# Supplementary material for: IrI(η4-diene) precatalyst activation by strong bases: formation of an anionic IrIII tetrahydride
Source: Royal Society of Chemistry journal article supplement (doi:10.1039/d2dt04036k), 2023-01-01
Supplement: d2dt04036k1.pdf [file d2dt04036k1.pdf]

## Ir( $\eta^4$ -diene) precatalyst activation by strong bases: formation of anionic Ir<sup>III</sup>H<sub>4</sub>

Paven Kisten,<sup>a,b</sup> Eric Manoury,<sup>b</sup> Agustí Lledós,<sup>c</sup> Adrian C. Whitwood,<sup>a</sup> Jason Lynam,<sup>a</sup> John Slattery,<sup>a</sup> Simon B. Duckett<sup>\*a</sup> and Rinaldo Poli<sup>\*b,d</sup>

<sup>a</sup> CNRS, LCC (Laboratoire de Chimie de Coordination), Université de Toulouse, UPS, INPT, 205 route de Narbonne, BP 44099, F-31077 Toulouse Cedex 4, France CNRS.

<sup>b</sup> Department of Chemistry, University of York, Heslington, York, YO10 5DD U.K..

<sup>c</sup> Departament de Química, Universitat Autònoma de Barcelona, 08193 Barcelona, Catalonia, Spain.

<sup>d</sup> Institut Universitaire de France, 1, rue Descartes, 75231 Paris Cedex 05, France

### SUPPORTING INFORMATION

#### INDEX

|                                                                                                                                                                                                                                                                                                                  |     |
|------------------------------------------------------------------------------------------------------------------------------------------------------------------------------------------------------------------------------------------------------------------------------------------------------------------|-----|
| <b>X-ray diffraction results</b>                                                                                                                                                                                                                                                                                 |     |
| Table S 1. Crystal data and structure refinement for compound <b>1</b> .                                                                                                                                                                                                                                         | S4  |
| Table S 2. Crystal data and structure refinement for compound [IrH(dppe) <sub>2</sub> ].                                                                                                                                                                                                                         | S5  |
| <b>NMR characterization of hydrides <b>2</b> and <b>3</b></b>                                                                                                                                                                                                                                                    |     |
| Figure S 1. ESI-HRMS (positive mode, in CH <sub>2</sub> Cl <sub>2</sub> solution) of the mixture of compounds <b>2</b> and <b>3</b> .                                                                                                                                                                            | S6  |
| Figure S 2. <sup>1</sup> H{ <sup>31</sup> P} (above) and <sup>1</sup> H (below) NMR spectra in the hydride region of the product obtained by addition of KO <sup>t</sup> Bu to [IrCl(COD)] <sub>2</sub> /dppe (with dppe/Ir slightly > 1) in <sup>i</sup> PrOH at 298 K. Solvent = C <sub>6</sub> D <sub>6</sub> | S7  |
| Figure S 3. <sup>31</sup> P{ <sup>1</sup> H} NMR spectrum of the product obtained by addition of KO <sup>t</sup> Bu to [IrCl(COD)] <sub>2</sub> /dppe in <sup>i</sup> PrOH at 298 K. Solvent = C <sub>6</sub> D <sub>6</sub> . The dppe/Ir ratio is 1:1 (above) and slightly > 1 (below).                        | S8  |
| Table S 3. NMR properties of isomeric [IrH(1,2,5,6- $\eta^2$ : $\eta^2$ -COD)(dppe)] ( <b>2</b> ) and [Ir(1- $\kappa$ -4,5,6- $\eta^3$ -C <sub>8</sub> H <sub>12</sub> )H(dppe)] ( <b>3</b> ) in C <sub>6</sub> D <sub>6</sub> .                                                                                 | S9  |
| Figure S 4. <sup>1</sup> H (below) and <sup>1</sup> H{ <sup>31</sup> P} (above) NMR spectra of the COD CH proton resonances for the mixture of <b>2</b> and <b>3</b> in C <sub>6</sub> D <sub>6</sub> at 298 K. The large starred resonance at 4.2 ppm presumably belongs to CH protons of residual isopropanol. | S12 |
| Figure S 5. <sup>1</sup> H (below) and <sup>1</sup> H{ <sup>31</sup> P} (above) NMR spectra of the phenyl proton resonance region for <b>2</b> and <b>3</b> in C <sub>6</sub> D <sub>6</sub> at 298 K.                                                                                                           | S12 |
| Figure S 6. Excerpt of the <sup>31</sup> P- <sup>1</sup> H HMQC spectrum of <b>2</b> and <b>3</b> in the aromatic CH resonance region, in C <sub>6</sub> D <sub>6</sub> at 298 K.                                                                                                                                | S13 |
| Figure S 7. <sup>1</sup> H{ <sup>31</sup> P} NMR spectrum of the sp <sup>3</sup> CH proton resonance region for <b>2</b> and <b>3</b> , in C <sub>6</sub> D <sub>6</sub> at 298 K.                                                                                                                               | S13 |
| Figure S 8. Excerpt of the <sup>1</sup> H- <sup>1</sup> H COSY spectrum of <b>2</b> and <b>3</b> in the COD and dppe sp <sup>3</sup> CH region, in C <sub>6</sub> D <sub>6</sub> at 298 K.                                                                                                                       | S14 |
| Figure S 9. Excerpt of the <sup>31</sup> P- <sup>1</sup> H HMQC spectrum of <b>2</b> and <b>3</b> in the COD and dppe sp <sup>3</sup> CH region, in C <sub>6</sub> D <sub>6</sub> at 298 K.                                                                                                                      | S14 |
| Figure S 10. Excerpt of the <sup>13</sup> C{ <sup>31</sup> P}- <sup>1</sup> H HMQC spectrum for <b>2</b> and <b>3</b> in C <sub>6</sub> D <sub>6</sub> in the COD sp <sup>2</sup> CH region.                                                                                                                     | S15 |
| <b>Kinetic analysis of the generation of <b>2</b> from <b>1</b> followed by its equilibrated transformation</b>                                                                                                                                                                                                  |     |

|                                                                                                                                                                                                                                                                                            |     |
|--------------------------------------------------------------------------------------------------------------------------------------------------------------------------------------------------------------------------------------------------------------------------------------------|-----|
| <b>to 3</b>                                                                                                                                                                                                                                                                                |     |
| Figure S 11. Plot of the first-order decay analysis for the conversion of <b>1</b> to <b>2</b> and <b>3</b> in Figure 3.                                                                                                                                                                   | S17 |
| <b>NMR characterization of hydrides 4 and 5</b>                                                                                                                                                                                                                                            |     |
| Figure S 12. <sup>1</sup> H NMR monitoring in the hydride resonance region of the solution obtained after addition of KO <sup>t</sup> Bu to <b>1</b> in C <sub>6</sub> D <sub>6</sub> at 298 K with generation of <b>4</b> and its isomerization to <b>5</b> .                             | S19 |
| Table S 4. NMR properties of isomeric [IrH(C <sub>8</sub> H <sub>10</sub> )(dppe)] complexes <b>4</b> and <b>5</b> in C <sub>6</sub> D <sub>6</sub>                                                                                                                                        | S20 |
| Figure S 13. <sup>1</sup> H{ <sup>31</sup> P} (above) and <sup>1</sup> H (below) spectra of the alkene region for the mixture of product <b>4</b> and <b>5</b> in C <sub>7</sub> D <sub>8</sub> .                                                                                          | S23 |
| Figure S 14. <sup>1</sup> H{ <sup>31</sup> P} (above) and <sup>1</sup> H (below) spectra of the phenyl region for the mixture of products <b>4</b> and <b>5</b> in C <sub>6</sub> D <sub>6</sub>                                                                                           | S23 |
| Figure S 15. Excerpt of the <sup>13</sup> C- <sup>1</sup> H HMQC NMR spectrum of the mixture of products <b>4</b> and <b>5</b> in C <sub>6</sub> D <sub>6</sub> in the sp <sup>2</sup> CH resonance region. The unbound alkene groups are highlighted in red.                              | S24 |
| Figure S 16. <sup>31</sup> P-decoupled H-H COSY spectrum of the mixture of products <b>4</b> and <b>5</b> in C <sub>6</sub> D <sub>6</sub> in the sp <sup>2</sup> -CH region.                                                                                                              | S24 |
| Figure S 17. <sup>31</sup> P- <sup>1</sup> H HMQC spectrum of <b>4</b> and <b>5</b> in C <sub>6</sub> D <sub>6</sub> at 298 K.                                                                                                                                                             | S25 |
| Figure S 18. NOE spectra highlighting the interaction between the alkene and allylic protons for <b>4</b> and <b>5</b>                                                                                                                                                                     | S26 |
| <b>Kinetic analysis of the equilibrated transformation of 4 to 5</b>                                                                                                                                                                                                                       |     |
| Figure S 19. First-order kinetic analysis of the <sup>1</sup> H data for the <b>4-5</b> isomerisation in toluene- <i>d</i> <sub>8</sub> at 298 K.                                                                                                                                          | S27 |
| <b>Energy profile for the isomerisation of II'</b>                                                                                                                                                                                                                                         |     |
| Figure S 20. Gibbs-energy profile (in kcal mol <sup>-1</sup> ) for the β-H elimination reactions from intermediate II'.                                                                                                                                                                    | S27 |
| <b>Analysis of the NMR spectra of the [IrH<sub>4</sub>(dppe)]<sup>-</sup> anion</b>                                                                                                                                                                                                        |     |
| Figure S 21. <sup>31</sup> P{ <sup>1</sup> H} NMR monitoring of the formation of <b>6</b> from a solution of <b>2/3</b> in C <sub>7</sub> D <sub>8</sub> at 353 K. The resonance of <b>2</b> is not visible because of the low concentration.                                              | S28 |
| Figure S 22. <sup>31</sup> P- <sup>1</sup> H HMQC spectrum of <b>6</b> in C <sub>7</sub> D <sub>8</sub> at 298 K, highlighting the proton phosphorus interactions.                                                                                                                         | S29 |
| Figure S 23. <sup>13</sup> C- <sup>1</sup> H HMQC spectrum of <b>6</b> in C <sub>7</sub> D <sub>8</sub> at 298 K.                                                                                                                                                                          | S30 |
| Figure S 24. <sup>1</sup> H (a) and <sup>31</sup> P{ <sup>1</sup> H} (b) NMR study of the interaction of <b>2/3</b> with H <sub>2</sub> in THF- <i>d</i> <sub>8</sub> at room temperature. Three bars of H <sub>2</sub> were first added, followed by 5 equivalents of KO <sup>t</sup> Bu. | S31 |
| Figure S 25. <sup>1</sup> H (a) and <sup>31</sup> P{ <sup>1</sup> H} (b) NMR study of the interaction of <b>4/5</b> with H <sub>2</sub> in THF- <i>d</i> <sub>8</sub> at room temperature. Three bars of H <sub>2</sub> were first added, followed by 5 equivalents of KO <sup>t</sup> Bu. | S32 |
| Figure S 26. <sup>1</sup> H (a) and <sup>31</sup> P{ <sup>1</sup> H} (b) NMR study of the interaction of <b>2/3</b> with H <sub>2</sub> in THF- <i>d</i> <sub>8</sub> at room temperature. Five equivalents of KO <sup>t</sup> Bu were first added, followed by 3 bars of H <sub>2</sub> . | S33 |
| Figure S 27. <sup>1</sup> H (a) and <sup>31</sup> P{ <sup>1</sup> H} (b) NMR study of the interaction of <b>4/5</b> with H <sub>2</sub> in THF- <i>d</i> <sub>8</sub> at room temperature. Five equivalents of KO <sup>t</sup> Bu were first added, followed by 3 bars of H <sub>2</sub> . | S34 |
|                                                                                                                                                                                                                                                                                            | S35 |
| Table S 5. NMR properties of K <sup>+</sup> [IrH <sub>4</sub> (dppe)] <sup>-</sup> ( <b>6</b> ) in C <sub>6</sub> D <sub>6</sub> .                                                                                                                                                         |     |
| <b>DFT-optimized geometries</b>                                                                                                                                                                                                                                                            |     |
| Table S 6. Energies (hartrees), views and Cartesian coordinates (Å) of all optimized geometries.                                                                                                                                                                                           | S36 |

## X-ray diffraction results

### Experimental details for the structural analysis of compounds **1** and [IrH(dppe)<sub>2</sub>]

Single crystals of compound **1** (C<sub>34</sub>H<sub>36</sub>P<sub>2</sub>ClIr) and [IrH(dppe)<sub>2</sub>] (C<sub>52</sub>H<sub>49</sub>IrP<sub>4</sub>) were obtained by crystallisation from dichloromethane/toluene. Diffraction data were collected at 110 K on an Oxford Diffraction SuperNova diffractometer with Cu-Kα radiation (λ = 1.54184 Å) using an EOS CCD camera. The crystal was cooled with an Oxford Instruments Cryojet. Diffractometer control, data collection, initial unit cell determination, frame integration and unit-cell refinement were carried out with CrysAlisPro (Oxford Diffraction Ltd.). Face-indexed absorption corrections were applied using spherical harmonics, implemented in SCALE3 ABSPACK scaling algorithm within CrysAlisPro. OLEX2<sup>1</sup> was used for overall structure solution, refinement and preparation of publication data. Within OLEX2, the algorithm used for structure solution was SHELXT<sup>2</sup> dual-spaced. Refinement by full-matrix least-squares used the SHELXL<sup>3</sup> algorithm within OLEX2. All non-hydrogen atoms were refined anisotropically. Hydrogen atoms were placed using a “riding model” and included in the refinement at calculated positions.

**sbd21004**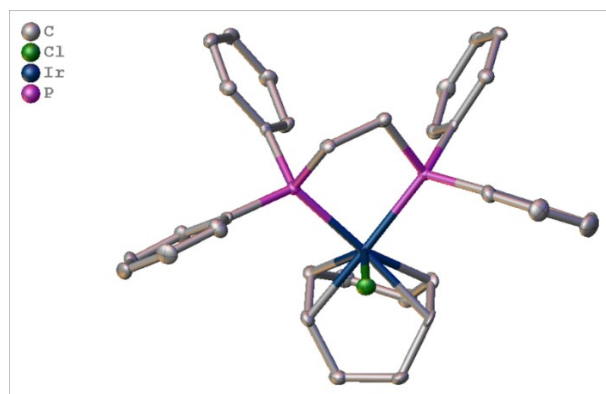Table S 1. Crystal data and structure refinement for compound **1**.

|                                             |                                                               |
|---------------------------------------------|---------------------------------------------------------------|
| Identification code                         | sbd21004                                                      |
| Empirical formula                           | C <sub>34</sub> H <sub>36</sub> P <sub>2</sub> ClIr           |
| Formula weight                              | 734.22                                                        |
| Temperature/K                               | 110.00(10)                                                    |
| Crystal system                              | monoclinic                                                    |
| Space group                                 | P2 <sub>1</sub> /c                                            |
| a/Å                                         | 14.0891(2)                                                    |
| b/Å                                         | 10.14941(14)                                                  |
| c/Å                                         | 20.5215(3)                                                    |
| α/°                                         | 90                                                            |
| β/°                                         | 90.8366(15)                                                   |
| γ/°                                         | 90                                                            |
| Volume/Å <sup>3</sup>                       | 2934.17(8)                                                    |
| Z                                           | 4                                                             |
| ρ <sub>calc</sub> /cm <sup>3</sup>          | 1.662                                                         |
| μ/mm <sup>-1</sup>                          | 4.773                                                         |
| F(000)                                      | 1456.0                                                        |
| Crystal size/mm <sup>3</sup>                | 0.263 × 0.196 × 0.05                                          |
| Radiation                                   | Mo Kα (λ = 0.71073)                                           |
| 2θ range for data collection/°              | 6.968 to 52.736                                               |
| Index ranges                                | -17 ≤ h ≤ 9, -12 ≤ k ≤ 12, -23 ≤ l ≤ 25                       |
| Reflections collected                       | 12585                                                         |
| Independent reflections                     | 5993 [R <sub>int</sub> = 0.0286, R <sub>sigma</sub> = 0.0456] |
| Data/restraints/parameters                  | 5993/0/343                                                    |
| Goodness-of-fit on F <sup>2</sup>           | 1.054                                                         |
| Final R indexes [I ≥ 2σ (I)]                | R <sub>1</sub> = 0.0271, wR <sub>2</sub> = 0.0518             |
| Final R indexes [all data]                  | R <sub>1</sub> = 0.0367, wR <sub>2</sub> = 0.0569             |
| Largest diff. peak/hole / e Å <sup>-3</sup> | 1.18/-0.77                                                    |

**sbd21001**

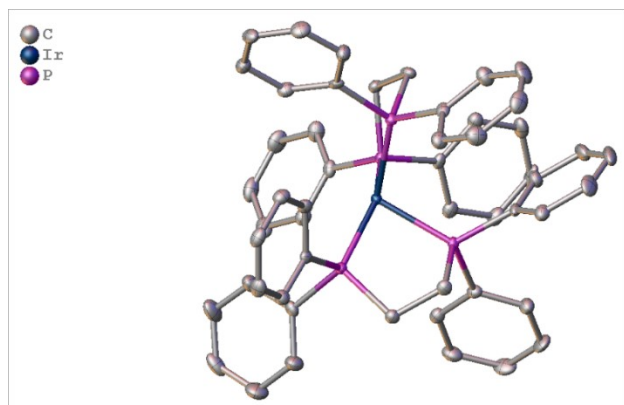

Table S 2. Crystal data and structure refinement for compound [IrH(dppe)<sub>2</sub>].

|                                             |                                                               |
|---------------------------------------------|---------------------------------------------------------------|
| Identification code                         | sbd21001                                                      |
| Empirical formula                           | C <sub>52</sub> H <sub>49</sub> IrP <sub>4</sub>              |
| Formula weight                              | 989.99                                                        |
| Temperature/K                               | 110.00(10)                                                    |
| Crystal system                              | monoclinic                                                    |
| Space group                                 | P2 <sub>1</sub> /n                                            |
| a/Å                                         | 10.09632(17)                                                  |
| b/Å                                         | 20.7085(4)                                                    |
| c/Å                                         | 20.9765(3)                                                    |
| α/°                                         | 90                                                            |
| β/°                                         | 90.7143(16)                                                   |
| γ/°                                         | 90                                                            |
| Volume/Å <sup>3</sup>                       | 4385.44(13)                                                   |
| Z                                           | 4                                                             |
| ρ <sub>calc</sub> /cm <sup>3</sup>          | 1.499                                                         |
| μ/mm <sup>-1</sup>                          | 7.536                                                         |
| F(000)                                      | 1992.0                                                        |
| Crystal size/mm <sup>3</sup>                | 0.155 × 0.119 × 0.045                                         |
| Radiation                                   | Cu Kα (λ = 1.54184)                                           |
| 2θ range for data collection/°              | 8.432 to 134.134                                              |
| Index ranges                                | -11 ≤ h ≤ 12, -24 ≤ k ≤ 19, -24 ≤ l ≤ 25                      |
| Reflections collected                       | 15880                                                         |
| Independent reflections                     | 7820 [R <sub>int</sub> = 0.0281, R <sub>sigma</sub> = 0.0397] |
| Data/restraints/parameters                  | 7820/0/518                                                    |
| Goodness-of-fit on F <sup>2</sup>           | 1.032                                                         |
| Final R indexes [I ≥ 2σ (I)]                | R <sub>1</sub> = 0.0238, wR <sub>2</sub> = 0.0499             |
| Final R indexes [all data]                  | R <sub>1</sub> = 0.0336, wR <sub>2</sub> = 0.0540             |
| Largest diff. peak/hole / e Å <sup>-3</sup> | 0.71/-0.45                                                    |

## Characterization of hydrides 2 and 3

### Analysis Information

Analysis Filename sbd91984pk\_P1-C-1\_01\_28621.d Acquisition Date 23/08/2021 15:25:04  
Method ESI\_low mass\_2c1s.m Instrument compact  
Submission Name sbd91984pk ESI Positive

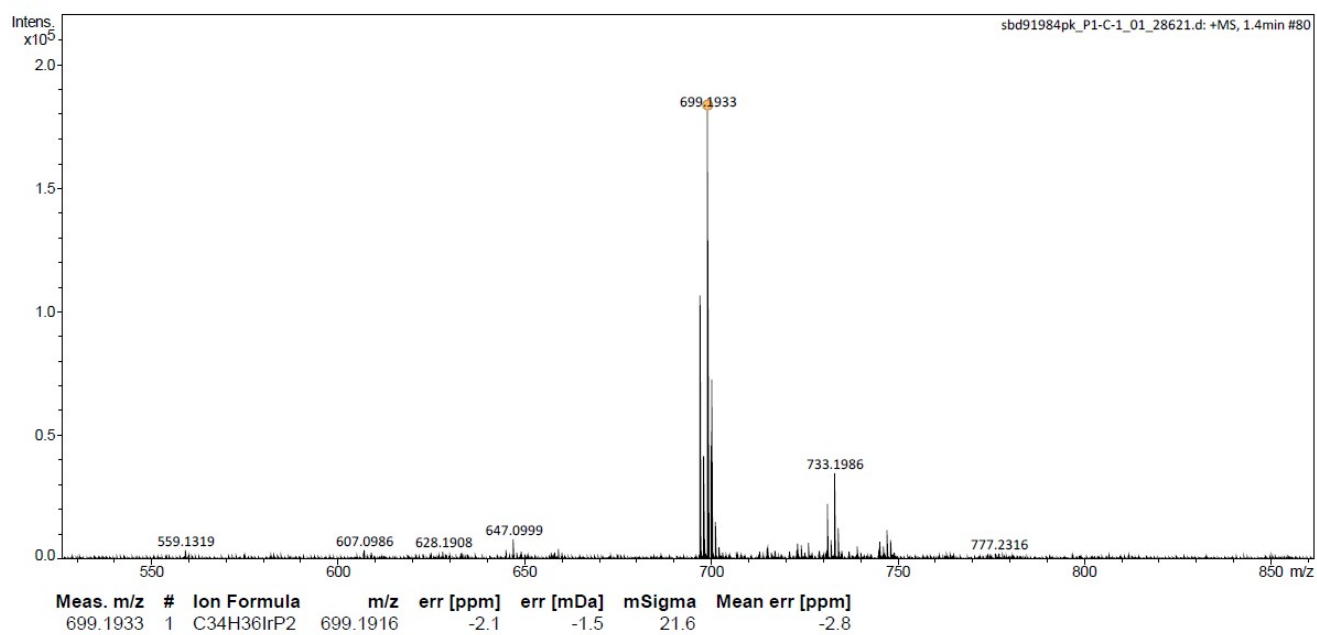

Figure S 1. ESI-HRMS (positive mode, in CH<sub>2</sub>Cl<sub>2</sub> solution) of the mixture of compounds 2 and 3.

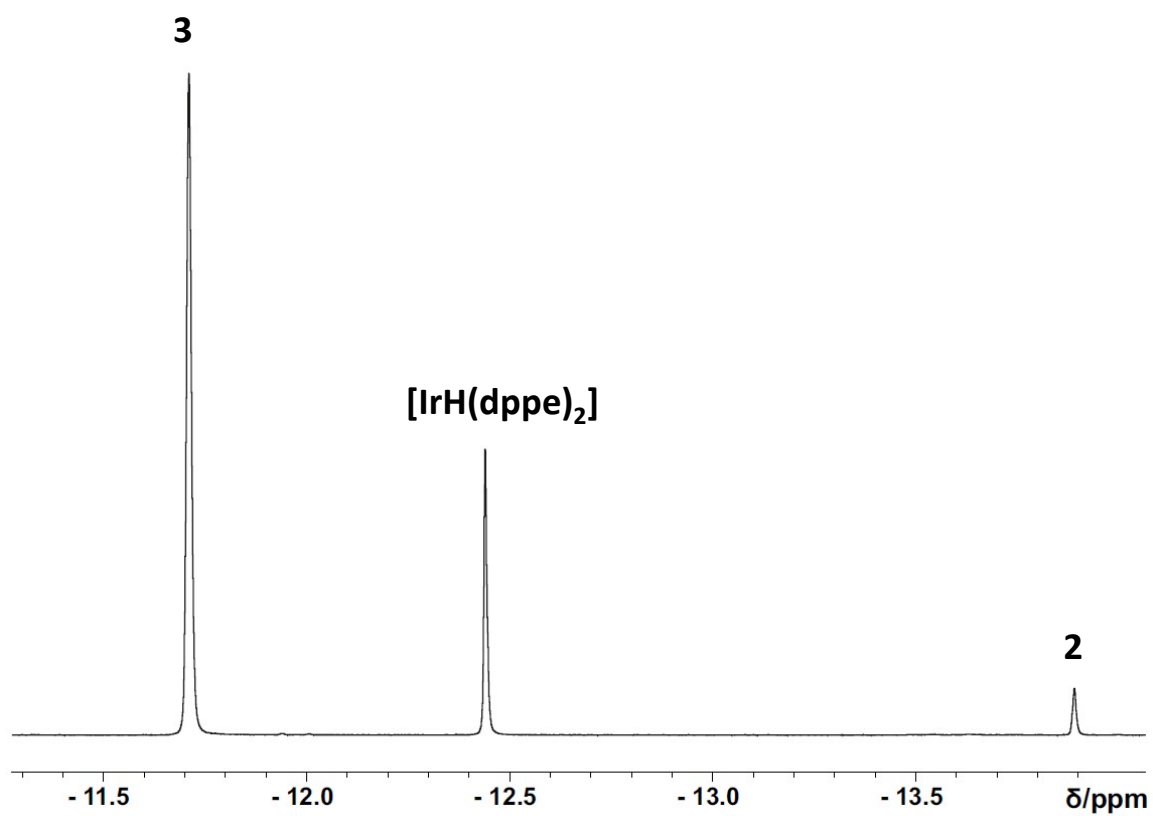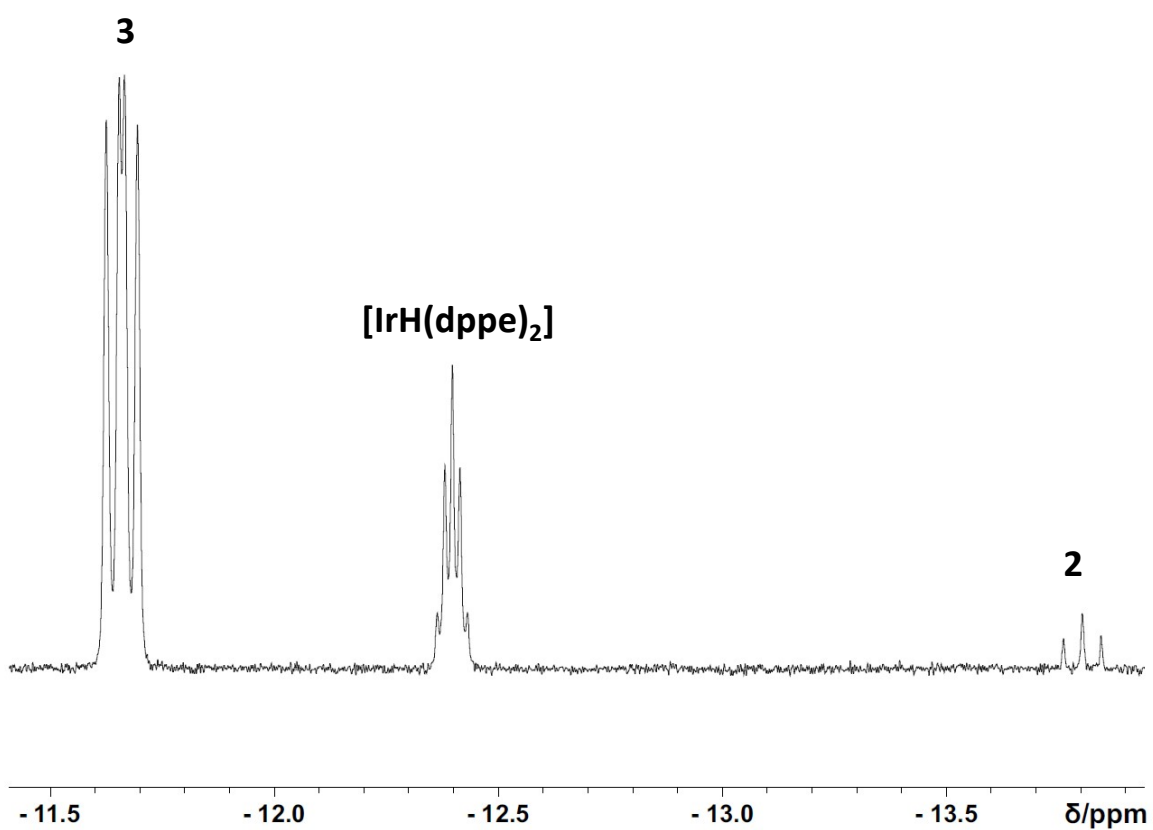

Figure S 2.  $^1\text{H}\{^{31}\text{P}\}$  (above) and  $^1\text{H}$  (below) NMR spectra in the hydride region of the product obtained by addition of  $\text{KO}^t\text{Bu}$  to  $[\text{IrCl}(\text{COD})]_2/\text{dppe}$  (with  $\text{dppe}/\text{Ir}$  slightly  $> 1$ ) in  $^i\text{PrOH}$  at 298 K. Solvent =  $\text{C}_6\text{D}_6$ .

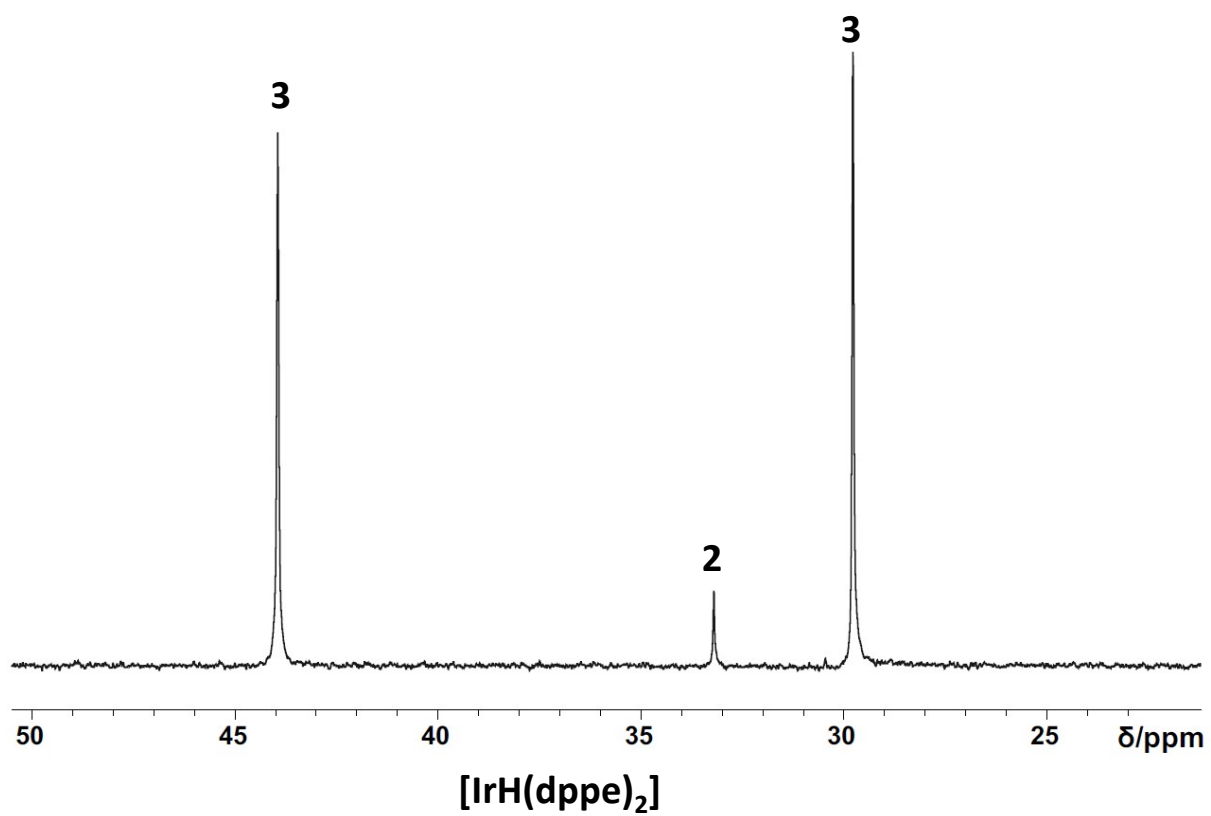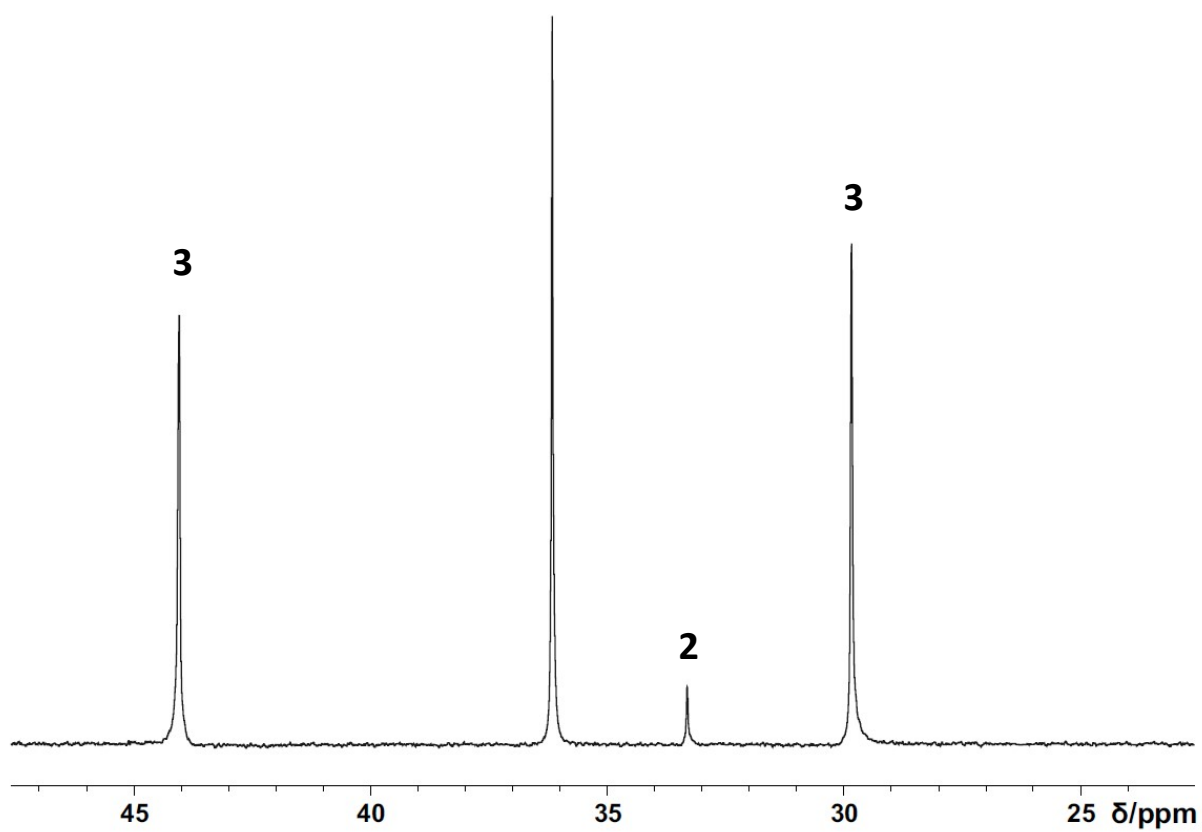

Figure S 3.  $^{31}\text{P}\{^1\text{H}\}$  NMR spectrum of the product obtained by addition of  $\text{KO}^t\text{Bu}$  to  $[\text{IrCl}(\text{COD})]_2/\text{dppe}$  in  $i\text{PrOH}$  at 298 K. Solvent =  $\text{C}_6\text{D}_6$ . The dppe/Ir ratio is 1:1 (above) and slightly  $> 1$  (below).



Table S 3. NMR properties of isomeric  $[\text{IrH}(1,2,5,6-\eta^2\text{-COD})(\text{dppe})]$  (**2**) and  $[\text{Ir}(1-\kappa\text{-}4,5,6-\eta^3\text{-C}_8\text{H}_{12})\text{H}(\text{dppe})]$  (**3**) in  $\text{C}_6\text{D}_6$ .

| Compound <b>2</b>                                                                 |                                       |                                      |                                                                                                                                                                      | Compound <b>3</b>                                                                   |                                                                                   |                                                                                                                                                                                                                                                                                                                                                            |                                                                                                    |
|-----------------------------------------------------------------------------------|---------------------------------------|--------------------------------------|----------------------------------------------------------------------------------------------------------------------------------------------------------------------|-------------------------------------------------------------------------------------|-----------------------------------------------------------------------------------|------------------------------------------------------------------------------------------------------------------------------------------------------------------------------------------------------------------------------------------------------------------------------------------------------------------------------------------------------------|----------------------------------------------------------------------------------------------------|
| 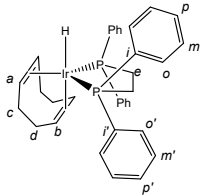 |                                       |                                      |                                                                                                                                                                      |  |                                                                                   |                                                                                                                                                                                                                                                                                                                                                            |                                                                                                    |
|                                                                                   | lit. <sup>4</sup> ( $\text{CDCl}_3$ ) | this work ( $\text{C}_6\text{D}_6$ ) | this work (DFT)                                                                                                                                                      |                                                                                     | lit. <sup>5</sup> ( $\text{C}_6\text{D}_6$ )                                      | this work ( $\text{C}_6\text{D}_6$ )                                                                                                                                                                                                                                                                                                                       | this work (DFT)                                                                                    |
| <b><sup>1</sup>H</b>                                                              |                                       |                                      |                                                                                                                                                                      |                                                                                     |                                                                                   |                                                                                                                                                                                                                                                                                                                                                            |                                                                                                    |
| Ph                                                                                | 7.3 (m)                               | 8.01 – 7.0                           |                                                                                                                                                                      | Ph                                                                                  | 8.2-7.0 (m)                                                                       | 8.05 ( $o_{B,\text{down}}$ ), 8.00 ( $o_{A,\text{up}}$ ), 7.60 ( $o_{B,\text{up}}$ ), 7.23 ( $m_{B,\text{down}}$ ), 7.18 ( $p_{B,\text{down}}$ ), 7.15 ( $m_{A,\text{up}}$ ), 7.10 ( $p_{A,\text{up}}$ ), 7.05 ( $m_{B,\text{up}}$ ), 6.99 ( $p_{B,\text{up}}$ ), 6.92 ( $m_{A,\text{down}}$ ), 6.85 ( $p_{A,\text{down}}$ ), 6.83 ( $o_{A,\text{down}}$ ) |                                                                                                    |
| COD CH                                                                            | <sup>a</sup>                          | 3.81 (bs)                            | 3.6 ( <i>a</i> )<br>2.7 ( <i>b</i> )                                                                                                                                 | C <sub>8</sub> H <sub>12</sub> allyl                                                | 5.15 (bm) ( <i>b, b'</i> )<br>5.07 (bm) ( <i>b, b'</i> )<br>4.01 (m) ( <i>a</i> ) | 5.06 (bm) ( <i>b</i> )<br>4.97 (bm) ( <i>b'</i> )<br>3.91 (dt, $J_{\text{HH}} = 7.5$ ; $J_{\text{PH}} = 14.3$ ) ( <i>a</i> )                                                                                                                                                                                                                               | 4.5 ( <i>b</i> )<br>4.7 ( <i>b'</i> )<br>3.2 ( <i>a</i> )                                          |
| COD CH <sub>2</sub>                                                               | <sup>a</sup>                          | 2.45, 2.36                           | 2.52 ( $c_{\text{exo}}$ ) <sup>b</sup> , 2.50 ( $c_{\text{endo}}$ ) <sup>b</sup><br>1.78 ( $d_{\text{exo}}$ ) <sup>b</sup> , 1.91 ( $d_{\text{endo}}$ ) <sup>b</sup> |                                                                                     | C <sub>8</sub> H <sub>12</sub> Ir-CH                                              | 2.34 (bm) ( <i>c</i> )                                                                                                                                                                                                                                                                                                                                     | 0.9                                                                                                |
| dppe CH <sub>2</sub>                                                              | 2.05                                  | 2.21, 1.81                           | 2.2, 2.7                                                                                                                                                             | C <sub>8</sub> H <sub>12</sub> CH <sub>2</sub>                                      | 2.2-1.8 (multiplets)                                                              | 2.47, 2.17 ( <i>d'</i> )<br>2.50, 2.26 ( <i>d</i> )<br>2.23, 1.88 ( <i>e'</i> )<br>2.10, 1.78 ( <i>e</i> )                                                                                                                                                                                                                                                 | 1.3, 2.1 ( <i>d</i> )<br>1.4, 1.8 ( <i>d'</i> )<br>1.9, 2.0 ( <i>e</i> )<br>1.8, 1.9 ( <i>e'</i> ) |
|                                                                                   |                                       |                                      |                                                                                                                                                                      | dppe CH <sub>2</sub>                                                                | 2.5 (bm), 2.0 (bm)                                                                | 2.07 <sub>(up)</sub> , 1.47 <sub>(down)</sub> ( <i>f</i> )<br>2.46 <sub>(down)</sub> , 1.94 <sub>(up)</sub> ( <i>g</i> )                                                                                                                                                                                                                                   |                                                                                                    |
| Ir-H                                                                              | -14 (t, $J_{\text{PH}} = 21.5$ Hz)    | -14.0 (t, $J_{\text{PH}} = 21.6$ )   | -7.66                                                                                                                                                                | Ir-H                                                                                | -11.55 (dd, $J_{\text{HP}} = 14.7$ , $J_{\text{HP}} = 20.6$ Hz)                   | -11.66 (dd, $J_{\text{PH}} = 14.9$ (P <sub>A</sub> ), 22.2 (P <sub>B</sub> ))                                                                                                                                                                                                                                                                              | -4.0                                                                                               |

Table S 3(contd).

| Compound <b>2</b> | Compound <b>3</b> |
|-------------------|-------------------|
|-------------------|-------------------|

|                       |              | lit., <sup>6</sup> (CDCl <sub>3</sub> )                                        |                                      | this work (C <sub>6</sub> D <sub>6</sub> )     |                                                                                                                                                                                                                                                                                                                                                                                                                                                                              | lit., <sup>5</sup> (C <sub>6</sub> D <sub>6</sub> )                                    |  | this work (C <sub>6</sub> D <sub>6</sub> ) |  |
|-----------------------|--------------|--------------------------------------------------------------------------------|--------------------------------------|------------------------------------------------|------------------------------------------------------------------------------------------------------------------------------------------------------------------------------------------------------------------------------------------------------------------------------------------------------------------------------------------------------------------------------------------------------------------------------------------------------------------------------|----------------------------------------------------------------------------------------|--|--------------------------------------------|--|
|                       |              |                                                                                |                                      |                                                |                                                                                                                                                                                                                                                                                                                                                                                                                                                                              |                                                                                        |  |                                            |  |
| <b><sup>13</sup>C</b> |              |                                                                                |                                      |                                                |                                                                                                                                                                                                                                                                                                                                                                                                                                                                              |                                                                                        |  |                                            |  |
| Ph                    | Not reported | <sup>c</sup><br>134.5 ( <i>o</i> )<br>127.9 ( <i>m</i> )<br>128.9 ( <i>p</i> ) | Ph                                   | 138-128                                        | 137.07 (d, $J_{PC} = 30$ Hz, $i_{A,down}$ ), 136.97 (d, $J_{PC} = 53$ Hz, $i_{B,up}$ ), 135.46 ( $o_{A,up}$ ), 135.36 (d, $J_{PC} = 38$ Hz, $i_{A,up}$ ), 134.77 ( $o_{B,down}$ ), 134.32 (d, $J_{PC} = 34$ Hz, $i_{A,up}$ ), 130.82 ( $o_{A,down}$ ), 132.00 ( $o_{B,up}$ ), 128.92 ( $p_{B,up}$ ), 129.94 ( $p_{B,down}$ ), 129.82 ( $p_{A,up}$ ), 128.23 ( $p_{A,down}$ ), 127.91 ( $m_{A,up}$ ), 127.71 ( $m_{A,down}$ ), 127.62 ( $m_{B,up}$ ), 127.94 ( $m_{B,down}$ ) |                                                                                        |  |                                            |  |
| COD CH                |              | 63.2 ( <i>a, b</i> )                                                           | C <sub>8</sub> H <sub>12</sub> allyl | 91.3 (s), 63.2 (d, $J_{CP} = 37.2$ Hz)         | 91.00 (s) ( <i>a</i> )                                                                                                                                                                                                                                                                                                                                                                                                                                                       |                                                                                        |  |                                            |  |
| COD CH <sub>2</sub>   |              | 35.5 ( <i>c, d</i> )                                                           |                                      |                                                | 62.80 (s) ( <i>b'</i> )<br>72.00 (s) ( <i>b</i> )                                                                                                                                                                                                                                                                                                                                                                                                                            |                                                                                        |  |                                            |  |
| dppe CH <sub>2</sub>  |              |                                                                                | 29.3 ( <i>e</i> )                    | C <sub>8</sub> H <sub>12</sub> CH <sub>2</sub> | 56.5 (s), 55.3 (d, $J_{CP} = 13.9$ Hz),<br>29.4 (s), 27.0 (d, $J_{PC} = 29.3, 13.9$ Hz)                                                                                                                                                                                                                                                                                                                                                                                      | 29.13 ( <i>e'</i> )<br>56.22 ( <i>d'</i> )<br>26.72 ( <i>e</i> )<br>54.95 ( <i>d</i> ) |  |                                            |  |
|                       |              |                                                                                | C <sub>8</sub> H <sub>12</sub> Ir-CH | 33.0 (dd, $J_{PC} = 72.6, 4.6$ Hz)             | 32.72 (d, $J_{PC} = 30$ Hz)                                                                                                                                                                                                                                                                                                                                                                                                                                                  |                                                                                        |  |                                            |  |
|                       |              |                                                                                | dppe CH <sub>2</sub>                 | 35.7 (m), 29.6 (m)                             | 29.42 ( <i>f</i> )<br>35.09 ( <i>g</i> )                                                                                                                                                                                                                                                                                                                                                                                                                                     |                                                                                        |  |                                            |  |
| <b><sup>31</sup>P</b> |              |                                                                                |                                      |                                                |                                                                                                                                                                                                                                                                                                                                                                                                                                                                              |                                                                                        |  |                                            |  |
|                       | Not reported | 33.2 (s)                                                                       |                                      | 43.8 (d), 29.7 (d), $J_{PP} = 2.0$ Hz          | 43.9 (d, P <sub>B</sub> ), 29.1 (d, P <sub>A</sub> ) $J_{PP} = 2.8$                                                                                                                                                                                                                                                                                                                                                                                                          |                                                                                        |  |                                            |  |

<sup>a</sup> Assignment prevented by decomposition in CDCl<sub>3</sub>. <sup>b</sup> The static optimized structure (C<sub>1</sub> symmetry) gave two different values for two pseudo-symmetric CH<sub>exo</sub> and for the two pseudo-symmetric CH<sub>endo</sub> on each C atom (*c* and *d*); the reported numbers are the averages of each pair. <sup>c</sup> The assignment of the Ph *ipso* <sup>13</sup>C resonances of compound **2** was prevented by large overlap with other major resonances.

### Comments on the NMR characterisation of **2** and **3**.

The COD allyl region shown in Figure S 4, establishes the peak positions for each of the  $\kappa^3$  CH resonances seen in product **3**, and a minor COD-CH peak at 3.8 ppm for **2**. The previous work by Oro *et al.*<sup>6</sup> did not mention the observation of an allylic peak due to the decomposition in solvent, however, in  $C_6D_6$  this compound appeared to be perfectly stable. A signal is seen for the  $\eta^2:\eta^2$  CH groups. A single broad peak is observed for the allylic CH of **2** (*a* and *b*) rather than two. The DFT calculated NMR resonances give two separate resonance values, as one of the alkene groups is *trans* to the hydride whereas the other is *syn*. Two  $^1H$  signals are observed for the ethylene backbone of the dppe, in both the experimental and calculated chemical shifts, this can easily be assigned due to the stability of **2**. The major difference between the experimental and calculated chemical shifts arise from the COD  $CH_2$ . Two signals are observed experimentally, whereas, there are four calculated chemical shifts for both the *exo* and *endo* hydrogens on each carbon *2c*, and *2d*. The large overlap of the signals makes it difficult to extract each resonance for *2c*, and *2d*

The two closely placed multiplets observed for **3** around 5 ppm do not change in shape upon  $^{31}P$  decoupling, whereas the doublet of triplet signals at 3.91 ppm collapses to a triplet (Figure S 4). This difference in shape upon decoupling aids the distinction of the positions for the  $\eta$ -bound portion of the ligand, specifically  $3H_a$ . The chemical shifts for each of the  $sp^2$ -hybridised protons are not significantly different from those previously reported. In this case the calculated DFT results show a similar trend to the experimentally determined chemical shifts.

The phenyl region of the  $^1H$  (and  $^1H\{^{31}P\}$ ) spectra shows several multiplets arising from HP and HH coupling of the protons on the phenyl rings (Figure S 5). When the HP coupling is removed, the region is easier to interpret and allows assignment of each resonance to the proton at the corresponding position on the phenyl ring. Given the minor amount of **2** (~5%),  $^{31}P$ - $^1H$  HMQC methods were deployed to resolve minor peak positions (Figure S 6). More importantly through the HMQC experiments the specific phenyl and  $CH_2$  groups both on the COD ligand and ethylene bridge of the dppe (Figure S 9) could be assigned. Through this process of elimination, we could easily assign the rest of the peaks based on what would not couple to the P atoms from long range. The  $sp^3$  CH region of the  $^1H$  spectrum shows a complex region of multiplets, even when decoupled from  $^{31}P$ , as protons for both COD  $CH_2$  (8H) groups on **2** and **3** are observed. This is further complicated by the  $CH_2$  resonances on the  $C_2H_4$  fragment on the dppe ligand. Notably, no H-P couplings could be clearly discerned. The spectrum can be resolved by using 2D NMR methods (Figure S 8). These experiments allow the  $CH_2$  peaks to be easily assigned based on their coupling to the known resonances of protons in the other regions of the spectrum.

The excerpt of the HMQC spectrum in Figure S 10 highlights the correlation between the proton and carbon resonances of the allyl protons. The relative peak position of the  $^{13}C$  resonance correspond to those seen for allyl-type bonding (for **3**).

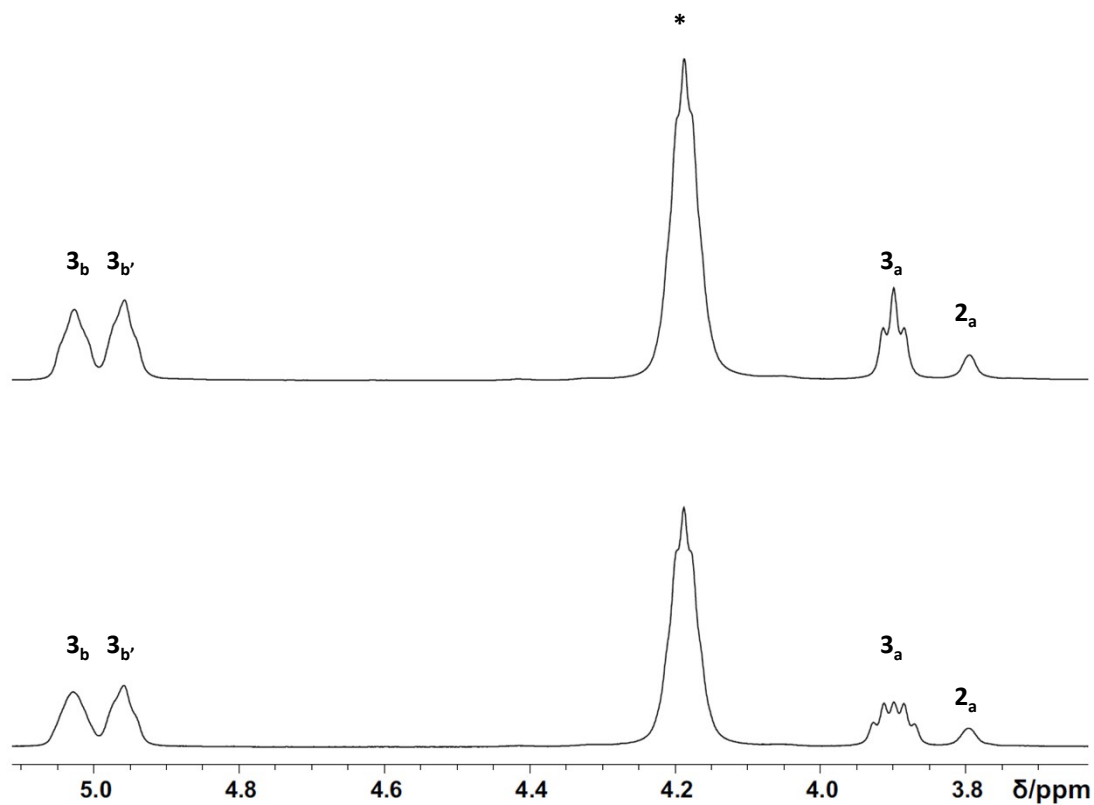

Figure S 4.  $^1\text{H}$  (below) and  $^1\text{H}\{^{31}\text{P}\}$  (above) NMR spectra of the COD CH proton resonances for the mixture of **2** and **3** in  $\text{C}_6\text{D}_6$  at 298 K. The large starred resonance at 4.2 ppm presumably belongs to CH protons of residual isopropanol.

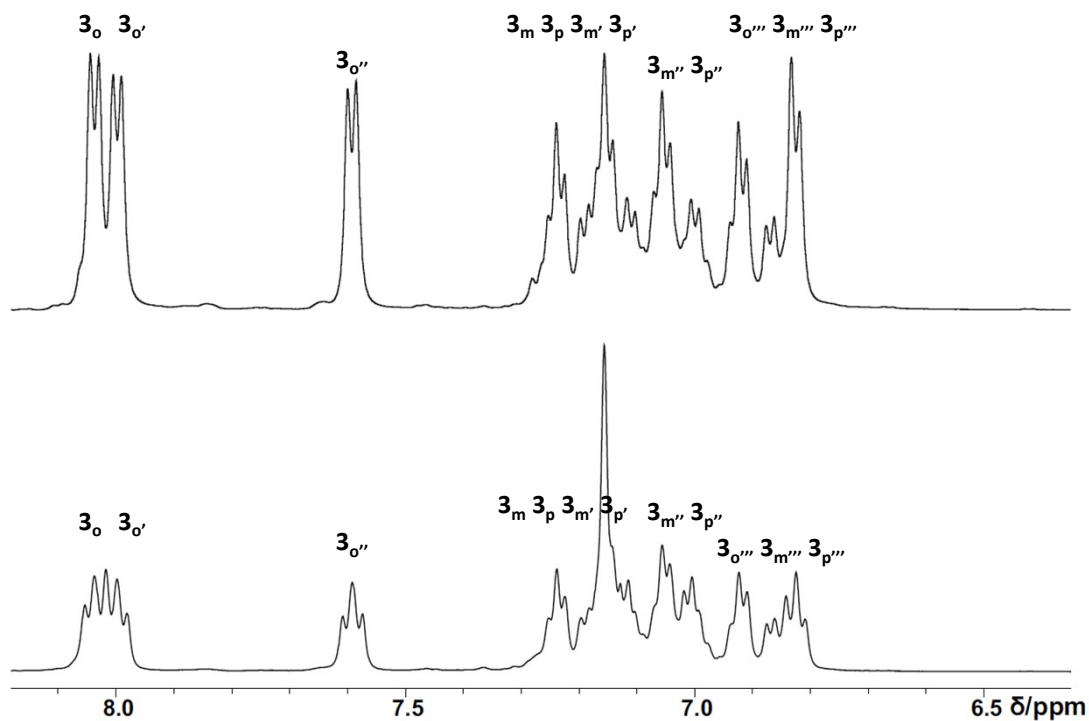

Figure S 5.  $^1\text{H}$  (below) and  $^1\text{H}\{^{31}\text{P}\}$  (above) NMR spectra of the phenyl proton resonance region for **2** and **3** in  $\text{C}_6\text{D}_6$  at 298 K.

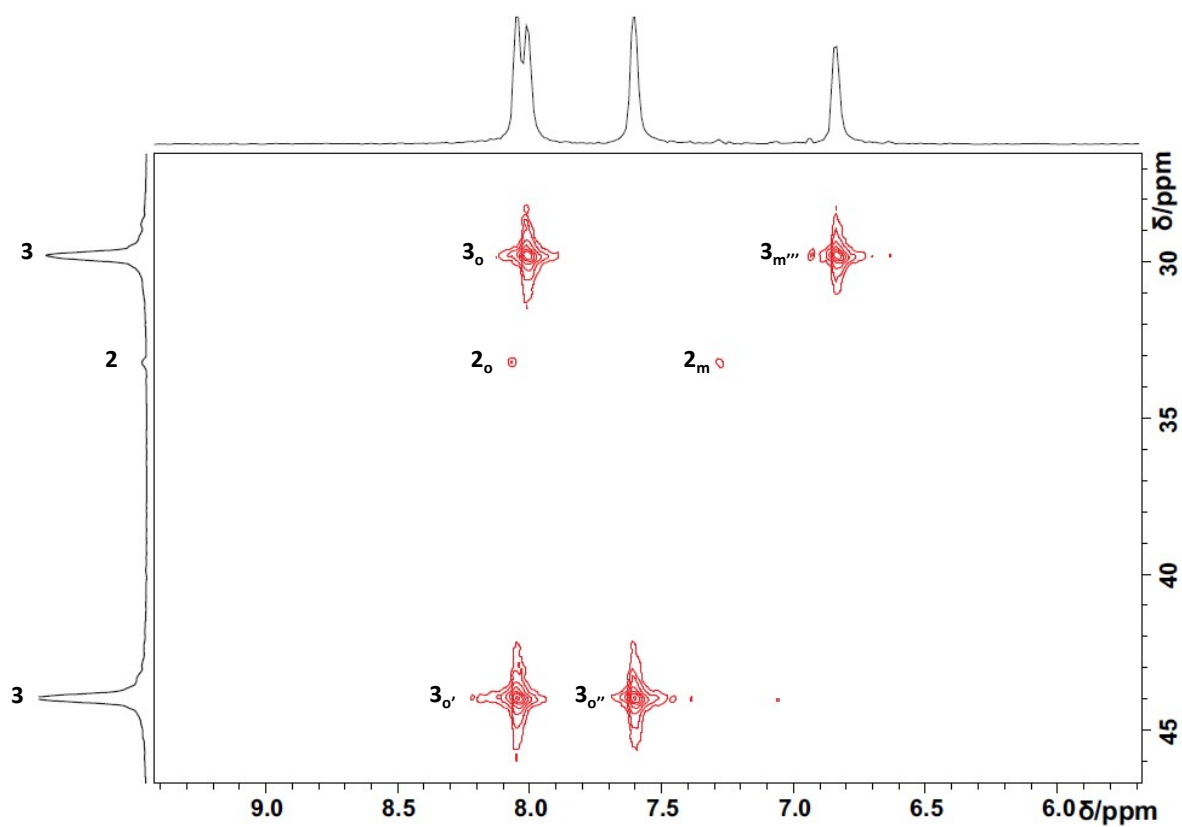

Figure S 6. Excerpt of the  $^{31}\text{P}$ - $^1\text{H}$  HMQC spectrum of **2** and **3** in the aromatic CH resonance region, in  $\text{C}_6\text{D}_6$  at 298 K.

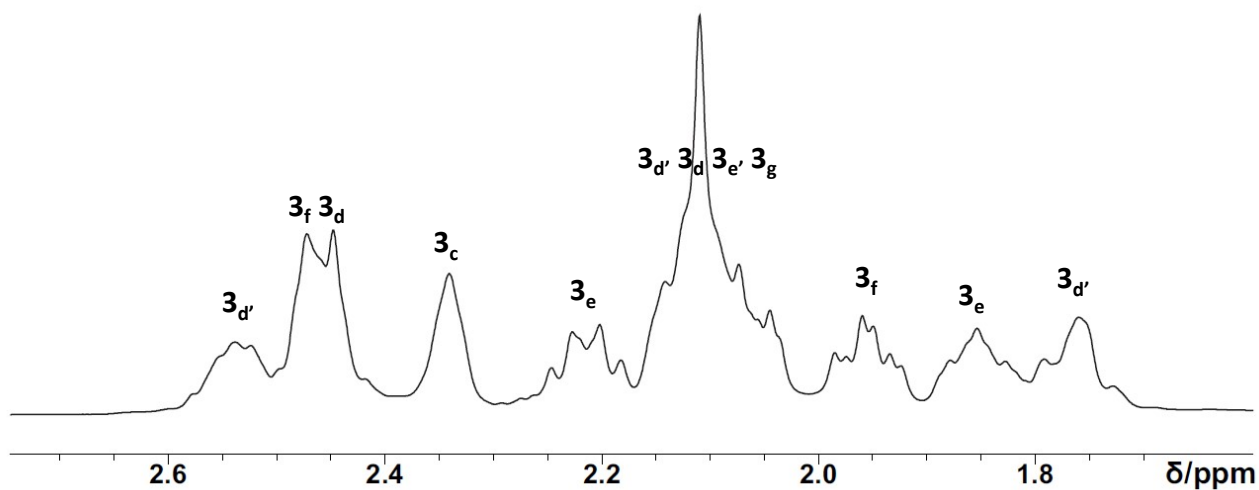

Figure S 7.  $^1\text{H}\{^{31}\text{P}\}$  NMR spectrum of the  $\text{sp}^3$  CH proton resonance region for **2** and **3**, in  $\text{C}_6\text{D}_6$  at 298 K.

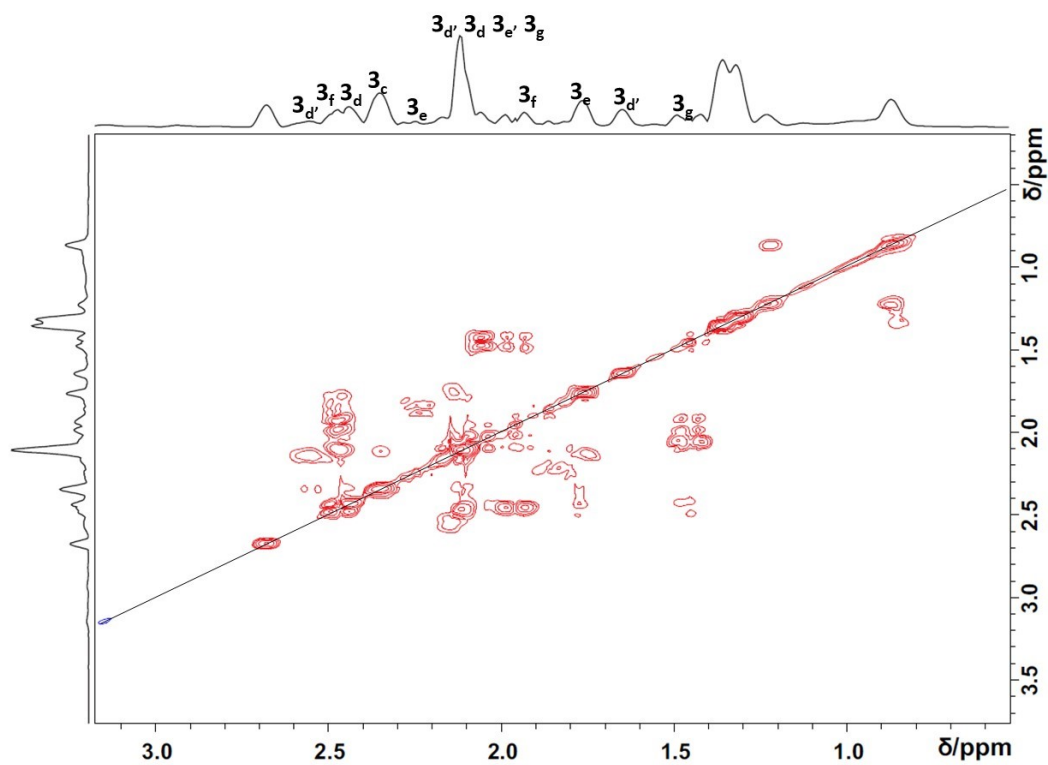

Figure S 8. Excerpt of the  $^1\text{H}$ - $^1\text{H}$  COSY spectrum of **2** and **3** in the COD and dppe  $\text{sp}^3$  CH region, in  $\text{C}_6\text{D}_6$  at 298 K.

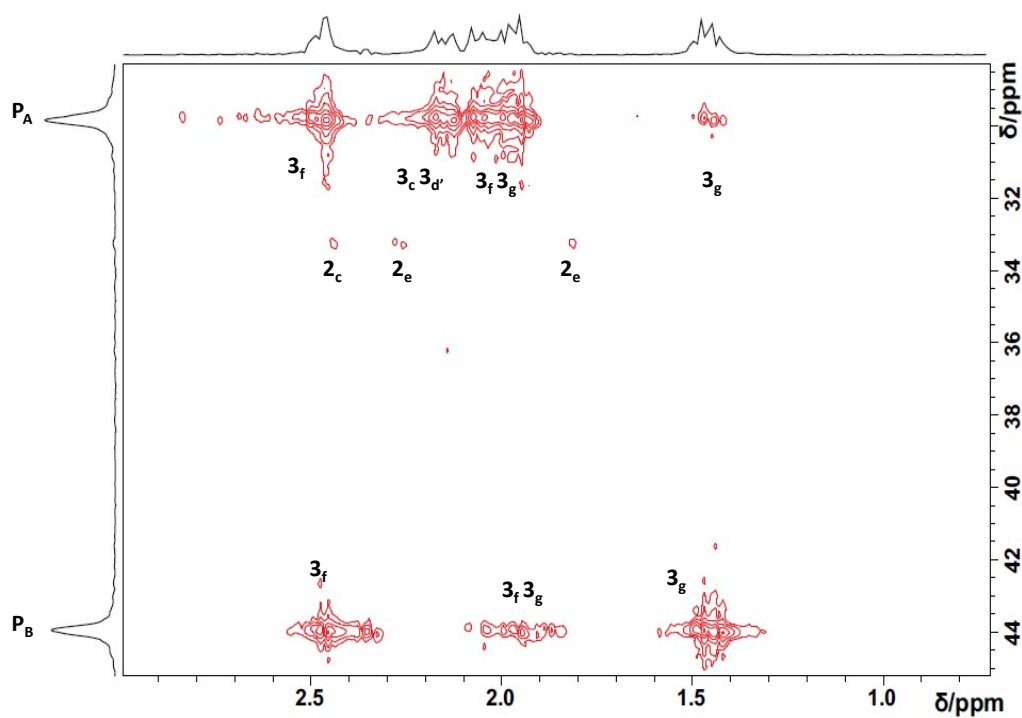

Figure S 9. Excerpt of the  $^{31}\text{P}$ - $^1\text{H}$  HMQC spectrum of **2** and **3** in the COD and dppe  $\text{sp}^3$  CH region, in  $\text{C}_6\text{D}_6$  at 298 K.

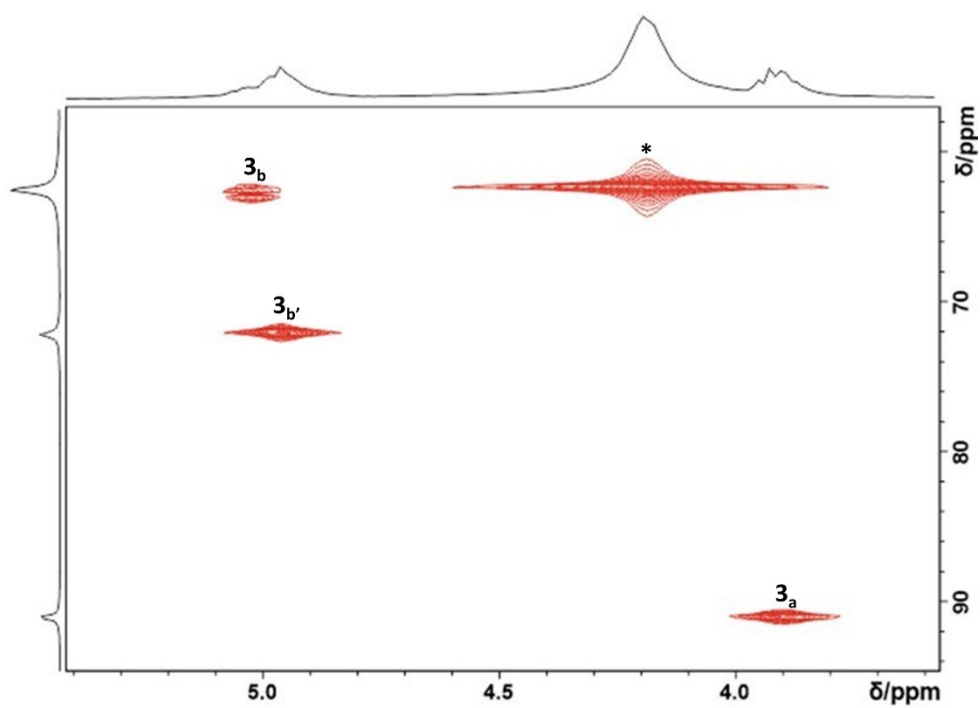

Figure S 10. Excerpt of the  $^{13}\text{C}\{^{31}\text{P}\}\text{-}^1\text{H}$  HMQC spectrum for **2** and **3** in  $\text{C}_6\text{D}_6$  in the COD  $\text{sp}^2$  CH region. The starred resonance belongs to isopropanol, in  $\text{C}_6\text{D}_6$  at 298 K.

## Kinetic analysis of the generation of 2 from 1 followed by its equilibrated transformation to 3

The transformation follows the general kinetic scheme

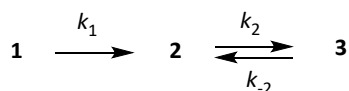

With the boundary conditions

Time zero:  $[1] = [1]_0$ ;  $[2]_0 = [3]_0 = 0$

Time infinity (equilibrium):  $[1] = 0$ ;  $[2] = [2]_{\text{eq}}$ ;  $[3] = [3]_{\text{eq}}$ ;  $[3]_{\text{eq}}/[2]_{\text{eq}} = k_2/k_{-2}$

Mass conservation:  $[1] + [2] + [3] = [1]_0$

### 1. Data:

| Time/s | x(1)   | x(2)   | x(3)   |
|--------|--------|--------|--------|
| 30     | 0.9124 | 0.0584 | 0.0292 |
| 2280   | 0.7752 | 0.1256 | 0.0992 |
| 4500   | 0.6207 | 0.1769 | 0.2024 |
| 6780   | 0.4919 | 0.1736 | 0.3345 |
| 9060   | 0.3648 | 0.1755 | 0.4597 |
| 11340  | 0.2814 | 0.1559 | 0.5627 |
| 13560  | 0.2147 | 0.1239 | 0.6614 |
| 15780  | 0.1586 | 0.1026 | 0.7389 |
| 18120  | 0.1186 | 0.0842 | 0.7972 |
| 20400  | 0.1045 | 0.0711 | 0.8245 |
| 26520  | 0.0701 | 0.0561 | 0.8738 |
| 29100  | 0.0313 | 0.0466 | 0.9221 |
| 32340  | 0.0168 | 0.0476 | 0.9356 |
| 35040  | 0.0036 | 0.0402 | 0.9562 |

### 2. Decay of 1

This is a first-order decay ( $-\frac{d[1]}{dt} = k_1[1]$ ), easily integrated to yield the well-known solution

$$[1] = [1]_0 e^{-k_1 t} \quad \text{or} \quad \ln \frac{[1]_0}{[1]} = k_1 t$$

Analysis of the first-order decay of 1 yields  $k_1 = (6.09 \pm 0.16) \cdot 10^{-3} \text{ min}^{-1} = (1.13 \pm 0.03) \cdot 10^{-4} \text{ s}^{-1}$ .



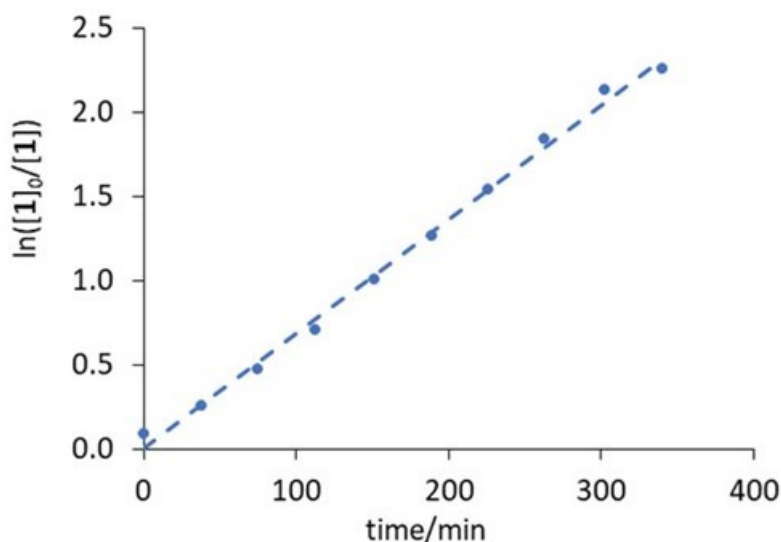

Figure S 11. Plot of the first-order decay analysis for the conversion of **1** to **2** and **3** in Figure 3.

### 3. Global fit

The three rate constants  $k_1$ ,  $k_2$  and  $k_{-2}$  were obtained by numerical integration of the differential equations

$$-\frac{d[1]}{dt} = k_1[1]; \quad -d[1] = k_1[1]dt$$

$$\frac{d[2]}{dt} = k_1[1] - k_2[2] + k_{-2}[3]; \quad d[2] = (k_1[1] - k_2[2] + k_{-2}[3])dt$$

$$\frac{d[3]}{dt} = k_2[2] - k_{-2}[3]; \quad d[3] = (k_2[2] - k_{-2}[3])dt$$

to yield the concentration variations during each short time interval  $\Delta t$ , which was set to 1 s for the analysis, as follows:

$$[1]_{t+\Delta t} = [1]_t - k_1[1]_t\Delta t$$

$$[2]_{t+\Delta t} = [2]_t + (k_1[1]_t - k_2[2]_t + k_{-2}[3]_t)\Delta t$$

$$[3]_{t+\Delta t} = [3]_t + (k_2[2]_t - k_{-2}[3]_t)\Delta t$$

Since all elementary steps are first order processes, the analysis was more conveniently carried out on

the molar fractions ( $x_1 = \frac{[1]}{([1] + [2] + [3])}$ ;  $x_2 = \frac{[2]}{([1] + [2] + [3])}$ ;  $x_3 = \frac{[3]}{([1] + [2] + [3])}$ ):

$$x_{1,t+\Delta t} = x_{1,t} - k_1x_{1,t}\Delta t$$

$$x_{2,t+\Delta t} = x_{2,t} + (k_1x_{1,t} - k_2x_{2,t} + k_{-2}x_{3,t})\Delta t$$

$$x_{3,t+\Delta t} = x_{3,t} + (k_2x_{2,t} - k_{-2}x_{3,t})\Delta t$$

By imposing the initial condition at time zero ( $x_{1,0} = 1; x_{2,0} = x_{3,0} = 0$ ), the calculated **1**, **2** and **3** fractions at the times  $t_i$  of the experimental observations ( $x_{1,i,calc}, x_{2,i,calc}, x_{3,i,calc}$ ) were derived by numerical integration on the basis of initial guess values of the rate constants  $k_1, k_2$  and  $k_{-2}$ , which were treated as adjustable parameters during the fit. A non-linear least-squares fit was then performed to minimize the function

$$SUM = \sum_i [(x_{1,i} - x_{1,i})^2 + (x_{2,i} - x_{2,i})^2 + (x_{3,i} - x_{3,i})^2]$$

By using the Solver tool of Excel. The resulting fits of the time evolutions of **1**, **2** and **3** are shown in Figure 3. The standard deviations on the optimized parameters were obtained with the Excel Macro Solver Aid.

## NMR characterization of hydrides **4** and **5**

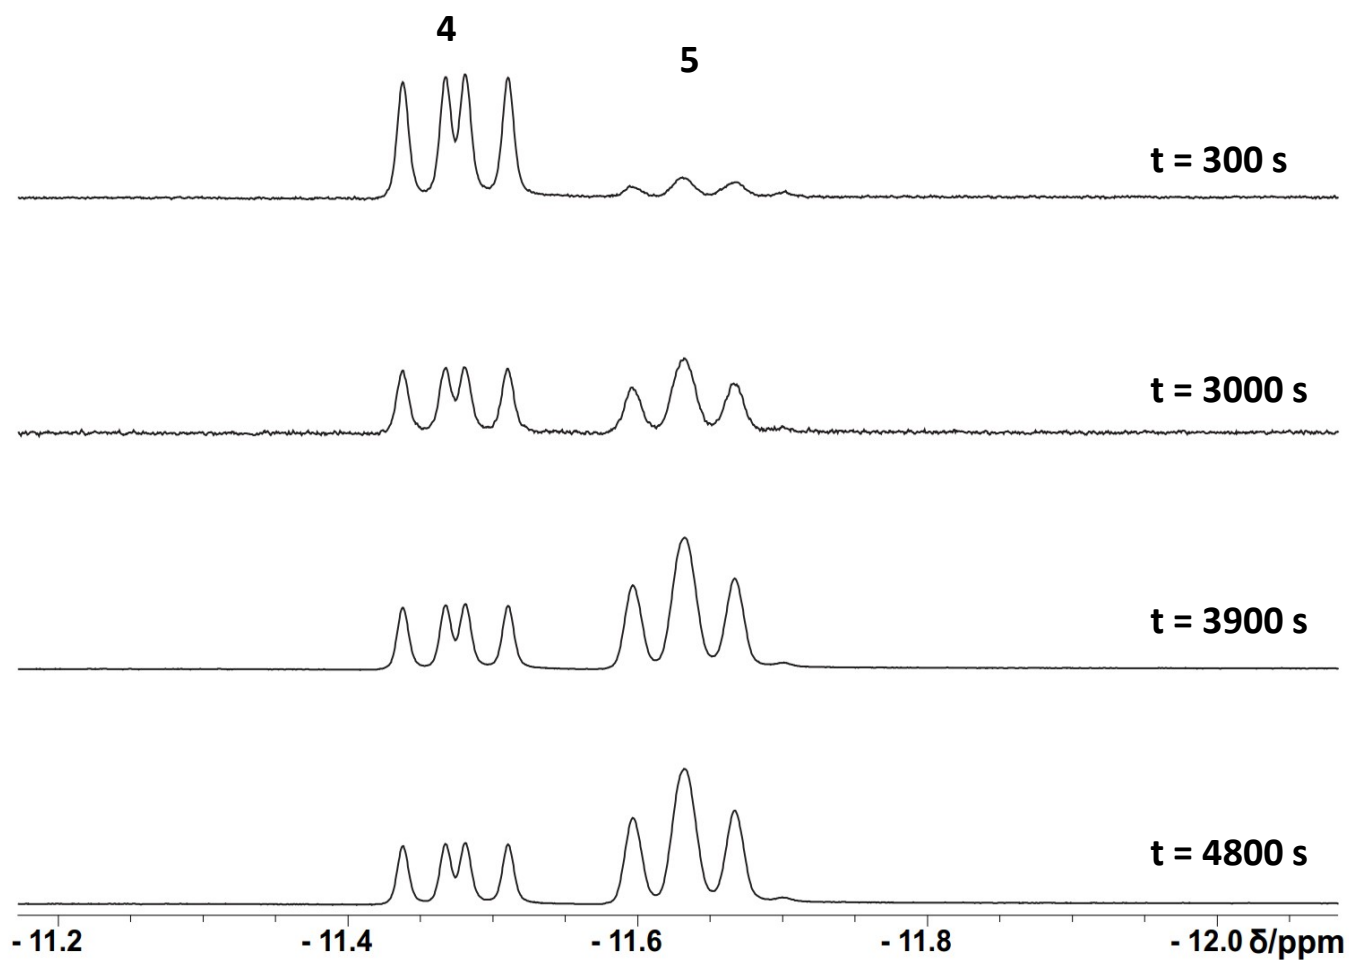

Figure S 12.  $^1\text{H}$  NMR monitoring in the hydride resonance region of the solution obtained after addition of  $\text{KO}^t\text{Bu}$  to **1** in  $\text{C}_6\text{D}_6$  at 298 K with generation of **4** and its isomerization to **5**.

Table S 4. NMR properties of isomeric  $[\text{IrH}(\text{C}_8\text{H}_{10})(\text{dppe})]$  complexes **4** and **5** in  $\text{C}_6\text{D}_6$  ( $^1\text{H}$  peak multiplicities for  $^{31}\text{P}$ -decoupled spectra).

| Compound <b>4</b>                       |                                                                                                                                                                                                                                                                                                                                                            | Compound <b>5</b>                                    |                                                                                                                                                                                                                                                                                                                                                            |
|-----------------------------------------|------------------------------------------------------------------------------------------------------------------------------------------------------------------------------------------------------------------------------------------------------------------------------------------------------------------------------------------------------------|------------------------------------------------------|------------------------------------------------------------------------------------------------------------------------------------------------------------------------------------------------------------------------------------------------------------------------------------------------------------------------------------------------------------|
|                                         |                                                                                                                                                                                                                                                                                                                                                            |                                                      |                                                                                                                                                                                                                                                                                                                                                            |
| <b><math>^1\text{H}</math></b>          |                                                                                                                                                                                                                                                                                                                                                            |                                                      |                                                                                                                                                                                                                                                                                                                                                            |
| Ph                                      | 8.11 ( $o_{B,\text{up}}$ ), 8.09 ( $o_{A,\text{down}}$ ), 7.55 ( $o_{A,\text{up}}$ ), 7.25 ( $m_{A,\text{down}}$ ), 7.21 ( $p_{A,\text{down}}$ ), 7.15 ( $m_{B,\text{up}}$ ), 7.12 ( $p_{B,\text{up}}$ ), 7.05 ( $m_{A,\text{up}}$ ), 7.02 ( $p_{A,\text{up}}$ ), 6.92 ( $m_{B,\text{down}}$ ), 6.85 ( $o_{B,\text{down}}$ ), 6.85 ( $p_{B,\text{down}}$ ) | Ph                                                   | 7.96 ( $o_{A,\text{up}}$ ), 7.91 ( $o_{B,\text{up}}$ ), 7.84 ( $o_{B,\text{down}}$ ), 7.19 ( $m_{B,\text{down}}$ ), 7.12 ( $p_{B,\text{down}}$ ), 7.11 ( $m_{A,\text{up}}$ ), 7.08 ( $m_{B,\text{up}}$ ), 7.07 ( $p_{A,\text{up}}$ ), 7.01 ( $p_{B,\text{up}}$ ), 6.90 ( $m_{A,\text{down}}$ ), 6.88 ( $o_{A,\text{down}}$ ), 6.86 ( $p_{A,\text{down}}$ ) |
| $\text{C}_8\text{H}_{10}$ C-H (olefin)  | 5.47 (dd, $J_{\text{HH}} = 4$ , 6.4 Hz) ( <i>a</i> )<br>5.94 (dd, $J_{\text{HH}} = 4$ , 6.4 with $J_{\text{PH}} = 4$ Hz) ( <i>b</i> )                                                                                                                                                                                                                      | $\text{C}_8\text{H}_{10}$ C-H (olefin)               | 5.61 (dd, $J_{\text{HH}} = 4$ , 7 Hz) ( <i>a</i> )<br>5.52 (dd, $J_{\text{HH}} = 4$ , 8 Hz) ( <i>b</i> )                                                                                                                                                                                                                                                   |
| $\text{C}_8\text{H}_{10}$ C-H (allyl)   | 4.98 (dd, $J_{\text{HH}} = 4$ , 7 with $J_{\text{PH}} = 4$ Hz) ( <i>c</i> )<br>3.79 (t, $J_{\text{HH}} = 7$ with $J_{\text{PH}} = 7$ Hz) ( <i>d</i> )<br>5.02 (m) ( <i>e</i> )                                                                                                                                                                             | $\text{C}_8\text{H}_{10}$ C-H (allyl)                | 4.31 (dd, $J_{\text{HH}} = 4$ , 8 Hz) ( <i>c</i> )<br>3.83 (t, $J_{\text{HH}} = 8$ with $J_{\text{PH}} = 8$ Hz) ( <i>d</i> )<br>5.11 (dd, $J_{\text{HH}} = 8$ , 4 Hz) ( <i>e</i> )                                                                                                                                                                         |
| $\text{C}_8\text{H}_{10}$ $\text{CH}_2$ | 2.14 ( $_{\text{up}}$ ), 1.98 ( $_{\text{down}}$ ) ( <i>f</i> )<br>1.96 ( $_{\text{up}}$ ), 2.41 ( $_{\text{down}}$ ) ( <i>g</i> )                                                                                                                                                                                                                         | $\text{C}_8\text{H}_{10}$ $\text{CH}_2$ ( <i>f</i> ) | 2.43, 2.12 ( <i>f</i> )<br>2.82, 2.12 ( <i>g</i> )                                                                                                                                                                                                                                                                                                         |
| $\text{C}_8\text{H}_{10}$ Ir-C-H        | 2.59 br                                                                                                                                                                                                                                                                                                                                                    | $\text{C}_8\text{H}_{10}$ Ir-C-H                     | 2.78 br                                                                                                                                                                                                                                                                                                                                                    |
| dppe $\text{CH}_2$                      | 2.48 ( $_{\text{down}}$ ), 1.80 ( $_{\text{up}}$ ) ( <i>j</i> )<br>2.15, 1.26 ( <i>k</i> )                                                                                                                                                                                                                                                                 | dppe $\text{CH}_2$                                   | 2.51 ( $_{\text{down}}$ ), 1.89 ( $_{\text{up}}$ ) ( <i>j</i> )<br>1.89, 1.85 ( <i>k</i> )                                                                                                                                                                                                                                                                 |
| Ir-H                                    | -11.43 (dd, $J_{\text{HPB}} = 14.1$ , $J_{\text{HPA}} = 21.8$ Hz)                                                                                                                                                                                                                                                                                          | Ir-H                                                 | -11.57 (t, $J_{\text{HP}} = 19.5$ Hz)                                                                                                                                                                                                                                                                                                                      |

Table S 4 (contd)

| Compound <b>4</b> | Compound <b>5</b> |
|-------------------|-------------------|
|-------------------|-------------------|

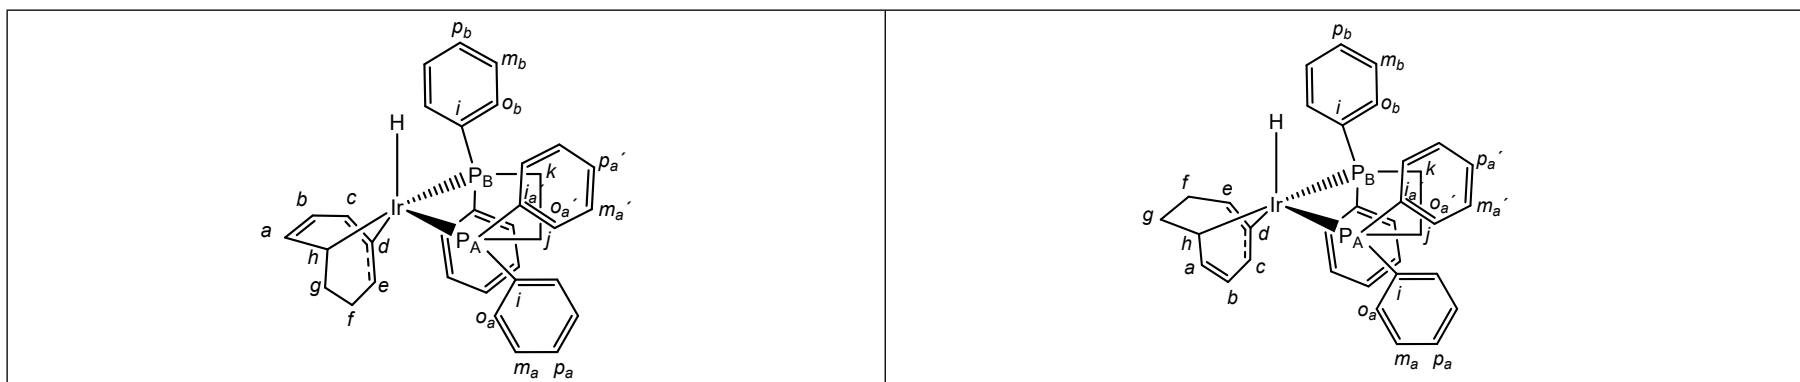

| <b><sup>13</sup>C</b>                          |                                                                                                                                                                                                                                                                                                                                                                                                                                                                                  |                                                |                                                                                                                                                                                                                                                                                                                                                                                                                                                                                                                            |
|------------------------------------------------|----------------------------------------------------------------------------------------------------------------------------------------------------------------------------------------------------------------------------------------------------------------------------------------------------------------------------------------------------------------------------------------------------------------------------------------------------------------------------------|------------------------------------------------|----------------------------------------------------------------------------------------------------------------------------------------------------------------------------------------------------------------------------------------------------------------------------------------------------------------------------------------------------------------------------------------------------------------------------------------------------------------------------------------------------------------------------|
| Ph                                             | <sup>a</sup><br>136.07 ( <i>o<sub>B,up</sub></i> ), 135.36 ( <i>o<sub>A,down</sub></i> ), 132.04 ( <i>o<sub>A,up</sub></i> ), 130.29 ( <i>p<sub>A,down</sub></i> ),<br>130.78 ( <i>o<sub>B,down</sub></i> ), 130.04 ( <i>p<sub>B,up</sub></i> ), 128.97 ( <i>p<sub>A,up</sub></i> ), 128.27 ( <i>p<sub>B,down</sub></i> ),<br>128.06 ( <i>m<sub>B,up</sub></i> ), 128.06 ( <i>m<sub>A,down</sub></i> ), 127.73 ( <i>m<sub>B,down</sub></i> ), 127.62 ( <i>m<sub>A,up</sub></i> ) | Ph                                             | 135.0, 133.0, 135.1, 130.9 ( <i>i, i', i'', i'''</i> )<br>134.98 ( <i>o<sub>A,up</sub></i> ), 133.28 ( <i>o<sub>B,up</sub></i> ), 132.72 ( <i>o<sub>B,down</sub></i> ), 130.78 ( <i>o<sub>A,down</sub></i> ),<br>129.80 ( <i>p<sub>A,up</sub></i> ), 129.38 ( <i>p<sub>B,up</sub></i> ), 129.25 ( <i>p<sub>B,down</sub></i> ), 128.40 ( <i>p<sub>A,down</sub></i> ),<br>127.98 ( <i>m<sub>B,up</sub></i> ), 127.90 ( <i>m<sub>A,up</sub></i> ), 127.78 ( <i>m<sub>A,down</sub></i> ), 126.67 ( <i>m<sub>B,down</sub></i> ) |
| C <sub>8</sub> H <sub>10</sub> C-H (olefin)    | 146.42 ( <i>a</i> )<br>129.90 ( <i>b</i> )                                                                                                                                                                                                                                                                                                                                                                                                                                       | C <sub>8</sub> H <sub>10</sub> C-H (olefin)    | 127.5 ( <i>a</i> )<br>148.1 ( <i>b</i> )                                                                                                                                                                                                                                                                                                                                                                                                                                                                                   |
| C <sub>8</sub> H <sub>10</sub> C-H (allyl)     | 62.5 ( <i>J<sub>PC</sub></i> = 50 Hz) ( <i>c</i> )<br>93.1 ( <i>d</i> )<br>72.4 ( <i>e</i> )                                                                                                                                                                                                                                                                                                                                                                                     | C <sub>8</sub> H <sub>10</sub> C-H (allyl)     | 73.3 ( <i>c</i> )<br>94.1 ( <i>d</i> )<br>62.88 d ( <i>J<sub>PC</sub></i> = 50 Hz) ( <i>e</i> )                                                                                                                                                                                                                                                                                                                                                                                                                            |
| C <sub>8</sub> H <sub>10</sub> CH <sub>2</sub> | 22.9 ( <i>f</i> )<br>54.3 ( <i>g</i> )                                                                                                                                                                                                                                                                                                                                                                                                                                           | C <sub>8</sub> H <sub>10</sub> CH <sub>2</sub> | 25.40 ( <i>f</i> )<br>52.06 ( <i>g</i> )                                                                                                                                                                                                                                                                                                                                                                                                                                                                                   |
| C <sub>8</sub> H <sub>10</sub> Ir-C-H          | 35.5 ( <i>J<sub>PC</sub></i> = 70 Hz) ( <i>h</i> )                                                                                                                                                                                                                                                                                                                                                                                                                               | C <sub>8</sub> H <sub>10</sub> Ir-C-H          | 34.47 ( <i>J<sub>PC</sub></i> = 70 Hz) ( <i>h</i> )                                                                                                                                                                                                                                                                                                                                                                                                                                                                        |
| dppe CH <sub>2</sub>                           | 35.10 ( <i>j</i> )<br>28.9 ( <i>k</i> )                                                                                                                                                                                                                                                                                                                                                                                                                                          | dppe CH <sub>2</sub>                           | 30.6 ( <i>j</i> )<br>33.79 ( <i>k</i> )                                                                                                                                                                                                                                                                                                                                                                                                                                                                                    |
| <b><sup>31</sup>P</b>                          |                                                                                                                                                                                                                                                                                                                                                                                                                                                                                  |                                                |                                                                                                                                                                                                                                                                                                                                                                                                                                                                                                                            |
| P <sub>A</sub>                                 | 30.6 (d, <i>J<sub>PP</sub></i> = 2.4)                                                                                                                                                                                                                                                                                                                                                                                                                                            |                                                | 32.4 (d, <i>J<sub>PP</sub></i> = 2.7)                                                                                                                                                                                                                                                                                                                                                                                                                                                                                      |
| P <sub>B</sub>                                 | 46.7 (d, <i>J<sub>PP</sub></i> = 2.4)                                                                                                                                                                                                                                                                                                                                                                                                                                            |                                                | 39.4 (d, <i>J<sub>PP</sub></i> = 2.7)                                                                                                                                                                                                                                                                                                                                                                                                                                                                                      |

<sup>a</sup>The assignment of the Ph *ipso* <sup>13</sup>C resonances of compound **4** was prevented by overlap with other major resonances.

## Comments on the NMR characterisation of **4** and **5**.

The *ortho*-phenyl protons on product **4** and **5** are readily identified as the downfield signals because they show a large difference in splitting when decoupled from  $^{31}\text{P}$ , resulting in doublet signals (Figure S 13 and Figure S 14). The phenyl region of the spectrum is quite crowded due to significant overlap for each isomer, possessing in total 20 H (and 24 C) signals for each isomer. Hence, the upfield phenyl region is much more difficult to distinguish the individual proton resonances, as many of the minor signals for **4** and, major signals for **5**, overlap. To identify the couplings, and indeed assign each proton, which is difficult on the sole basis of these  $^1\text{H}$  spectra,  $^{13}\text{C}$ - $^1\text{H}$  (Figure S 15) and  $^{31}\text{P}$ - $^1\text{H}$  (Figure S 17) HMQC, COSY (Figure S 16), and NOESY (Figure S 18) methods were used to support the analysis of each structure.

The 1-D NOESY experiments were used to probe the signals within the allyl region of the  $^1\text{H}$  NMR spectra, because the significant overlap between signals for **4** and **5** in the  $^1\text{H}$  NMR makes these signals difficult to distinguish with a single experiment. They were used to confirm the structure and binding of the  $\text{C}_8\text{H}_{10}$  ligands with  $\kappa^1, \eta^3$  binding. The through-space interactions between the olefinic protons and the CH groups provided insight into the  $\text{C}_8\text{H}_{10}$  ligand arrangement. The COSY spectrum (Figure S 16) allowed full characterization and assignment of the  $\text{sp}^2$  hybridised protons.

In the  $^{13}\text{C}$ - $^1\text{H}$  HMQC spectrum, four proton resonances in the 5 – 6 ppm region correlate with downfield shifted carbon signals. These signals arise from the two unbound alkene moieties of **4** and **5**. The combination of the HMQC spectra (Figure S 15, Figure S 17) alongside selective 1D-NOESY (Figure S 18) and COSY (Figure S 16) experiments aided the assignment of all resonances, as reported in Table S 4.

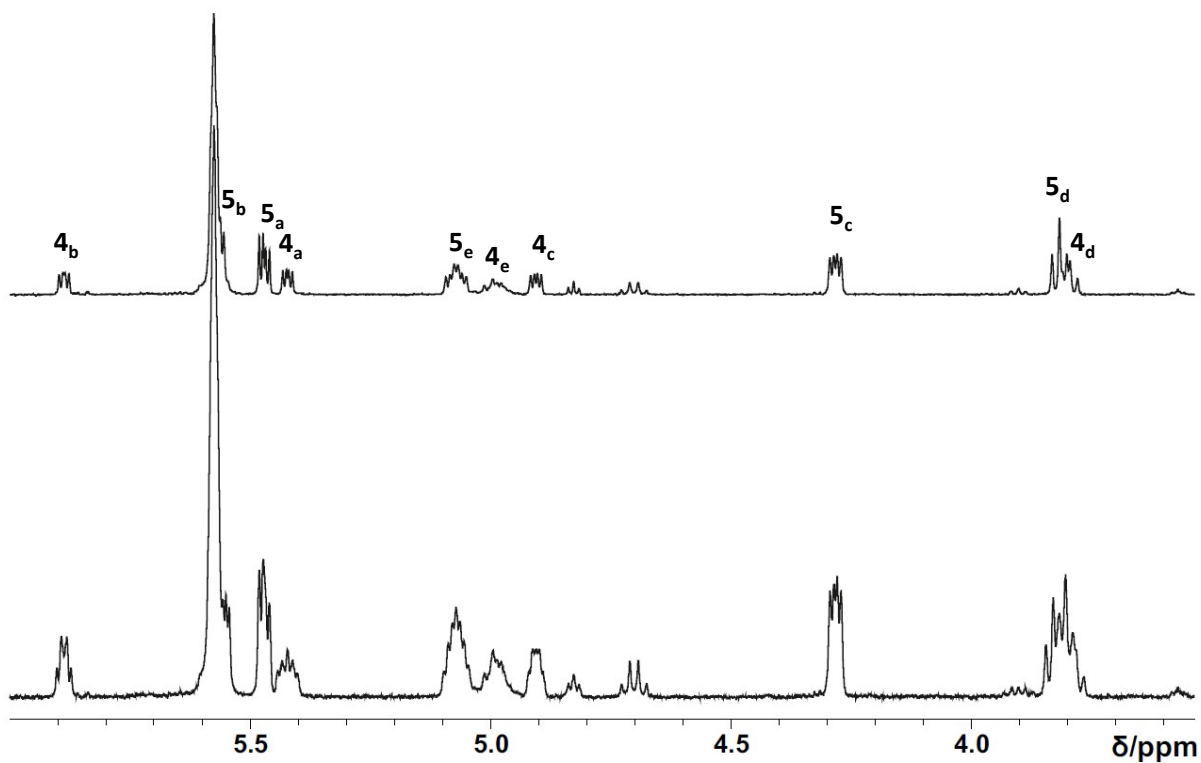

Figure S 13.  $^1H\{^{31}P\}$  (above) and  $^1H$  (below) spectra of the alkene region for the mixture of product 4 and 5 in  $C_7D_8$ .

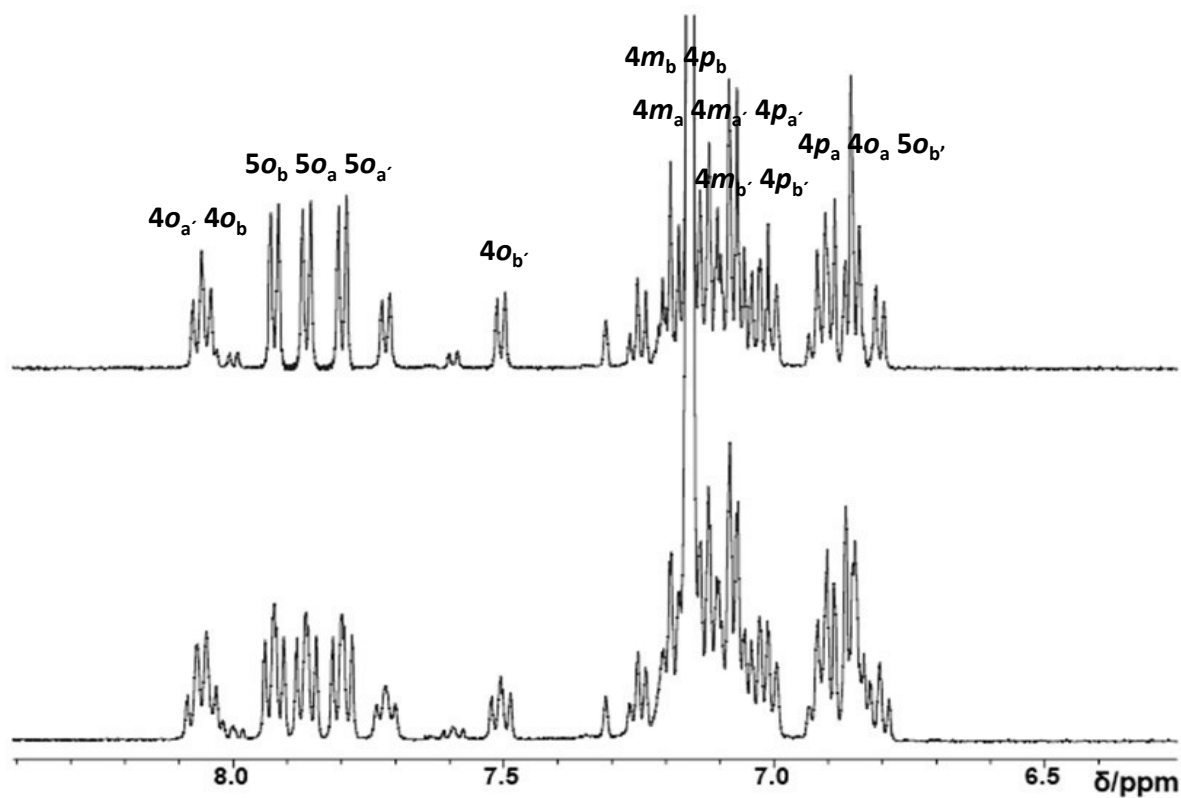

Figure S 14.  $^1H\{^{31}P\}$  (above) and  $^1H$  (below) spectra of the phenyl region for the mixture of products 4 and 5 in  $C_6D_6$ .

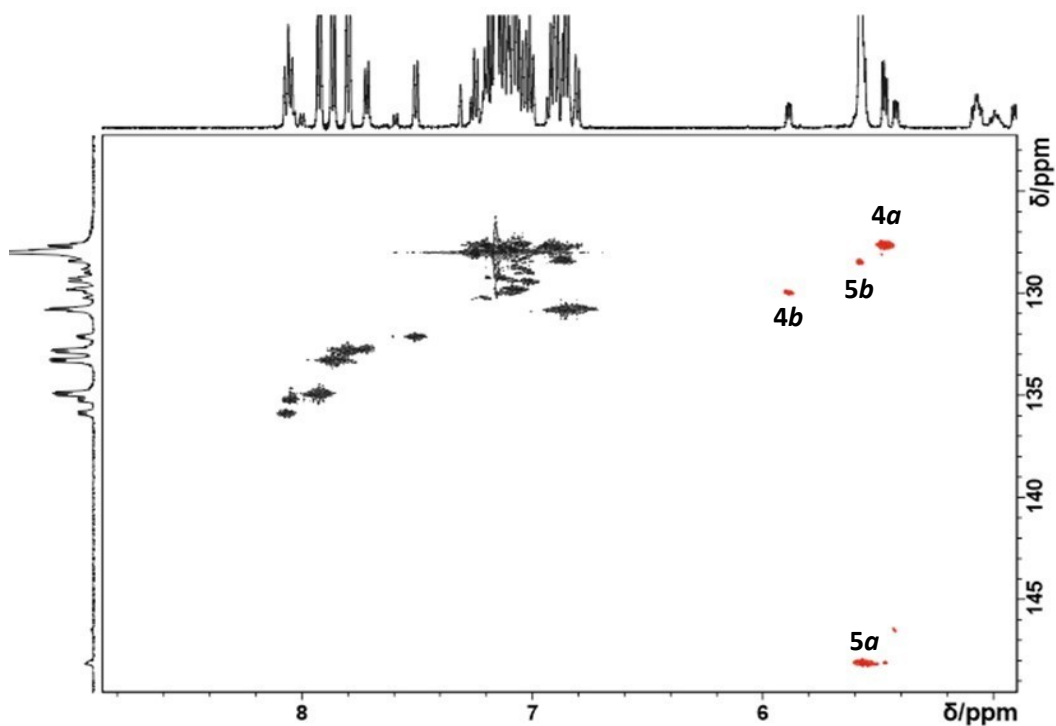

Figure S 15. Excerpt of the  $^{13}\text{C}$ - $^1\text{H}$  HMQC NMR spectrum of the mixture of products **4** and **5** in  $\text{C}_6\text{D}_6$  in the  $\text{sp}^2$  CH resonance region. The unbound alkene groups are highlighted in red.

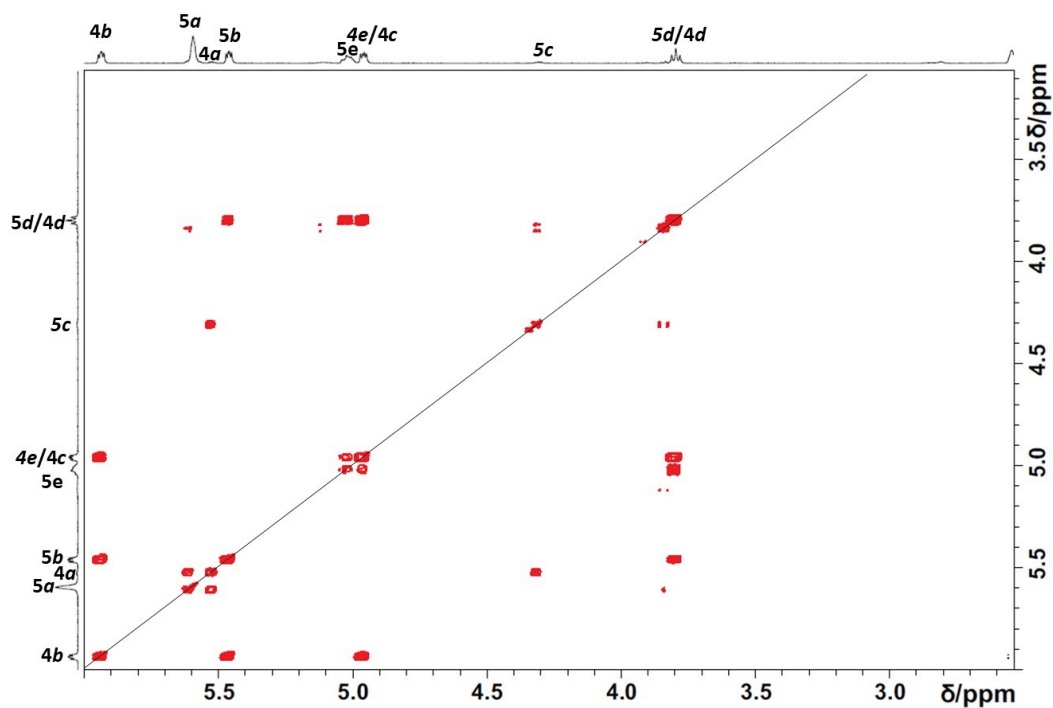

Figure S 16.  $^{31}\text{P}$ -decoupled H-H COSY spectrum of the mixture of products **4** and **5** in  $\text{C}_6\text{D}_6$  in the  $\text{sp}^2$ -CH region.



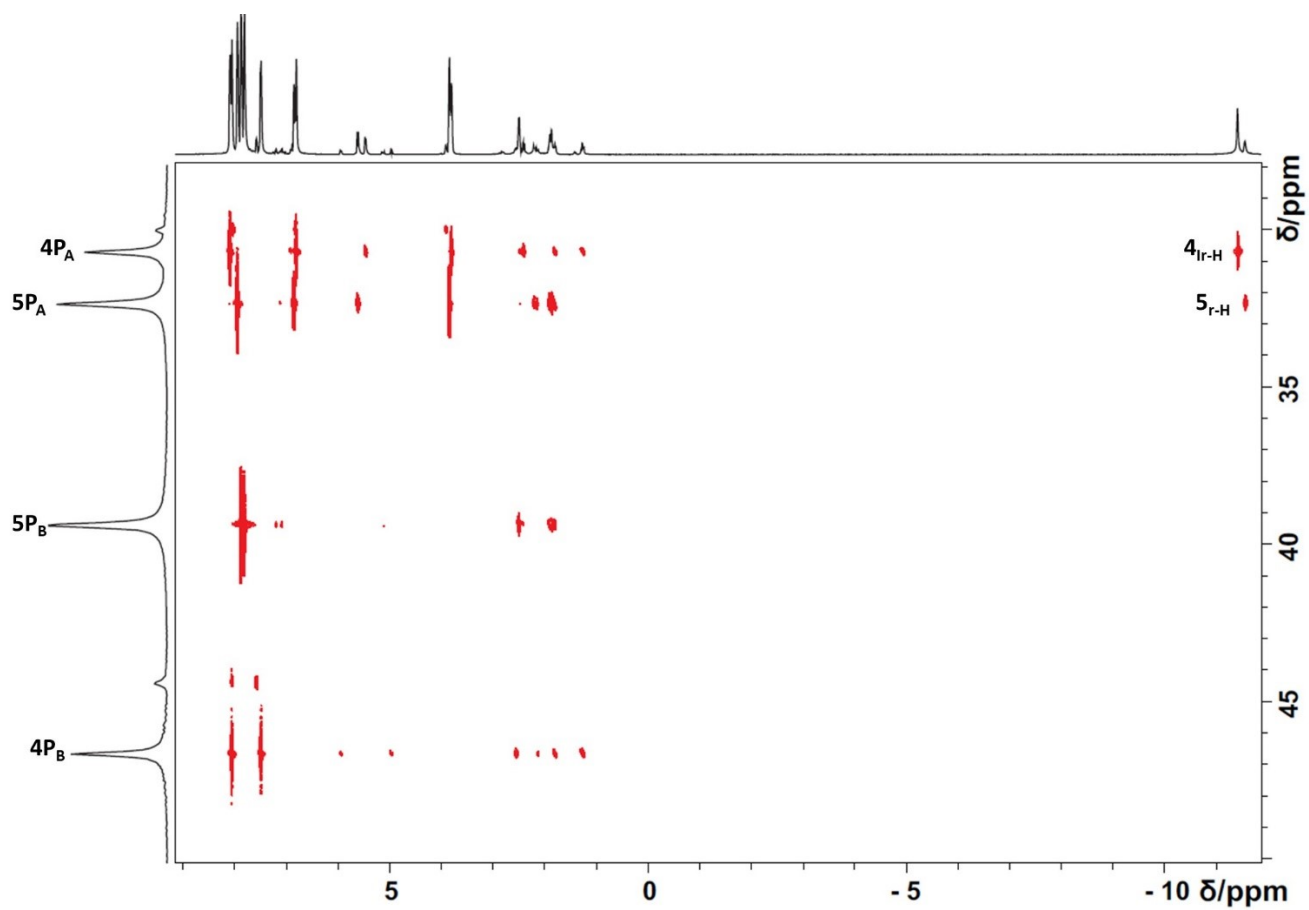

Figure S 17.  $^{31}\text{P}$ - $^1\text{H}$  HMQC spectrum of **4** and **5** in  $\text{C}_6\text{D}_6$  at 298 K.

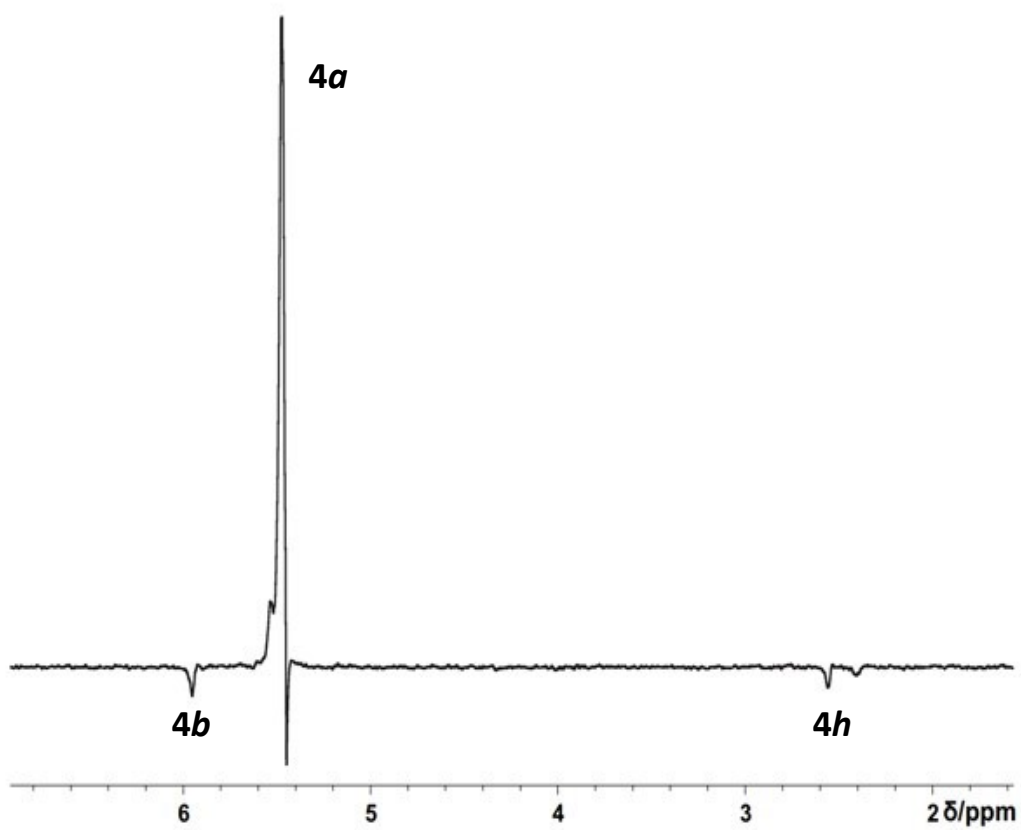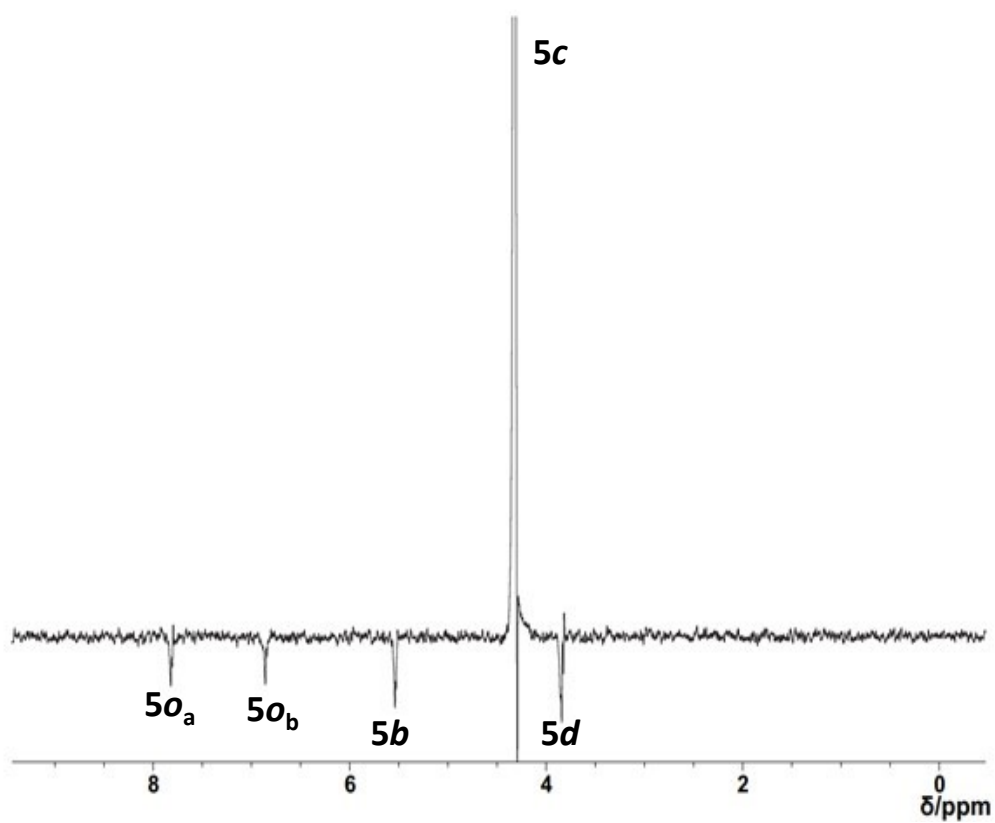

Figure S 18. NOE spectra highlighting the interaction between the alkene and allylic protons for **4** and **5**.

### Kinetic analysis of the equilibrated transformation of 4 to 5

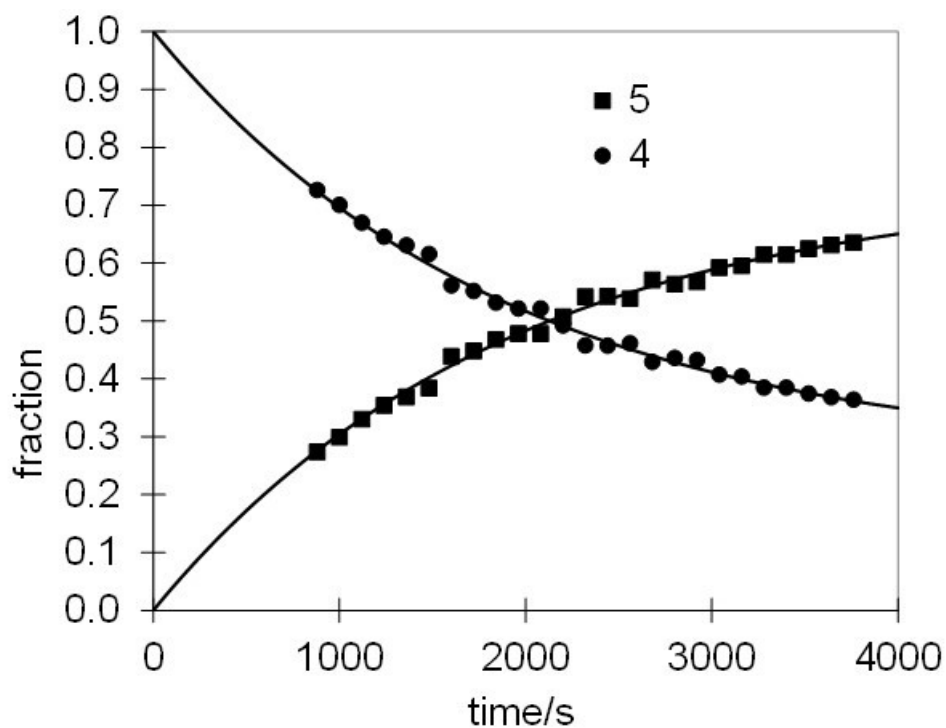

Figure S 19. First-order kinetic analysis of the  $^1\text{H}$  data for the 4-5 isomerisation in toluene- $d_8$  at 298 K.

### Energy profile for the isomerisation of II'

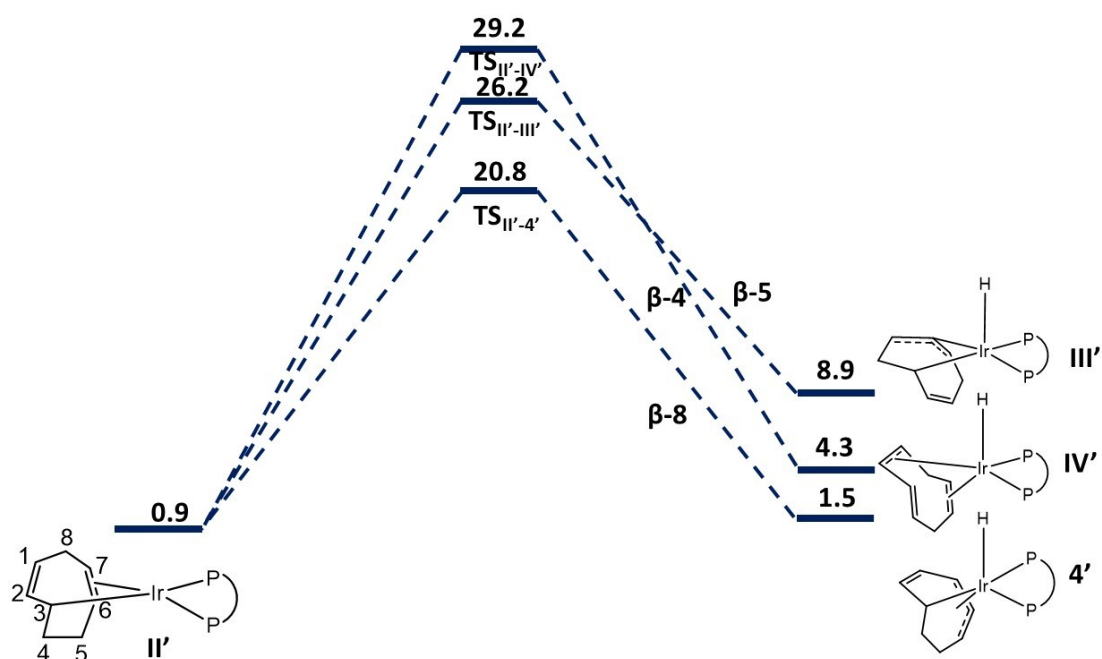

Figure S 20. Gibbs-energy profile (in  $\text{kcal mol}^{-1}$ ) for the  $\beta$ -H elimination reactions from intermediate II'.

Analysis of the NMR spectra of the  $[\text{IrH}_4(\text{dppe})]^-$  anion.

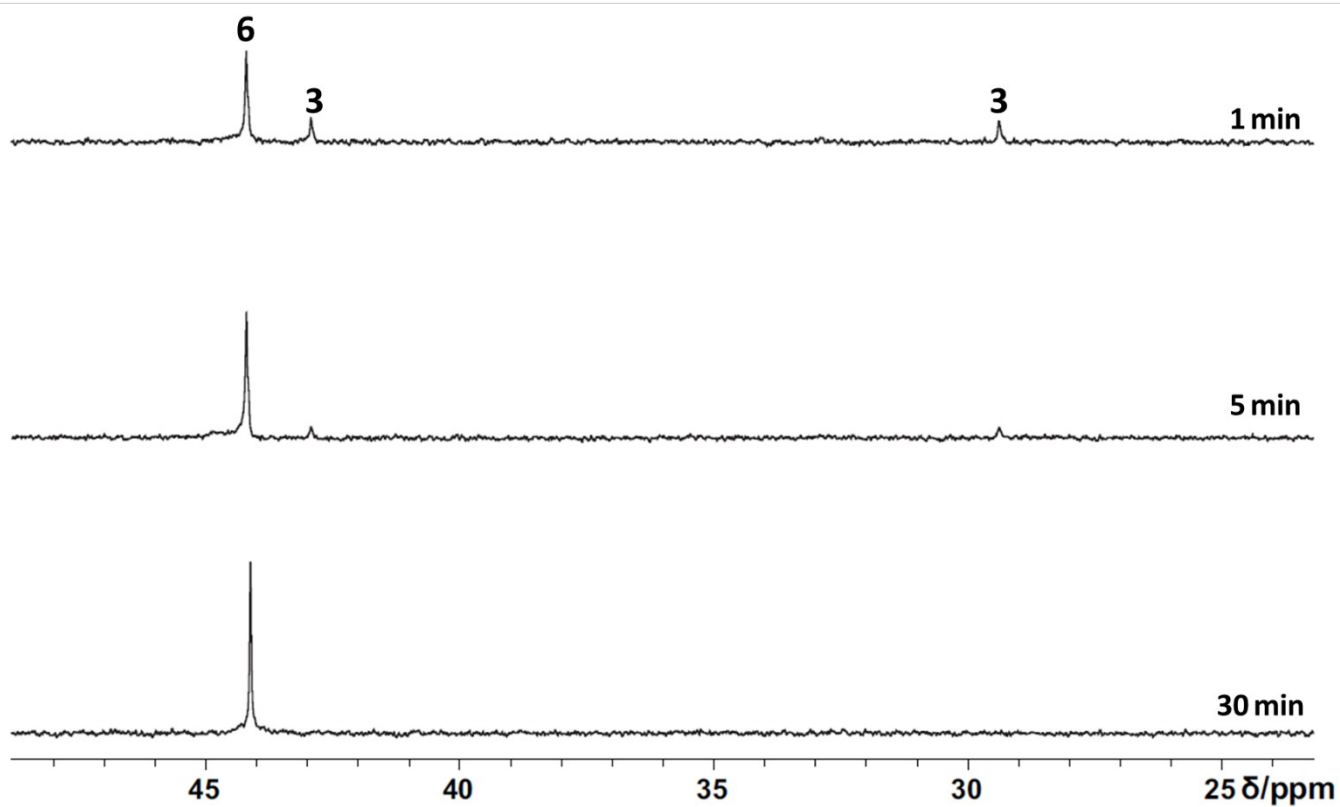

Figure S 21.  $^{31}\text{P}\{^1\text{H}\}$  NMR monitoring of the formation of **6** from a solution of **2/3** in  $\text{C}_7\text{D}_8$  at 353 K. The resonance of **2** is not visible because of the low concentration.

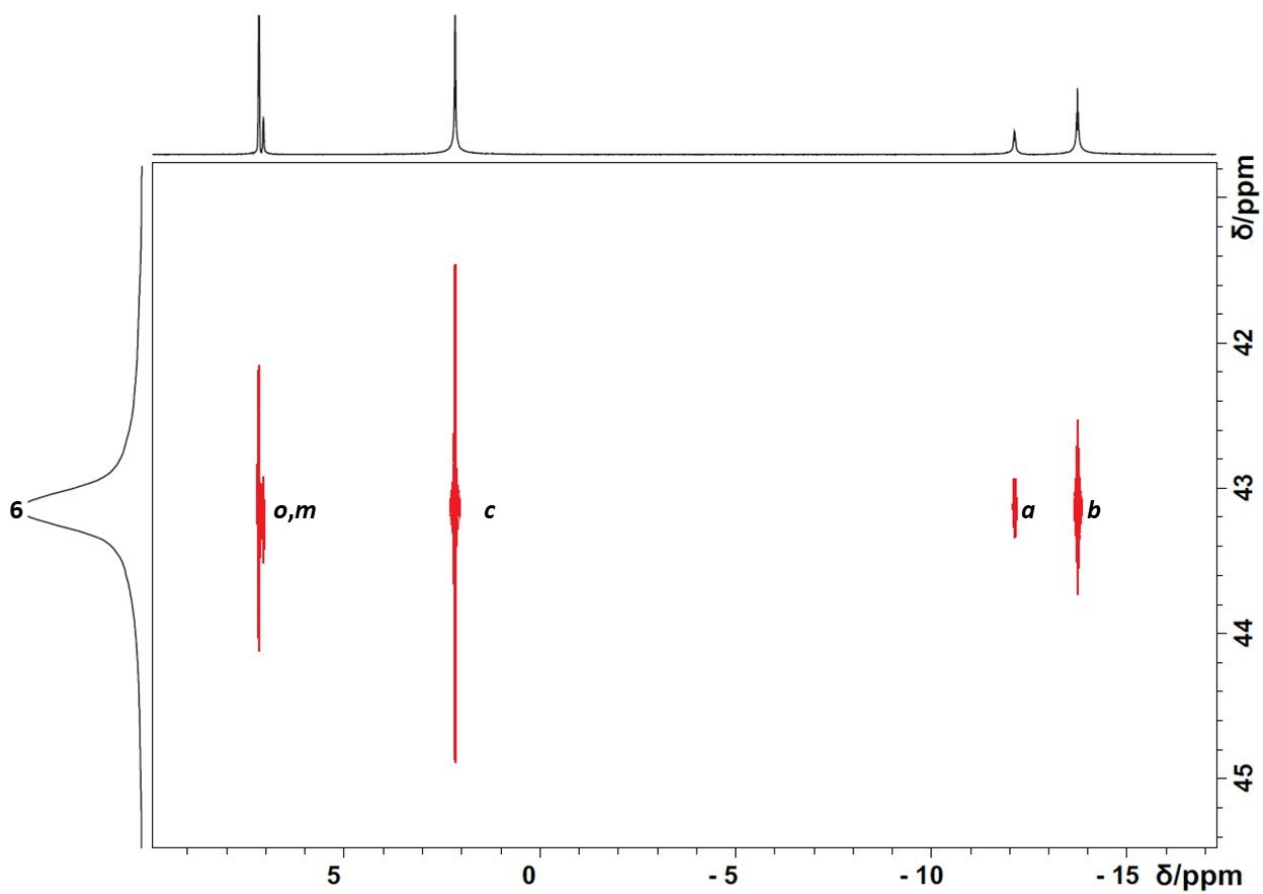

Figure S 22.  $^{31}\text{P}$ - $^1\text{H}$  HMQC spectrum of **6** in  $\text{C}_7\text{D}_8$  at 298 K, highlighting the proton phosphorus interactions.

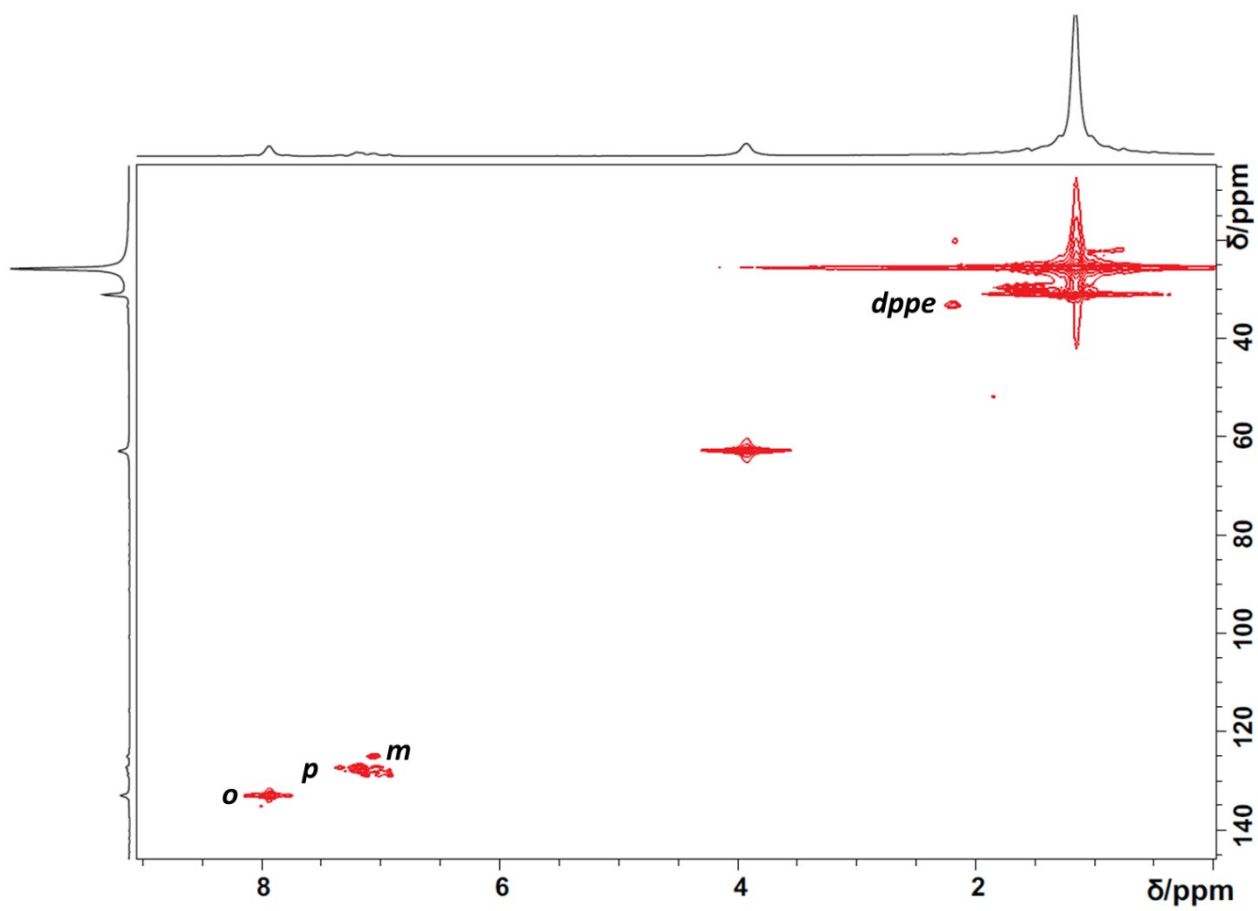

Figure S 23.  $^{13}\text{C}$ - $^1\text{H}$  HMQC spectrum of **6** in  $\text{C}_7\text{D}_8$  at 298 K.

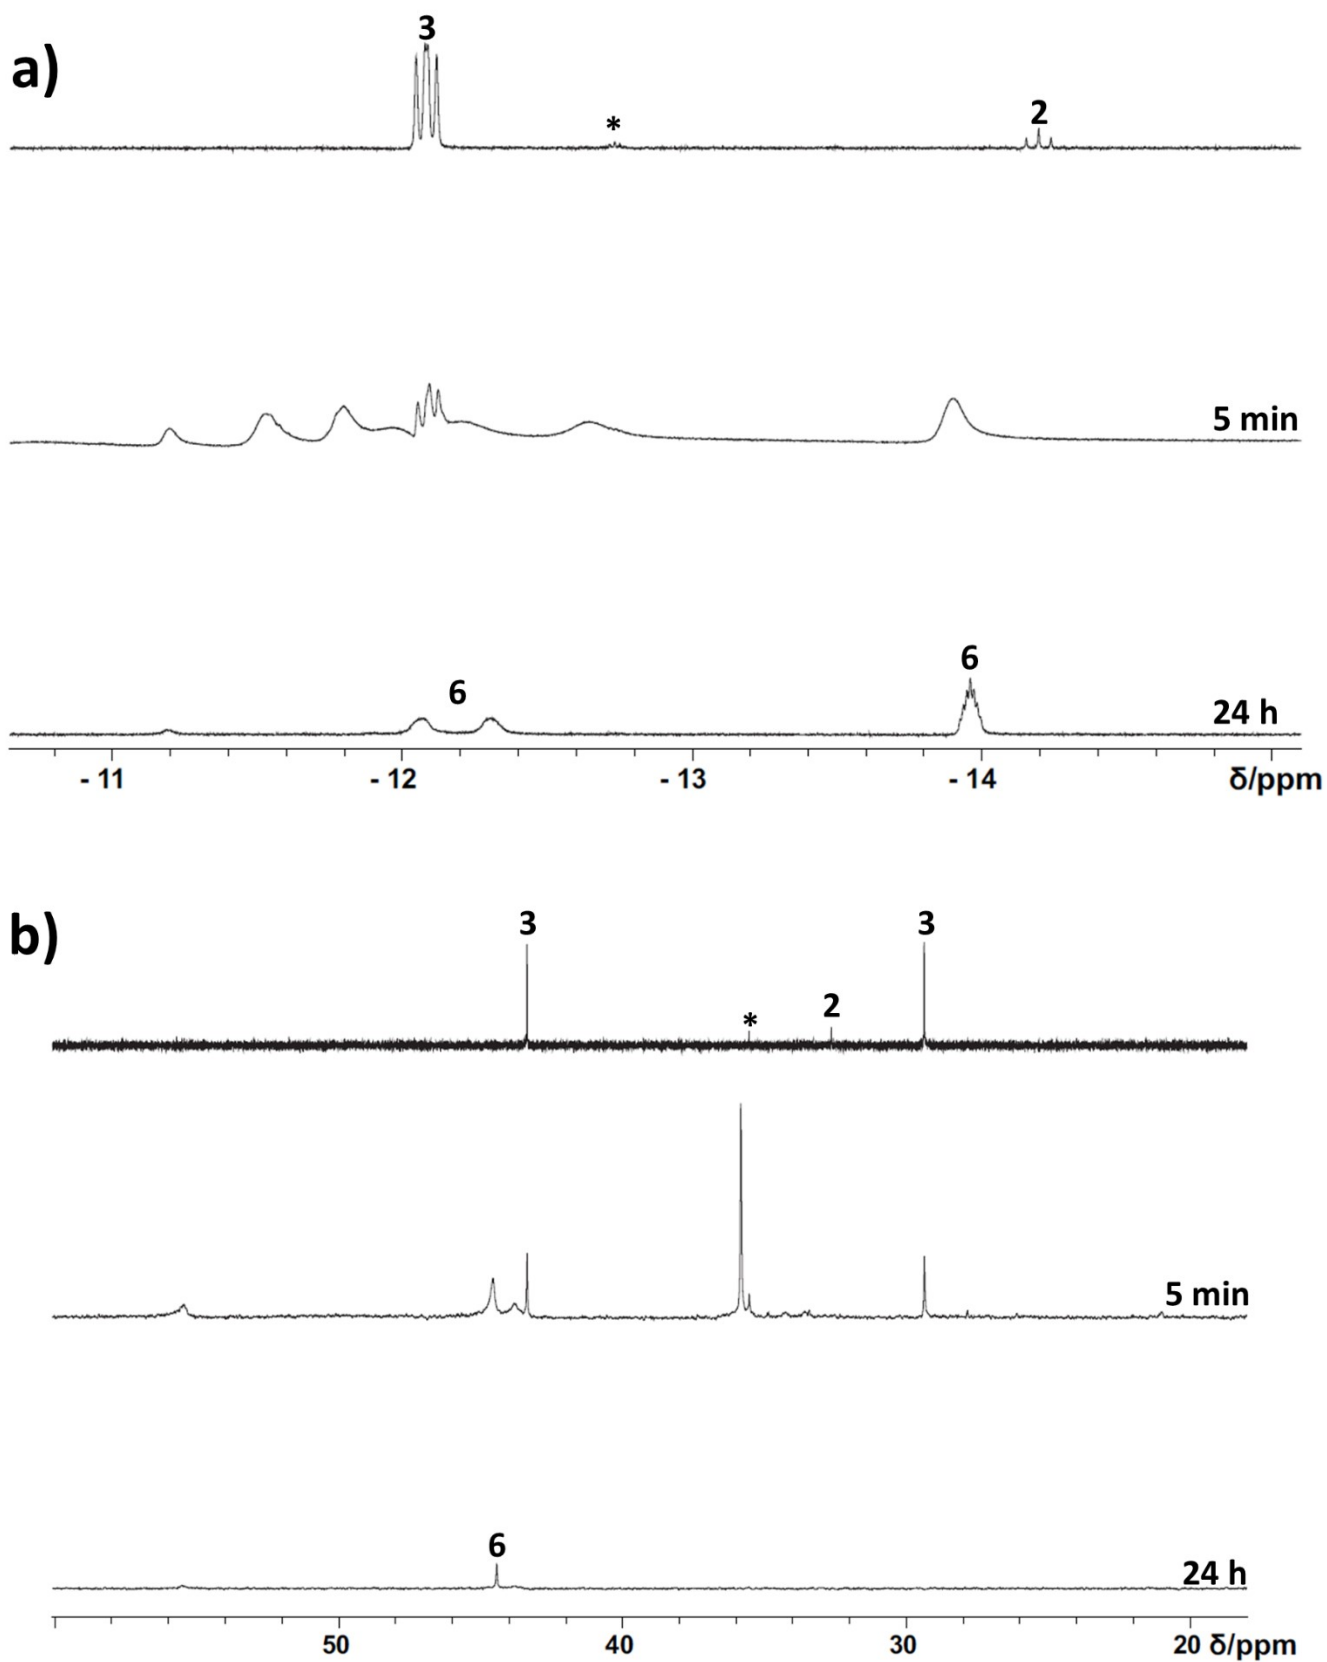

Figure S 24.  $^1\text{H}$  (a) and  $^{31}\text{P}\{^1\text{H}\}$  (b) NMR study of the interaction of **2/3** with  $\text{H}_2$  in  $\text{THF-}d_8$  at room temperature. Three bars of  $\text{H}_2$  were first added, followed by 5 equivalents of  $\text{KO}^t\text{Bu}$ .

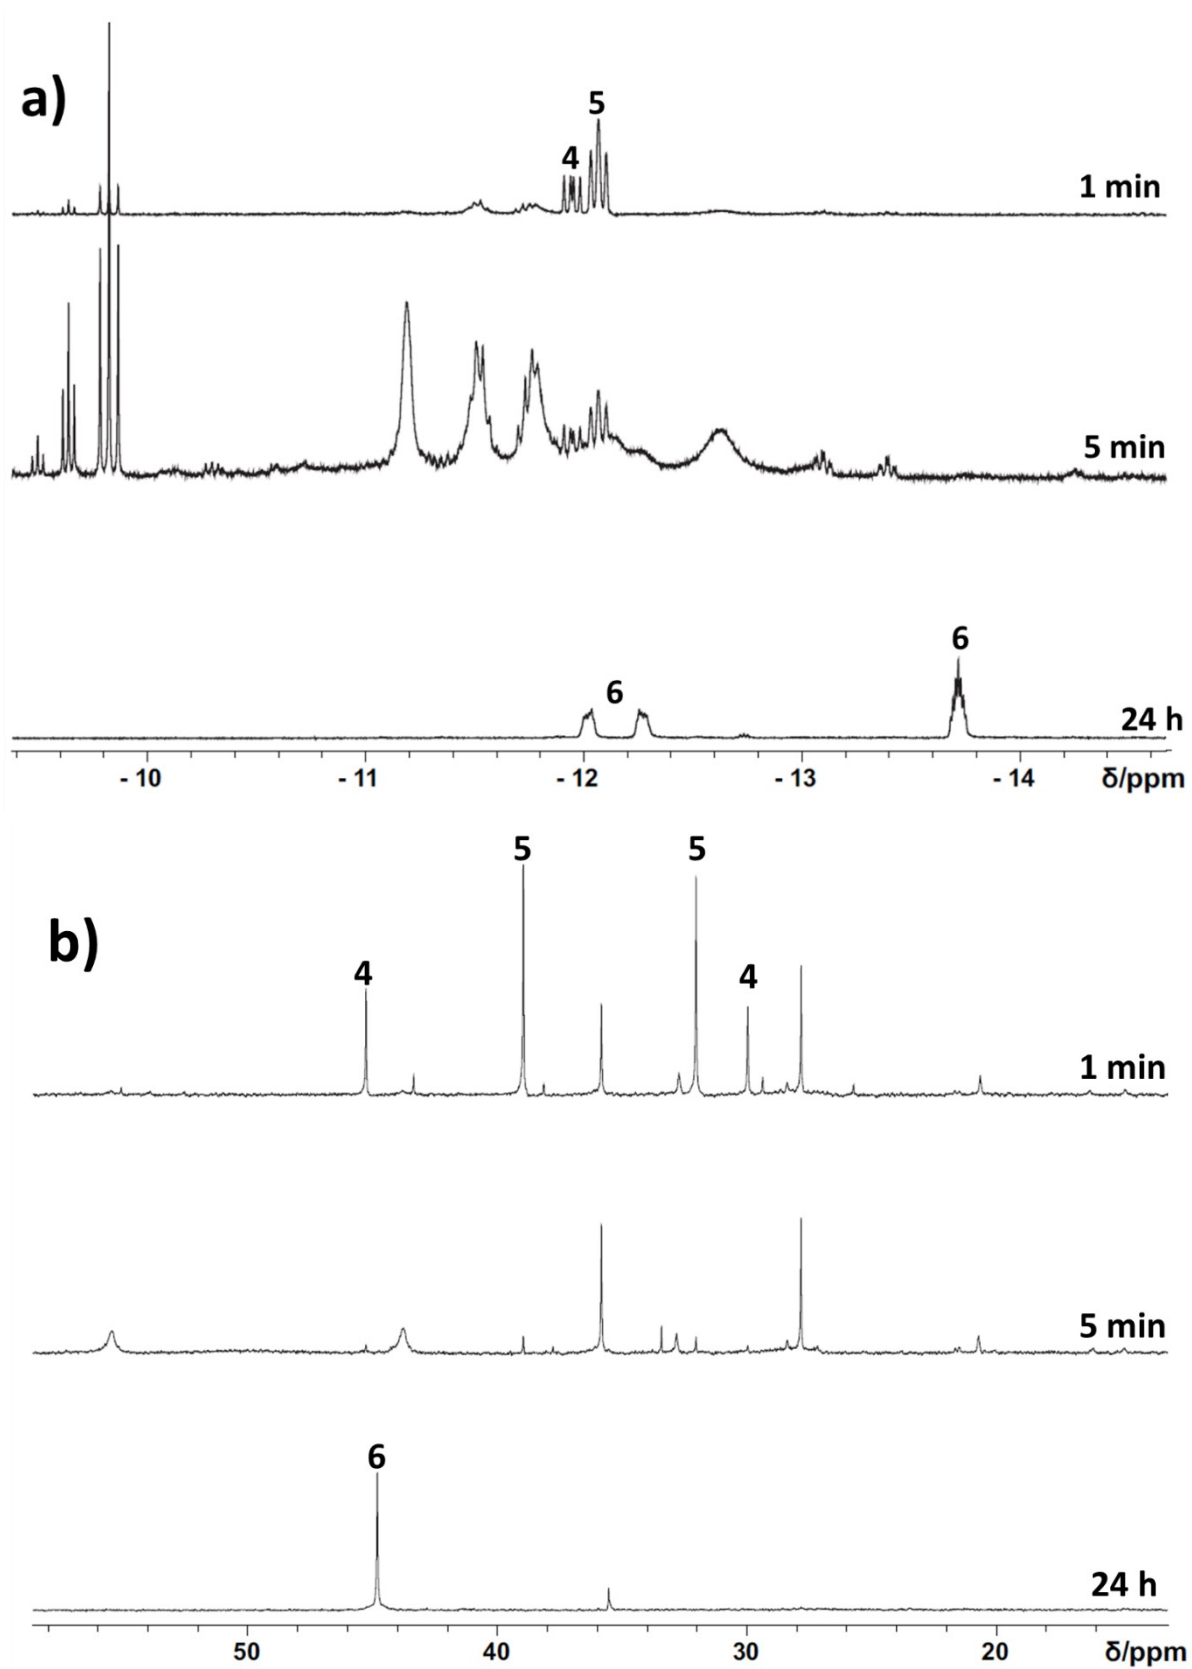

Figure S 25. <sup>1</sup>H (a) and <sup>31</sup>P{<sup>1</sup>H} (b) NMR study of the interaction of **4/5** with H<sub>2</sub> in THF-*d*<sub>8</sub> at room temperature. Three bars of H<sub>2</sub> were first added, followed by 5 equivalents of KO<sup>*t*</sup>Bu.



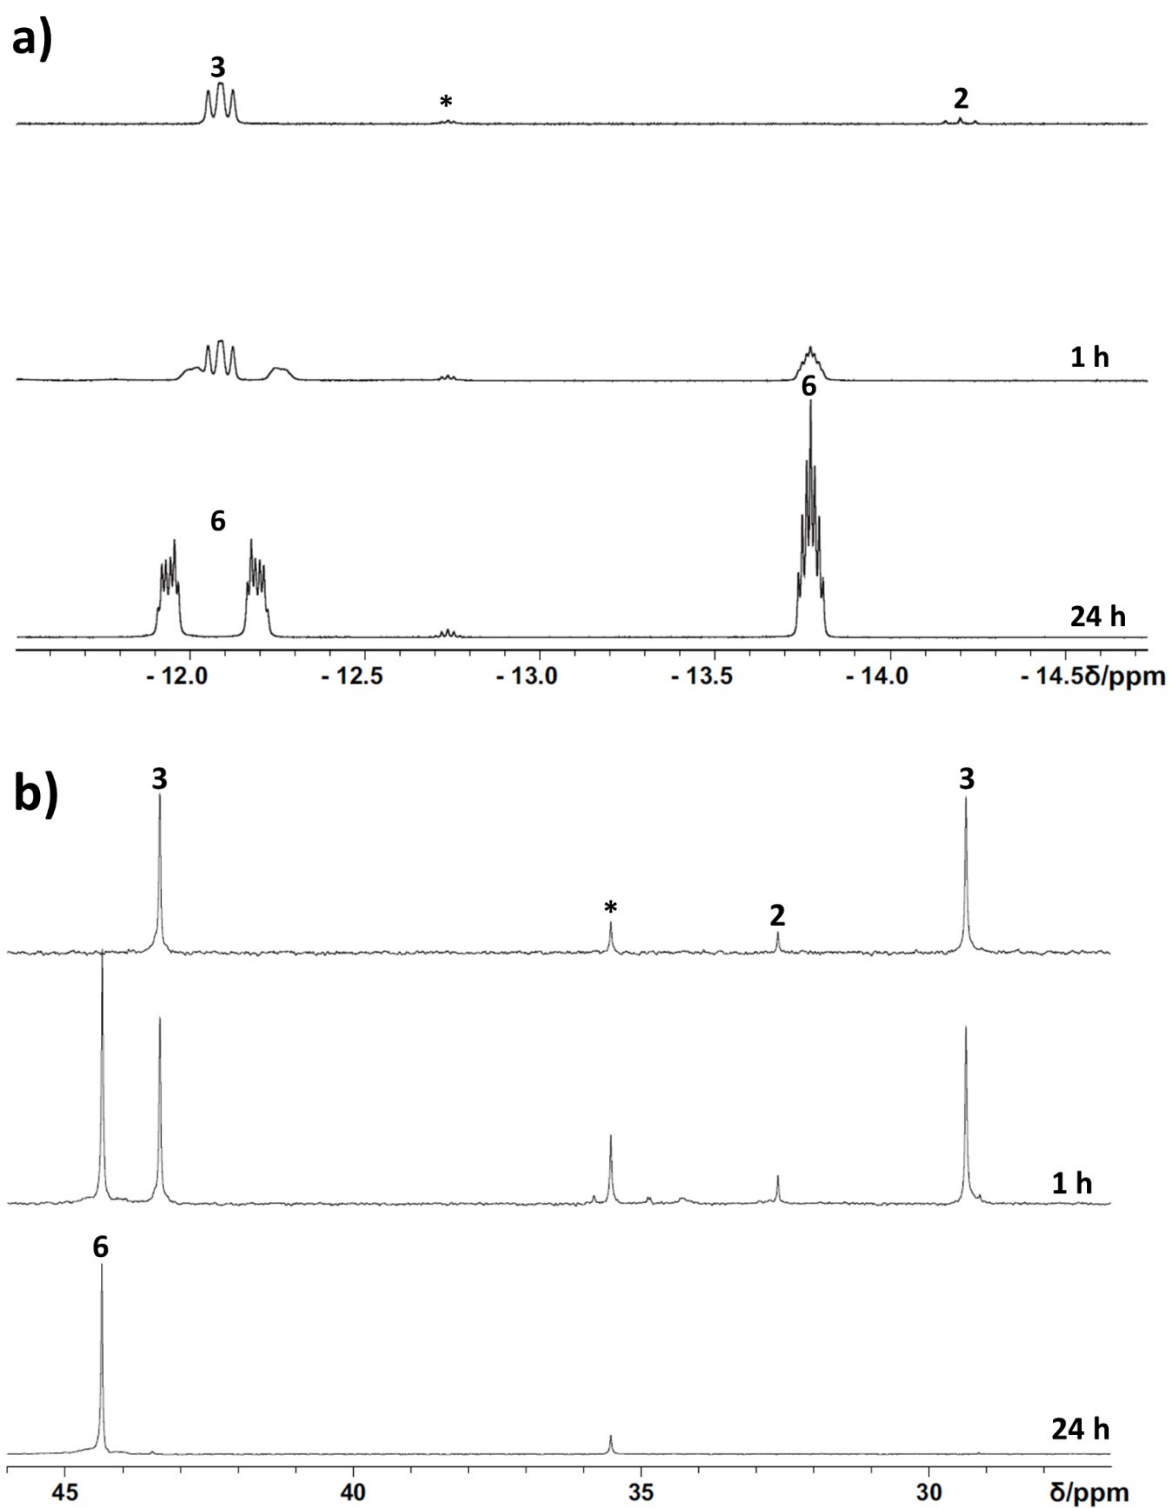

Figure S 26.  $^1\text{H}$  (a) and  $^{31}\text{P}\{^1\text{H}\}$  (b) NMR study of the interaction of **2/3** with  $\text{H}_2$  in  $\text{THF-}d_8$  at room temperature. Five equivalents of  $\text{KO}^t\text{Bu}$  were first added, followed by 3 bars of  $\text{H}_2$ .

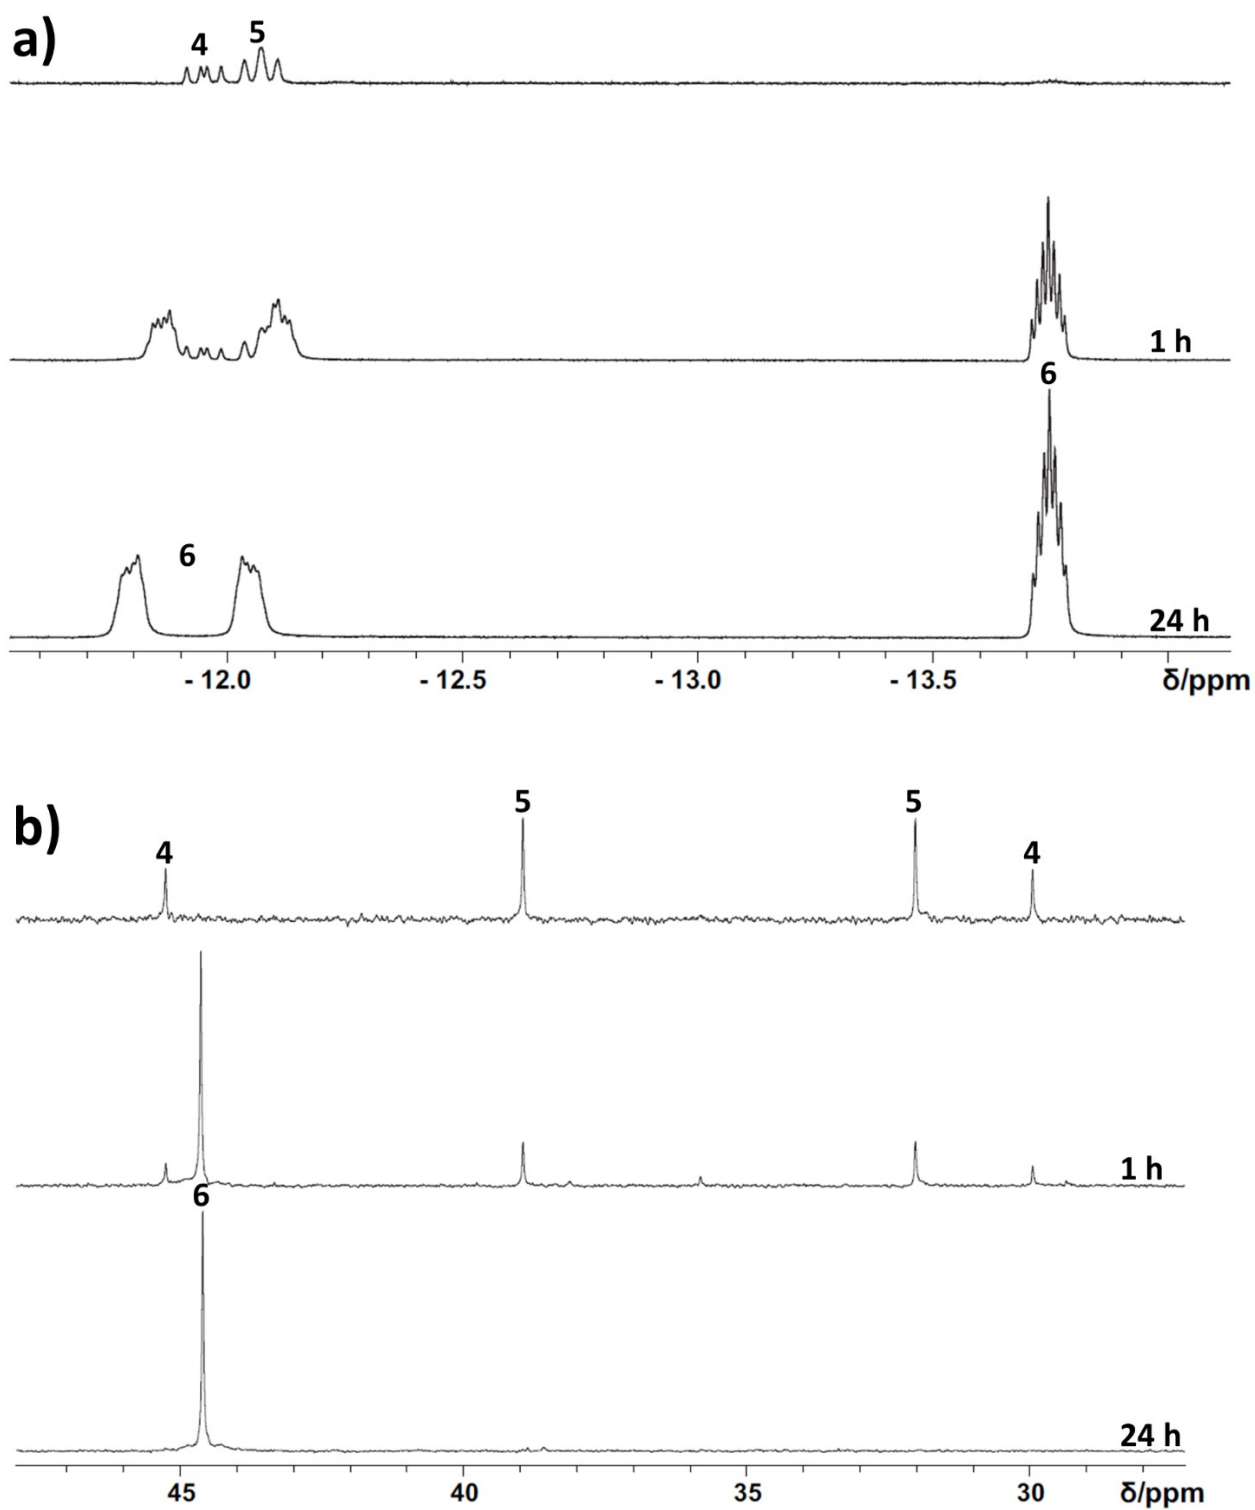

Table S 5. NMR properties of  $K^+[IrH_4(dppe)]^-$  (**6**) in  $C_6D_6$ .

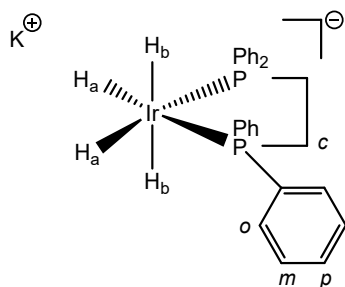

| <b><math>^1H</math></b>    |                                                                                                                                                             |
|----------------------------|-------------------------------------------------------------------------------------------------------------------------------------------------------------|
| Ph                         | 7.98 (dd, $J_{HH} = 7.6$ ) ( <i>o</i> )<br>7.26 (t, $J_{HH} = 7.4$ ) ( <i>m</i> )<br>7.17 (dd, $J_{HH} = 7.6$ ) ( <i>p</i> )                                |
| dppe CH <sub>2</sub>       | 2.20 ( $J_{HH} = 5.5$ )                                                                                                                                     |
| Ir-H                       | -12.12 ( $J_{HH'} = 6.0, J_{HHb} = 5.7, J_{HPcis} = -15.2, J_{HPtrans} = 121.6$ ) ( <i>a</i> )<br>-13.80 ( $J_{HHa} = 5.7, J_{HPcis} = 17.8$ ) ( <i>b</i> ) |
| <b><math>^{13}C</math></b> |                                                                                                                                                             |
| Ph                         | 133.1 ( <i>o</i> )<br>126.8 ( <i>m</i> )<br>127.8 ( <i>p</i> )                                                                                              |
| dppe CH <sub>2</sub>       | 32.9                                                                                                                                                        |
| <b><math>^{31}P</math></b> |                                                                                                                                                             |
|                            | 44.4 (s)                                                                                                                                                    |

## DFT-optimized geometries.

Table S 6. Energies (hartrees), views and Cartesian coordinates (Å) of all optimized geometries.

### [IrH(1,2,5,6- $\eta^2$ : $\eta^2$ -COD)(dppe)] (Compound 2)

E (BS1) = -2105.218792

E (BS2) = -2105.73709

G<sub>298.15,1M</sub> (BS2) = -2105.18585

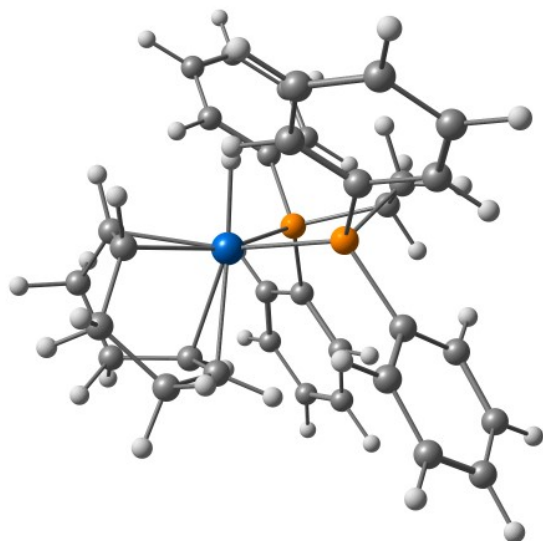

|    |              |              |              |
|----|--------------|--------------|--------------|
| 1  | -2.382684000 | -2.561653000 | 0.457238000  |
| 1  | -4.016064000 | 0.000466000  | -2.581392000 |
| 1  | -4.291224000 | -4.131245000 | 0.157793000  |
| 1  | -5.908943000 | -1.558056000 | -2.888595000 |
| 1  | -6.057702000 | -3.627962000 | -1.518800000 |
| 6  | -2.396504000 | 1.585385000  | -0.922909000 |
| 6  | -3.445181000 | 1.878942000  | -0.032840000 |
| 6  | -1.935945000 | 2.604748000  | -1.770852000 |
| 6  | -4.009459000 | 3.152847000  | 0.011475000  |
| 6  | -2.500718000 | 3.882352000  | -1.724860000 |
| 6  | -3.535617000 | 4.161951000  | -0.831926000 |
| 1  | -3.828150000 | 1.100358000  | 0.620443000  |
| 1  | -1.141784000 | 2.410852000  | -2.483273000 |
| 1  | -4.821061000 | 3.357616000  | 0.704169000  |
| 1  | -2.132945000 | 4.655771000  | -2.393720000 |
| 1  | -3.974085000 | 5.155065000  | -0.796277000 |
| 1  | -0.710384000 | -1.382604000 | -2.618719000 |
| 6  | 0.677489000  | 0.279501000  | -2.498055000 |
| 1  | 1.258154000  | -0.162699000 | -3.312445000 |
| 1  | 0.661338000  | 1.358349000  | -2.670692000 |
| 15 | 1.568891000  | -0.010428000 | -0.853999000 |
| 6  | 2.851904000  | -1.257587000 | -1.316219000 |
| 6  | 2.977351000  | -2.428826000 | -0.558970000 |
| 6  | 3.713897000  | -1.058030000 | -2.408752000 |
| 6  | 3.940585000  | -3.386730000 | -0.888374000 |
| 6  | 4.674924000  | -2.013156000 | -2.737139000 |
| 6  | 4.788784000  | -3.181606000 | -1.976900000 |
| 1  | 2.312343000  | -2.580849000 | 0.284321000  |
| 1  | 3.645776000  | -0.145437000 | -2.995001000 |
| 1  | 4.025417000  | -4.291911000 | -0.293379000 |
| 1  | 5.335887000  | -1.846576000 | -3.583336000 |
| 1  | 5.537290000  | -3.926213000 | -2.233480000 |
| 6  | 2.559827000  | 1.535934000  | -0.666488000 |
| 6  | 1.905700000  | 2.778528000  | -0.743513000 |
| 6  | 3.911878000  | 1.513808000  | -0.290830000 |
| 6  | 2.592032000  | 3.964699000  | -0.483982000 |
| 6  | 4.596266000  | 2.702020000  | -0.025041000 |
| 6  | 3.942002000  | 3.931012000  | -0.125316000 |
| 1  | 0.847301000  | 2.823495000  | -0.984884000 |
| 1  | 4.436299000  | 0.567414000  | -0.206787000 |
| 1  | 2.068449000  | 4.914366000  | -0.552867000 |
| 1  | 5.644154000  | 2.664064000  | 0.260030000  |
| 1  | 4.476558000  | 4.853922000  | 0.080763000  |
| 1  | -0.037671000 | -1.985882000 | 0.059331000  |
| 15 | -1.602863000 | -0.075212000 | -0.830449000 |
| 77 | 0.008518000  | -0.557697000 | 0.801472000  |
| 6  | -0.745710000 | -0.296408000 | -2.483969000 |
| 1  | -1.352123000 | 0.115075000  | -3.297695000 |
| 6  | -0.660698000 | 1.216948000  | 2.077136000  |
| 6  | 0.728084000  | 1.123089000  | 2.211042000  |
| 6  | 1.424139000  | 0.575160000  | 3.454834000  |
| 6  | 1.750994000  | -0.927907000 | 3.349879000  |
| 6  | 0.765816000  | -1.686156000 | 2.470347000  |
| 6  | -0.681282000 | -1.586493000 | 2.577085000  |
| 6  | -1.379295000 | -0.704354000 | 3.622595000  |
| 6  | -1.667788000 | 0.719748000  | 3.101798000  |
| 1  | 0.798025000  | 0.768829000  | 4.332114000  |
| 1  | 2.348085000  | 1.142029000  | 3.614295000  |
| 1  | -2.327899000 | -1.170649000 | 3.913201000  |
| 1  | -0.779978000 | -0.663242000 | 4.540345000  |
| 1  | -1.736009000 | 1.436324000  | 3.936540000  |
| 1  | -2.648800000 | 0.724128000  | 2.615676000  |
| 1  | 1.819136000  | -1.374559000 | 4.356121000  |
| 1  | 2.743316000  | -1.039153000 | 2.896263000  |
| 1  | 1.321924000  | 1.808230000  | 1.615250000  |
| 1  | -1.042533000 | 1.989474000  | 1.413417000  |
| 1  | -1.220705000 | -2.510188000 | 2.368194000  |
| 1  | 1.140716000  | -2.674668000 | 2.197644000  |
| 6  | -3.061499000 | -1.186781000 | -1.044865000 |
| 6  | -3.155105000 | -2.353603000 | -0.275068000 |
| 6  | -4.065464000 | -0.907890000 | -1.987383000 |
| 6  | -4.229304000 | -3.230627000 | -0.446821000 |
| 6  | -5.137345000 | -1.783569000 | -2.157493000 |
| 6  | -5.220709000 | -2.947791000 | -1.387362000 |

TS<sub>2-1</sub>

E (BS1) = -2105.183724

E (BS2) = -2105.702271

G<sub>298.15,1M</sub> (BS2) = -2105.156042

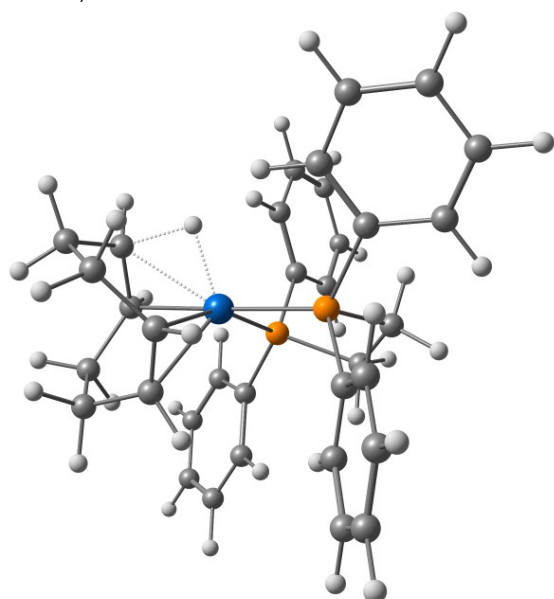

|    |              |              |              |
|----|--------------|--------------|--------------|
| 15 | 1.588564000  | 0.340231000  | -0.703198000 |
| 77 | -0.022145000 | -0.321351000 | 0.774871000  |
| 6  | 0.792015000  | 1.199535000  | -2.176229000 |
| 1  | 1.410318000  | 1.072684000  | -3.070307000 |
| 6  | 1.324371000  | -1.788232000 | 1.720054000  |
| 6  | 0.307874000  | -2.529974000 | 1.046956000  |
| 6  | -0.820545000 | -3.213756000 | 1.827394000  |
| 6  | -2.028607000 | -2.292001000 | 2.067812000  |
| 6  | -1.682736000 | -0.806033000 | 2.090173000  |
| 6  | -0.727650000 | -0.175636000 | 2.985167000  |
| 6  | 0.148610000  | -1.032982000 | 3.908637000  |
| 6  | 1.419590000  | -1.589445000 | 3.230847000  |
| 1  | -0.424286000 | -3.584988000 | 2.781630000  |
| 1  | -1.151118000 | -4.103665000 | 1.279940000  |
| 1  | 0.439509000  | -0.436985000 | 4.780211000  |
| 1  | -0.473861000 | -1.849456000 | 4.293005000  |
| 1  | 1.724462000  | -2.525041000 | 3.726442000  |
| 1  | 2.233459000  | -0.875289000 | 3.401287000  |
| 1  | -2.579767000 | -2.585446000 | 2.977950000  |
| 1  | -2.726193000 | -2.416366000 | 1.232841000  |
| 1  | 0.601213000  | -3.024565000 | 0.123925000  |
| 1  | 2.306321000  | -1.792846000 | 1.247216000  |
| 1  | -1.066121000 | 0.757519000  | 3.434504000  |
| 1  | -2.566701000 | -0.193799000 | 1.901182000  |
| 6  | 2.908158000  | 1.552450000  | -0.244554000 |
| 6  | 3.074626000  | 1.899404000  | 1.101506000  |
| 6  | 3.739179000  | 2.148439000  | -1.208452000 |
| 6  | 4.052983000  | 2.821128000  | 1.482628000  |
| 6  | 4.710940000  | 3.074934000  | -0.829713000 |
| 6  | 4.870417000  | 3.411950000  | 0.517903000  |
| 1  | 2.419499000  | 1.447114000  | 1.841488000  |
| 1  | 3.635520000  | 1.883541000  | -2.257209000 |
| 1  | 4.171512000  | 3.080146000  | 2.531318000  |

|    |              |              |              |
|----|--------------|--------------|--------------|
| 1  | 5.344434000  | 3.533070000  | -1.584396000 |
| 1  | 5.628459000  | 4.132629000  | 0.812074000  |
| 6  | 2.558828000  | -1.040354000 | -1.465950000 |
| 6  | 3.943118000  | -1.198933000 | -1.307560000 |
| 6  | 1.845438000  | -2.027632000 | -2.168223000 |
| 6  | 4.598347000  | -2.308177000 | -1.850720000 |
| 6  | 2.501211000  | -3.126041000 | -2.721879000 |
| 6  | 3.882652000  | -3.270306000 | -2.563526000 |
| 1  | 4.516937000  | -0.458308000 | -0.760448000 |
| 1  | 0.766744000  | -1.944949000 | -2.256071000 |
| 1  | 5.670956000  | -2.416546000 | -1.714398000 |
| 1  | 1.933144000  | -3.875381000 | -3.266600000 |
| 1  | 4.393807000  | -4.130347000 | -2.986894000 |
| 1  | 0.781627000  | 2.265906000  | -1.926022000 |
| 6  | -0.637837000 | 0.700773000  | -2.408875000 |
| 1  | -1.192318000 | 1.388145000  | -3.055807000 |
| 1  | -0.636054000 | -0.280097000 | -2.891725000 |
| 15 | -1.497251000 | 0.511023000  | -0.755400000 |
| 6  | -2.231075000 | 2.205255000  | -0.541181000 |
| 6  | -1.831926000 | 2.975105000  | 0.558206000  |
| 6  | -3.118616000 | 2.766943000  | -1.475276000 |
| 6  | -2.311938000 | 4.276774000  | 0.729556000  |
| 6  | -3.596488000 | 4.066393000  | -1.307704000 |
| 6  | -3.194132000 | 4.824057000  | -0.202910000 |
| 1  | -1.128495000 | 2.543608000  | 1.266493000  |
| 1  | -3.447807000 | 2.182128000  | -2.330212000 |
| 1  | -1.993215000 | 4.862146000  | 1.587877000  |
| 1  | -4.282348000 | 4.488807000  | -2.037183000 |
| 1  | -3.566527000 | 5.836637000  | -0.073884000 |
| 6  | -2.974706000 | -0.533147000 | -1.132306000 |
| 6  | -2.765401000 | -1.786203000 | -1.734302000 |
| 6  | -4.266728000 | -0.211525000 | -0.690759000 |
| 6  | -3.821080000 | -2.675713000 | -1.921047000 |
| 6  | -5.322900000 | -1.112306000 | -0.860538000 |
| 6  | -5.106772000 | -2.341955000 | -1.481815000 |
| 1  | -1.762031000 | -2.080679000 | -2.028537000 |
| 1  | -4.455347000 | 0.743065000  | -0.210636000 |
| 1  | -3.639630000 | -3.635560000 | -2.397197000 |
| 1  | -6.315563000 | -0.846738000 | -0.506892000 |
| 1  | -5.928247000 | -3.040020000 | -1.616141000 |
| 1  | 0.257858000  | 0.678431000  | 2.125161000  |

**[Ir(1- $\kappa$ -4,5- $\eta^2$ -C<sub>8</sub>H<sub>13</sub>)(dppe)] (Intermediate I)**

E (BS1) = -2105.215951

E (BS2) = -2105.736259

G<sub>298.15,1M</sub> (BS2) = -2105.183709

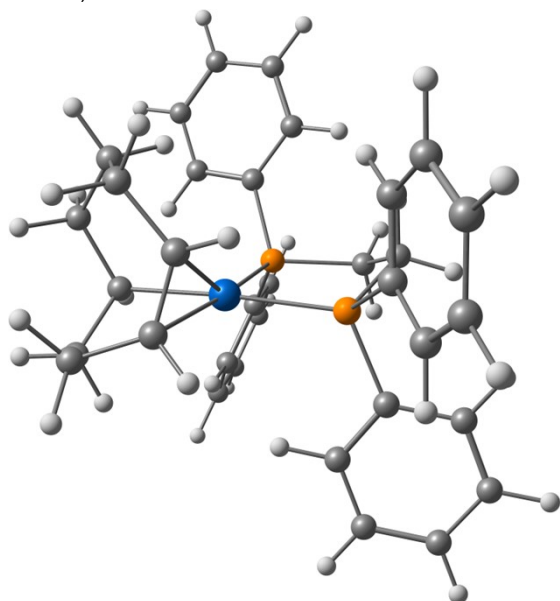

|    |              |              |              |
|----|--------------|--------------|--------------|
| 15 | 1.387292000  | 0.498890000  | -0.831559000 |
| 77 | -0.001595000 | -0.358534000 | 0.761686000  |
| 6  | 0.406386000  | 1.213455000  | -2.266862000 |
| 1  | 0.973893000  | 1.153090000  | -3.201038000 |
| 6  | 1.594278000  | -0.825456000 | 2.135846000  |
| 6  | 2.148579000  | -2.275696000 | 2.058829000  |
| 6  | 1.379831000  | -3.257624000 | 1.159749000  |
| 6  | -0.099067000 | -3.446927000 | 1.537315000  |
| 6  | -1.003465000 | -2.219876000 | 1.434394000  |
| 6  | -1.164895000 | -1.254036000 | 2.449380000  |
| 6  | -0.334219000 | -1.251857000 | 3.726924000  |
| 6  | 0.994180000  | -0.499735000 | 3.518499000  |
| 1  | 1.872273000  | -4.240814000 | 1.196249000  |
| 1  | 1.436917000  | -2.908277000 | 0.122701000  |
| 1  | -0.910021000 | -0.807219000 | 4.546898000  |
| 1  | -0.118032000 | -2.286404000 | 4.027323000  |
| 1  | 1.692636000  | -0.738578000 | 4.340313000  |
| 1  | 0.801888000  | 0.580771000  | 3.582777000  |
| 1  | -0.149213000 | -3.844418000 | 2.562524000  |
| 1  | 2.202376000  | -2.709624000 | 3.072013000  |
| 1  | 2.445085000  | -0.143886000 | 1.993423000  |
| 1  | -2.121395000 | -0.733727000 | 2.496829000  |
| 1  | -1.849567000 | -2.364538000 | 0.767004000  |
| 6  | 2.499722000  | 1.895318000  | -0.384929000 |
| 6  | 2.271866000  | 2.571840000  | 0.822749000  |
| 6  | 3.526306000  | 2.336497000  | -1.234332000 |
| 6  | 3.052109000  | 3.676238000  | 1.172403000  |
| 6  | 4.306635000  | 3.437893000  | -0.882408000 |
| 6  | 4.069407000  | 4.110041000  | 0.320376000  |
| 1  | 1.486247000  | 2.221571000  | 1.486999000  |
| 1  | 3.724236000  | 1.811067000  | -2.164462000 |
| 1  | 2.868860000  | 4.191659000  | 2.111056000  |
| 1  | 5.100772000  | 3.771335000  | -1.544787000 |

|    |              |              |              |
|----|--------------|--------------|--------------|
| 1  | 4.679588000  | 4.966554000  | 0.593201000  |
| 6  | 2.527134000  | -0.733923000 | -1.577798000 |
| 6  | 3.727173000  | -1.047379000 | -0.917889000 |
| 6  | 2.178119000  | -1.456229000 | -2.728634000 |
| 6  | 4.557467000  | -2.058094000 | -1.400009000 |
| 6  | 3.010879000  | -2.469186000 | -3.208927000 |
| 6  | 4.201020000  | -2.774189000 | -2.545766000 |
| 1  | 4.010963000  | -0.498074000 | -0.025767000 |
| 1  | 1.254063000  | -1.238005000 | -3.255101000 |
| 1  | 5.482172000  | -2.287356000 | -0.877843000 |
| 1  | 2.729155000  | -3.019152000 | -4.102634000 |
| 1  | 4.847224000  | -3.563583000 | -2.918817000 |
| 1  | 0.281326000  | 2.275311000  | -2.028099000 |
| 6  | -0.966732000 | 0.540534000  | -2.381485000 |
| 1  | -1.637556000 | 1.121550000  | -3.021884000 |
| 1  | -0.876083000 | -0.459542000 | -2.815717000 |
| 15 | -1.694543000 | 0.312961000  | -0.661363000 |
| 6  | -2.425297000 | 1.984177000  | -0.352327000 |
| 6  | -2.037420000 | 2.675464000  | 0.805135000  |
| 6  | -3.312669000 | 2.605203000  | -1.247096000 |
| 6  | -2.521213000 | 3.960782000  | 1.062606000  |
| 6  | -3.797693000 | 3.887403000  | -0.989822000 |
| 6  | -3.400695000 | 4.568449000  | 0.165169000  |
| 1  | -1.349499000 | 2.193855000  | 1.496406000  |
| 1  | -3.637180000 | 2.080157000  | -2.141596000 |
| 1  | -2.211065000 | 4.485046000  | 1.962272000  |
| 1  | -4.484952000 | 4.355743000  | -1.689083000 |
| 1  | -3.777293000 | 5.568163000  | 0.362997000  |
| 6  | -3.160239000 | -0.758185000 | -0.988156000 |
| 6  | -2.953366000 | -1.997959000 | -1.620524000 |
| 6  | -4.442667000 | -0.459368000 | -0.502920000 |
| 6  | -4.005799000 | -2.896979000 | -1.790241000 |
| 6  | -5.494271000 | -1.364535000 | -0.666536000 |
| 6  | -5.281801000 | -2.581684000 | -1.315414000 |
| 1  | -1.959294000 | -2.272964000 | -1.963248000 |
| 1  | -4.625504000 | 0.483576000  | 0.002420000  |
| 1  | -3.827537000 | -3.847134000 | -2.286320000 |
| 1  | -6.481236000 | -1.114181000 | -0.287018000 |
| 1  | -6.100710000 | -3.283914000 | -1.443125000 |
| 1  | 3.183913000  | -2.252783000 | 1.695350000  |
| 1  | -0.523361000 | -4.222154000 | 0.888004000  |

TS<sub>I-3</sub>

E (BS1) = -2105.181669

E (BS2) = -2105.702657

G<sub>298.15,1M</sub> (BS2) = -2105.154267

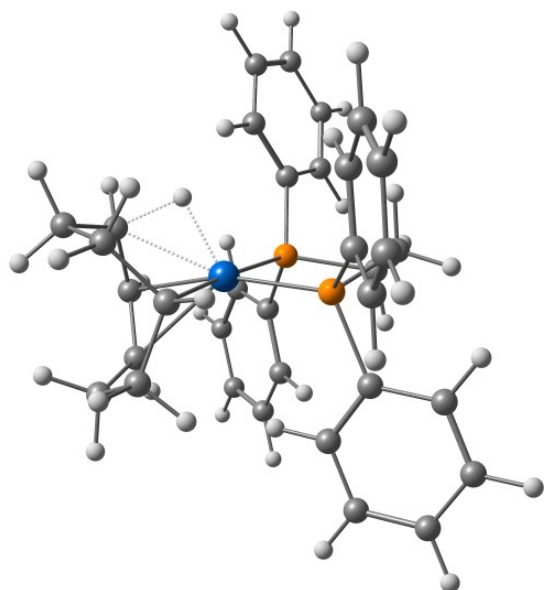

|    |              |              |              |
|----|--------------|--------------|--------------|
| 15 | -1.446523000 | 0.025751000  | -0.899555000 |
| 77 | -0.061495000 | -0.299345000 | 0.819481000  |
| 6  | -0.529265000 | -0.262647000 | -2.506812000 |
| 1  | -1.108547000 | 0.110753000  | -3.356895000 |
| 6  | -2.926530000 | -1.068923000 | -1.042045000 |
| 6  | -2.696459000 | -2.446915000 | -1.190980000 |
| 6  | -4.245123000 | -0.616855000 | -0.895932000 |
| 6  | -3.760834000 | -3.345182000 | -1.231082000 |
| 6  | -5.311794000 | -1.520481000 | -0.921175000 |
| 6  | -5.074152000 | -2.883707000 | -1.095742000 |
| 1  | -1.676241000 | -2.816830000 | -1.247252000 |
| 1  | -4.446543000 | 0.439996000  | -0.756725000 |
| 1  | -3.565976000 | -4.407085000 | -1.354221000 |
| 1  | -6.327788000 | -1.154657000 | -0.800461000 |
| 1  | -5.903373000 | -3.585351000 | -1.116539000 |
| 6  | -2.116985000 | 1.732441000  | -1.219576000 |
| 6  | -1.711013000 | 2.780614000  | -0.383071000 |
| 6  | -2.931185000 | 2.027522000  | -2.326421000 |
| 6  | -2.114610000 | 4.094339000  | -0.637566000 |
| 6  | -3.334252000 | 3.338419000  | -2.582401000 |
| 6  | -2.926231000 | 4.375370000  | -1.737512000 |
| 1  | -1.065655000 | 2.549910000  | 0.460661000  |
| 1  | -3.261083000 | 1.229907000  | -2.986788000 |
| 1  | -1.792380000 | 4.895479000  | 0.022276000  |
| 1  | -3.964342000 | 3.552054000  | -3.441604000 |
| 1  | -3.239600000 | 5.396000000  | -1.939129000 |
| 1  | -0.409768000 | -1.344133000 | -2.625548000 |
| 6  | 0.835034000  | 0.426617000  | -2.410306000 |
| 1  | 1.489533000  | 0.150997000  | -3.242517000 |
| 1  | 0.709998000  | 1.513701000  | -2.430103000 |
| 15 | 1.629619000  | -0.033156000 | -0.773782000 |
| 6  | 2.723653000  | -1.441526000 | -1.266835000 |
| 6  | 2.520742000  | -2.701582000 | -0.689266000 |

|   |              |              |              |
|---|--------------|--------------|--------------|
| 6 | 3.724016000  | -1.297137000 | -2.244472000 |
| 6 | 3.303306000  | -3.794853000 | -1.071968000 |
| 6 | 4.504424000  | -2.387334000 | -2.627398000 |
| 6 | 4.295787000  | -3.639359000 | -2.040010000 |
| 1 | 1.736253000  | -2.820932000 | 0.051784000  |
| 1 | 3.902625000  | -0.325793000 | -2.697853000 |
| 1 | 3.134065000  | -4.765553000 | -0.613999000 |
| 1 | 5.275300000  | -2.261828000 | -3.382748000 |
| 1 | 4.904598000  | -4.488118000 | -2.338913000 |
| 6 | 2.810796000  | 1.348171000  | -0.451481000 |
| 6 | 2.299537000  | 2.658343000  | -0.421044000 |
| 6 | 4.145947000  | 1.139881000  | -0.074068000 |
| 6 | 3.111425000  | 3.731393000  | -0.057712000 |
| 6 | 4.955329000  | 2.216137000  | 0.301880000  |
| 6 | 4.444091000  | 3.513889000  | 0.305600000  |
| 1 | 1.255919000  | 2.839390000  | -0.662237000 |
| 1 | 4.562098000  | 0.137590000  | -0.075521000 |
| 1 | 2.700976000  | 4.737442000  | -0.049735000 |
| 1 | 5.987237000  | 2.035447000  | 0.590276000  |
| 1 | 5.074722000  | 4.349753000  | 0.594792000  |
| 1 | 0.302507000  | -1.880461000 | 1.315488000  |
| 6 | -1.752754000 | -0.482761000 | 2.163079000  |
| 6 | -1.933217000 | 0.831723000  | 2.937518000  |
| 6 | -0.627869000 | 1.316050000  | 3.587349000  |
| 6 | 0.600205000  | 1.146274000  | 2.694825000  |
| 6 | 1.368792000  | -0.016941000 | 2.525234000  |
| 6 | 0.927065000  | -1.413408000 | 2.612608000  |
| 6 | -0.134937000 | -1.862844000 | 3.629061000  |
| 6 | -1.560979000 | -1.719191000 | 3.066624000  |
| 1 | -0.467377000 | 0.786680000  | 4.533384000  |
| 1 | -0.715809000 | 2.375858000  | 3.854512000  |
| 1 | 0.058445000  | -2.907785000 | 3.897729000  |
| 1 | -0.013658000 | -1.283173000 | 4.549620000  |
| 1 | -2.291081000 | -1.724861000 | 3.893689000  |
| 1 | -1.770184000 | -2.608033000 | 2.458232000  |
| 1 | 1.141666000  | 2.062625000  | 2.466342000  |
| 1 | -2.723805000 | 0.741139000  | 3.704826000  |
| 1 | -2.684402000 | -0.656373000 | 1.611054000  |
| 1 | 1.770818000  | -2.096868000 | 2.517049000  |
| 1 | 2.388024000  | 0.129029000  | 2.170606000  |
| 1 | -2.270263000 | 1.601480000  | 2.233099000  |

**[IrH(1- $\kappa$ -4,5,6- $\eta^3$ -C<sub>8</sub>H<sub>12</sub>)(dppe)] (Compound 3)**

E (BS1) = -2105.224667

E (BS2) = -2105.743037

G<sub>298.15,1M</sub> (BS2) = -2105.743037

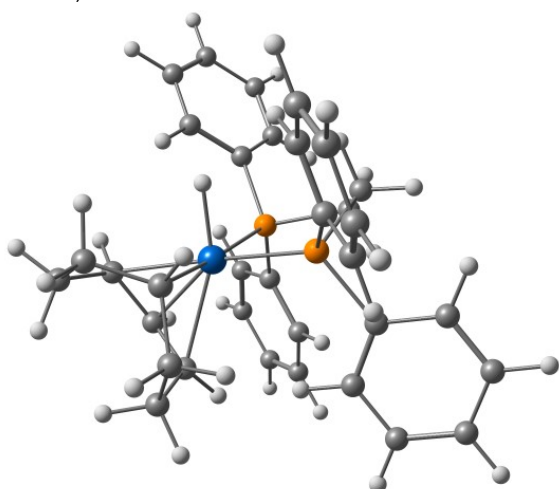

|    |              |              |              |
|----|--------------|--------------|--------------|
| 15 | -1.449615000 | 0.116751000  | -0.908710000 |
| 77 | -0.027936000 | -0.562780000 | 0.768259000  |
| 6  | -0.498885000 | -0.023772000 | -2.512351000 |
| 1  | -1.060287000 | 0.411244000  | -3.344278000 |
| 6  | -2.940770000 | -0.923685000 | -1.189194000 |
| 6  | -2.756103000 | -2.275369000 | -1.525859000 |
| 6  | -4.243342000 | -0.449932000 | -0.978043000 |
| 6  | -3.851167000 | -3.124865000 | -1.673144000 |
| 6  | -5.338759000 | -1.306310000 | -1.115726000 |
| 6  | -5.147003000 | -2.642348000 | -1.468303000 |
| 1  | -1.752043000 | -2.670825000 | -1.645357000 |
| 1  | -4.408853000 | 0.586152000  | -0.702332000 |
| 1  | -3.692228000 | -4.166628000 | -1.937299000 |
| 1  | -6.341821000 | -0.925411000 | -0.945067000 |
| 1  | -5.999745000 | -3.306678000 | -1.575932000 |
| 6  | -2.088672000 | 1.848442000  | -1.006977000 |
| 6  | -1.836823000 | 2.738721000  | 0.044043000  |
| 6  | -2.791039000 | 2.309998000  | -2.134116000 |
| 6  | -2.268057000 | 4.066193000  | -0.027952000 |
| 6  | -3.221979000 | 3.634294000  | -2.206208000 |
| 6  | -2.959107000 | 4.516253000  | -1.153274000 |
| 1  | -1.295485000 | 2.379396000  | 0.911324000  |
| 1  | -3.017449000 | 1.631626000  | -2.951936000 |
| 1  | -2.063535000 | 4.744440000  | 0.795803000  |
| 1  | -3.764510000 | 3.978143000  | -3.082485000 |
| 1  | -3.294096000 | 5.548021000  | -1.212156000 |
| 1  | -0.373955000 | -1.092490000 | -2.711470000 |
| 6  | 0.863705000  | 0.656298000  | -2.342336000 |
| 1  | 1.516798000  | 0.455791000  | -3.196342000 |
| 1  | 0.736946000  | 1.741228000  | -2.271802000 |
| 15 | 1.675174000  | 0.075005000  | -0.748437000 |
| 6  | 2.887409000  | -1.183997000 | -1.334764000 |
| 6  | 2.870484000  | -2.464821000 | -0.766080000 |
| 6  | 3.821709000  | -0.898794000 | -2.345997000 |
| 6  | 3.768783000  | -3.443620000 | -1.200588000 |
| 6  | 4.715928000  | -1.876584000 | -2.779904000 |

|   |              |              |              |
|---|--------------|--------------|--------------|
| 6 | 4.690381000  | -3.152158000 | -2.206784000 |
| 1 | 2.142627000  | -2.687188000 | 0.007685000  |
| 1 | 3.861169000  | 0.094408000  | -2.785376000 |
| 1 | 3.744601000  | -4.432940000 | -0.752224000 |
| 1 | 5.433144000  | -1.644445000 | -3.562383000 |
| 1 | 5.387124000  | -3.913717000 | -2.545899000 |
| 6 | 2.720864000  | 1.515868000  | -0.267505000 |
| 6 | 2.071738000  | 2.744947000  | -0.048745000 |
| 6 | 4.085686000  | 1.411805000  | 0.037994000  |
| 6 | 2.777617000  | 3.847058000  | 0.429756000  |
| 6 | 4.789473000  | 2.516346000  | 0.527007000  |
| 6 | 4.141031000  | 3.736413000  | 0.719465000  |
| 1 | 1.005679000  | 2.835732000  | -0.237573000 |
| 1 | 4.605789000  | 0.470211000  | -0.105106000 |
| 1 | 2.261052000  | 4.790382000  | 0.584815000  |
| 1 | 5.846800000  | 2.418743000  | 0.757492000  |
| 1 | 4.690030000  | 4.593614000  | 1.098664000  |
| 1 | -0.098479000 | -2.004729000 | 0.046126000  |
| 6 | -1.653023000 | -1.281376000 | 1.977390000  |
| 6 | -2.273298000 | -0.098304000 | 2.736204000  |
| 6 | -1.215108000 | 0.801761000  | 3.399652000  |
| 6 | 0.030948000  | 1.010654000  | 2.534384000  |
| 6 | 1.158249000  | 0.158276000  | 2.485651000  |
| 6 | 1.119449000  | -1.275293000 | 2.550353000  |
| 6 | 0.221968000  | -2.067729000 | 3.512025000  |
| 6 | -1.129971000 | -2.417165000 | 2.872607000  |
| 1 | -0.923236000 | 0.381229000  | 4.368305000  |
| 1 | -1.651025000 | 1.783050000  | 3.622833000  |
| 1 | 0.747100000  | -2.982221000 | 3.813038000  |
| 1 | 0.071452000  | -1.494962000 | 4.434077000  |
| 1 | -1.865195000 | -2.695727000 | 3.648198000  |
| 1 | -0.986972000 | -3.300778000 | 2.238021000  |
| 1 | 0.267359000  | 2.049994000  | 2.309893000  |
| 1 | -3.005118000 | -0.439069000 | 3.489995000  |
| 1 | -2.437528000 | -1.707595000 | 1.340894000  |
| 1 | 2.083829000  | -1.742305000 | 2.353461000  |
| 1 | 2.095831000  | 0.615559000  | 2.174152000  |
| 1 | -2.831943000 | 0.513239000  | 2.015418000  |



**[Ir(1- $\kappa$ -3,4- $\eta^2$ -C<sub>8</sub>H<sub>11</sub>)(dppe)] (Intermediate II)**

E (BS1) = -2103.986413

E (BS2) = -2104.51041

G<sub>298.15,1M</sub> (BS2) = -2103.985559

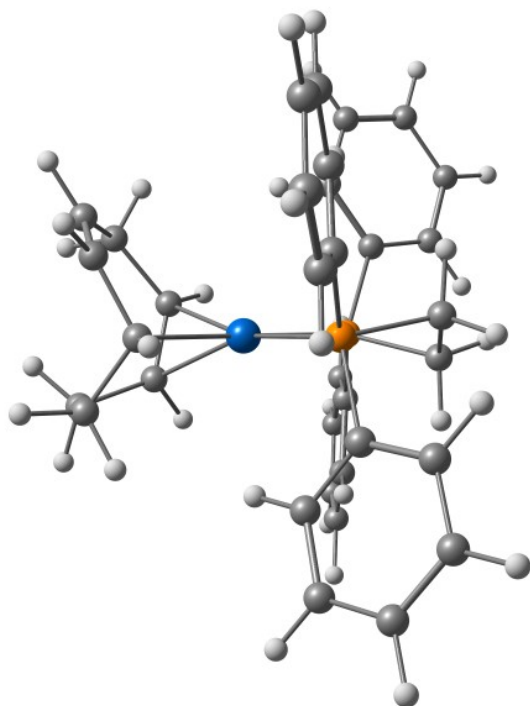

|    |              |              |              |
|----|--------------|--------------|--------------|
| 15 | -1.523840000 | 0.123962000  | -0.895008000 |
| 77 | -0.019361000 | 0.002202000  | 0.832229000  |
| 6  | -0.615091000 | -0.104210000 | -2.519257000 |
| 1  | -1.216250000 | 0.262978000  | -3.356389000 |
| 6  | -1.533444000 | -0.089419000 | 2.351128000  |
| 6  | -1.250931000 | 1.045514000  | 3.364125000  |
| 6  | 0.223290000  | 1.020985000  | 3.795460000  |
| 6  | 1.138087000  | 0.660959000  | 2.628482000  |
| 6  | 1.488265000  | -0.664851000 | 2.330736000  |
| 6  | 1.060022000  | -1.880254000 | 3.142720000  |
| 6  | -0.408578000 | -2.178583000 | 3.340721000  |
| 6  | -1.484662000 | -1.455365000 | 2.978901000  |
| 1  | 0.352056000  | 0.275389000  | 4.590373000  |
| 1  | 0.524049000  | 1.986937000  | 4.217466000  |
| 1  | -0.587772000 | -3.137443000 | 3.829942000  |
| 1  | -2.452093000 | -1.922674000 | 3.186167000  |
| 1  | 1.801662000  | 1.448227000  | 2.273017000  |
| 1  | -1.904828000 | 0.987088000  | 4.250538000  |
| 1  | -2.554631000 | 0.057561000  | 1.974620000  |
| 1  | 1.544797000  | -1.813688000 | 4.133157000  |
| 1  | 2.436159000  | -0.821473000 | 1.817578000  |
| 6  | -2.846323000 | -1.152726000 | -0.937732000 |
| 6  | -2.434978000 | -2.497249000 | -0.955331000 |
| 6  | -4.213817000 | -0.861772000 | -0.842115000 |
| 6  | -3.373630000 | -3.525685000 | -0.907325000 |
| 6  | -5.152453000 | -1.895827000 | -0.784158000 |
| 6  | -4.737086000 | -3.226882000 | -0.821790000 |
| 1  | -1.375247000 | -2.737717000 | -0.982680000 |
| 1  | -4.551700000 | 0.168501000  | -0.807094000 |
| 1  | -3.041548000 | -4.559989000 | -0.924257000 |

|    |              |              |              |
|----|--------------|--------------|--------------|
| 1  | -6.209527000 | -1.656172000 | -0.708072000 |
| 1  | -5.469243000 | -4.028229000 | -0.776846000 |
| 6  | -2.369661000 | 1.739681000  | -1.133695000 |
| 6  | -3.186937000 | 1.992009000  | -2.248402000 |
| 6  | -2.154807000 | 2.762594000  | -0.198571000 |
| 6  | -2.751581000 | 4.013753000  | -0.370488000 |
| 6  | -3.781325000 | 3.242364000  | -2.418738000 |
| 6  | -3.564998000 | 4.254828000  | -1.478980000 |
| 1  | -3.369656000 | 1.208608000  | -2.978827000 |
| 1  | -1.507957000 | 2.564124000  | 0.651387000  |
| 1  | -2.578874000 | 4.797917000  | 0.361279000  |
| 1  | -4.412371000 | 3.427343000  | -3.283525000 |
| 1  | -4.029201000 | 5.227910000  | -1.613023000 |
| 1  | -0.469813000 | -1.180640000 | -2.661214000 |
| 6  | 0.737646000  | 0.613707000  | -2.430214000 |
| 1  | 1.367705000  | 0.388721000  | -3.296113000 |
| 1  | 0.591614000  | 1.698634000  | -2.393116000 |
| 15 | 1.573033000  | 0.106435000  | -0.826340000 |
| 6  | 2.408706000  | -1.462707000 | -1.342872000 |
| 6  | 2.083554000  | -2.640485000 | -0.652871000 |
| 6  | 3.297852000  | -1.536469000 | -2.428490000 |
| 6  | 2.636295000  | -3.865351000 | -1.036234000 |
| 6  | 3.850365000  | -2.758980000 | -2.811037000 |
| 6  | 3.520878000  | -3.925796000 | -2.114162000 |
| 1  | 1.383806000  | -2.584009000 | 0.176999000  |
| 1  | 3.566884000  | -0.634391000 | -2.971818000 |
| 1  | 2.375136000  | -4.769339000 | -0.492800000 |
| 1  | 4.537739000  | -2.802662000 | -3.651511000 |
| 1  | 3.951238000  | -4.877336000 | -2.413965000 |
| 6  | 2.943183000  | 1.325036000  | -0.640065000 |
| 6  | 2.583919000  | 2.678904000  | -0.504984000 |
| 6  | 4.291357000  | 0.968507000  | -0.489435000 |
| 6  | 3.552400000  | 3.651745000  | -0.264393000 |
| 6  | 5.259744000  | 1.944476000  | -0.236370000 |
| 6  | 4.895774000  | 3.286963000  | -0.130013000 |
| 1  | 1.537833000  | 2.966352000  | -0.571168000 |
| 1  | 4.592735000  | -0.070660000 | -0.571379000 |
| 1  | 3.258415000  | 4.693730000  | -0.171371000 |
| 1  | 6.299925000  | 1.651022000  | -0.123263000 |
| 1  | 5.650244000  | 4.044258000  | 0.063501000  |
| 1  | 1.512702000  | -2.766208000 | 2.674995000  |
| 1  | -1.467314000 | 2.005300000  | 2.878720000  |

**TS<sub>II-4</sub>**

E (BS1) = -2103.984687

E (BS2) = -2104.509184

G<sub>298.15,1M</sub> (BS2) = -2103.980745

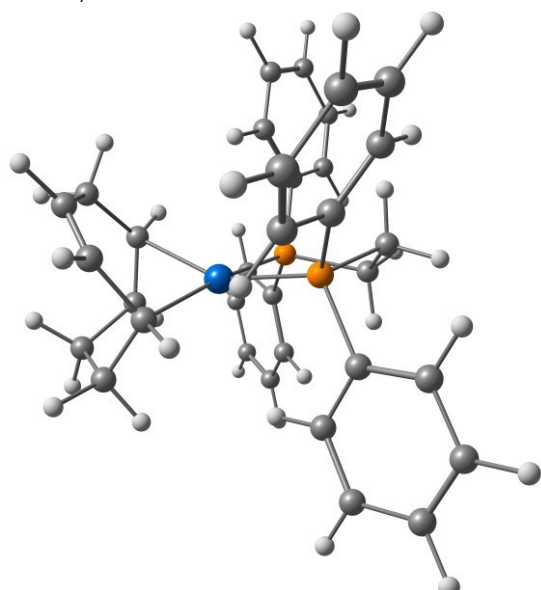

|    |              |              |              |
|----|--------------|--------------|--------------|
| 15 | 1.507369000  | 0.098884000  | -0.871091000 |
| 77 | -0.032005000 | -0.273181000 | 0.803392000  |
| 6  | 0.622178000  | 0.690191000  | -2.414450000 |
| 1  | 1.234341000  | 0.513938000  | -3.304477000 |
| 6  | 1.378180000  | -0.917099000 | 2.292261000  |
| 6  | 0.773410000  | -2.191031000 | 2.934576000  |
| 6  | -0.665543000 | -1.916677000 | 3.396922000  |
| 6  | -1.406979000 | -1.055237000 | 2.380665000  |
| 6  | -1.395051000 | 0.351365000  | 2.417862000  |
| 6  | -0.733960000 | 1.201586000  | 3.493227000  |
| 6  | 0.724763000  | 1.013411000  | 3.839349000  |
| 6  | 1.619824000  | 0.161675000  | 3.310499000  |
| 1  | -0.640276000 | -1.396172000 | 4.362777000  |
| 1  | -1.210099000 | -2.854325000 | 3.557376000  |
| 1  | 1.073383000  | 1.704165000  | 4.608705000  |
| 1  | 2.639393000  | 0.247420000  | 3.699561000  |
| 1  | -2.238302000 | -1.532668000 | 1.863395000  |
| 1  | 1.380376000  | -2.560916000 | 3.778495000  |
| 1  | 2.352040000  | -1.209614000 | 1.877799000  |
| 1  | -1.329210000 | 1.082913000  | 4.416114000  |
| 1  | -2.248028000 | 0.859972000  | 1.968897000  |
| 6  | 2.871554000  | 1.302747000  | -0.603237000 |
| 6  | 2.995433000  | 2.503681000  | -1.316773000 |
| 6  | 3.813332000  | 1.010964000  | 0.399494000  |
| 6  | 4.034395000  | 3.394059000  | -1.030717000 |
| 6  | 4.850230000  | 1.897909000  | 0.679110000  |
| 6  | 4.962738000  | 3.095256000  | -0.033767000 |
| 1  | 2.290950000  | 2.758538000  | -2.100849000 |
| 1  | 3.731263000  | 0.087239000  | 0.961675000  |
| 1  | 4.115824000  | 4.320537000  | -1.592444000 |
| 1  | 5.568186000  | 1.656478000  | 1.457850000  |
| 1  | 5.768844000  | 3.788942000  | 0.187692000  |
| 6  | 2.384607000  | -1.405081000 | -1.477941000 |
| 6  | 3.455152000  | -1.323270000 | -2.381942000 |

|    |              |              |              |
|----|--------------|--------------|--------------|
| 6  | 1.936769000  | -2.666386000 | -1.056999000 |
| 6  | 2.542405000  | -3.828222000 | -1.542082000 |
| 6  | 4.060188000  | -2.484416000 | -2.862457000 |
| 6  | 3.603880000  | -3.738366000 | -2.444163000 |
| 1  | 3.820990000  | -0.351816000 | -2.703977000 |
| 1  | 1.116960000  | -2.723278000 | -0.344462000 |
| 1  | 2.189835000  | -4.800028000 | -1.207966000 |
| 1  | 4.889495000  | -2.412112000 | -3.560711000 |
| 1  | 4.078487000  | -4.641114000 | -2.818554000 |
| 1  | 0.462023000  | 1.768937000  | -2.317933000 |
| 6  | -0.738077000 | -0.014297000 | -2.502335000 |
| 1  | -1.352604000 | 0.404582000  | -3.305194000 |
| 1  | -0.605134000 | -1.083106000 | -2.698627000 |
| 15 | -1.581885000 | 0.170358000  | -0.836434000 |
| 6  | -2.305237000 | 1.865314000  | -1.006424000 |
| 6  | -1.799572000 | 2.878966000  | -0.178330000 |
| 6  | -3.274777000 | 2.193451000  | -1.969117000 |
| 6  | -2.255757000 | 4.193856000  | -0.307104000 |
| 6  | -3.731448000 | 3.505277000  | -2.095578000 |
| 6  | -3.222699000 | 4.507717000  | -1.263364000 |
| 1  | -1.040044000 | 2.624771000  | 0.557020000  |
| 1  | -3.680710000 | 1.419045000  | -2.614599000 |
| 1  | -1.855586000 | 4.969546000  | 0.339961000  |
| 1  | -4.482973000 | 3.747091000  | -2.842318000 |
| 1  | -3.579377000 | 5.529187000  | -1.363158000 |
| 6  | -3.034486000 | -0.958081000 | -0.921315000 |
| 6  | -2.821121000 | -2.304409000 | -1.267285000 |
| 6  | -4.311118000 | -0.571240000 | -0.484343000 |
| 6  | -3.862411000 | -3.229265000 | -1.204462000 |
| 6  | -5.351004000 | -1.501743000 | -0.412259000 |
| 6  | -5.132146000 | -2.830843000 | -0.776390000 |
| 1  | -1.833012000 | -2.637032000 | -1.571728000 |
| 1  | -4.499016000 | 0.459418000  | -0.200553000 |
| 1  | -3.680949000 | -4.263861000 | -1.482742000 |
| 1  | -6.332618000 | -1.183798000 | -0.071750000 |
| 1  | -5.941345000 | -3.553603000 | -0.722237000 |
| 1  | -0.869442000 | 2.255920000  | 3.210873000  |
| 1  | 0.762575000  | -2.989464000 | 2.181007000  |

**[IrH(1- $\kappa$ -3,4- $\eta^2$ -C<sub>8</sub>H<sub>10</sub>)(dppe)] (4)**

E (BS1) = -2103.99503

E (BS2) = -2104.5165

G<sub>298.15,1M</sub> (BS2) = -2103.988472

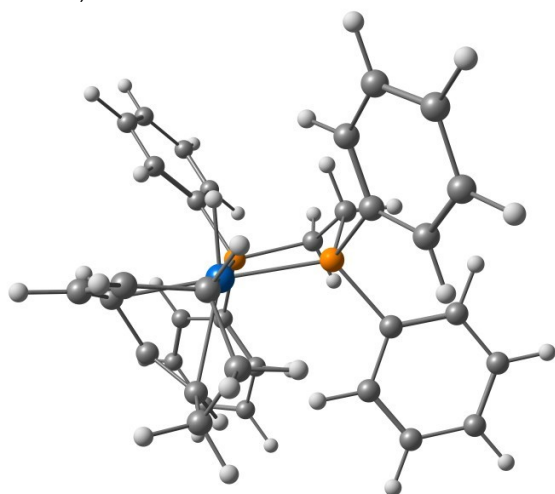

|    |              |              |              |
|----|--------------|--------------|--------------|
| 15 | -1.443778000 | 0.058659000  | -0.903479000 |
| 77 | -0.021535000 | -0.552002000 | 0.798597000  |
| 6  | -0.486828000 | -0.133541000 | -2.497107000 |
| 1  | -1.047290000 | 0.268981000  | -3.345910000 |
| 6  | -1.645822000 | -1.234155000 | 2.046026000  |
| 6  | -2.352851000 | 0.005558000  | 2.635270000  |
| 6  | -1.311442000 | 0.904469000  | 3.328374000  |
| 6  | -0.023032000 | 1.072940000  | 2.518032000  |
| 6  | 1.114963000  | 0.231182000  | 2.523791000  |
| 6  | 1.121124000  | -1.211287000 | 2.585734000  |
| 6  | 0.210054000  | -2.023712000 | 3.447567000  |
| 6  | -1.097842000 | -2.060891000 | 3.181818000  |
| 1  | -1.067915000 | 0.481322000  | 4.309020000  |
| 1  | -1.737862000 | 1.896758000  | 3.517382000  |
| 1  | 0.644866000  | -2.551858000 | 4.297388000  |
| 1  | -1.790762000 | -2.581781000 | 3.848954000  |
| 1  | 0.224730000  | 2.104257000  | 2.268718000  |
| 1  | -3.147233000 | -0.270005000 | 3.350700000  |
| 1  | -2.369438000 | -1.821511000 | 1.466658000  |
| 1  | 2.113353000  | -1.641841000 | 2.445227000  |
| 1  | 2.052548000  | 0.701454000  | 2.229375000  |
| 6  | -2.929339000 | -1.000457000 | -1.129475000 |
| 6  | -2.740889000 | -2.362280000 | -1.419635000 |
| 6  | -4.231327000 | -0.527715000 | -0.911552000 |
| 6  | -3.832584000 | -3.223228000 | -1.517518000 |
| 6  | -5.323044000 | -1.395186000 | -0.999355000 |
| 6  | -5.127900000 | -2.741770000 | -1.307312000 |
| 1  | -1.736422000 | -2.755330000 | -1.542906000 |
| 1  | -4.399369000 | 0.516629000  | -0.671051000 |
| 1  | -3.670958000 | -4.272704000 | -1.746950000 |
| 1  | -6.325592000 | -1.014754000 | -0.824789000 |
| 1  | -5.977602000 | -3.415077000 | -1.376247000 |
| 6  | -2.093397000 | 1.780944000  | -1.069051000 |
| 6  | -2.814557000 | 2.185751000  | -2.206061000 |
| 6  | -1.831852000 | 2.720242000  | -0.064201000 |
| 6  | -2.272384000 | 4.040495000  | -0.191220000 |

|    |              |              |              |
|----|--------------|--------------|--------------|
| 6  | -3.254908000 | 3.502766000  | -2.333014000 |
| 6  | -2.983136000 | 4.433812000  | -1.325546000 |
| 1  | -3.047396000 | 1.468826000  | -2.988447000 |
| 1  | -1.276462000 | 2.404988000  | 0.811165000  |
| 1  | -2.060621000 | 4.757212000  | 0.597334000  |
| 1  | -3.812267000 | 3.802170000  | -3.216208000 |
| 1  | -3.325891000 | 5.459764000  | -1.426614000 |
| 1  | -0.352430000 | -1.207486000 | -2.658465000 |
| 6  | 0.869954000  | 0.563818000  | -2.343198000 |
| 1  | 1.528998000  | 0.339315000  | -3.186622000 |
| 1  | 0.733783000  | 1.649543000  | -2.310262000 |
| 15 | 1.677589000  | 0.042853000  | -0.726022000 |
| 6  | 2.897885000  | -1.229458000 | -1.263765000 |
| 6  | 2.881782000  | -2.494298000 | -0.660280000 |
| 6  | 3.836819000  | -0.968349000 | -2.277243000 |
| 6  | 3.785099000  | -3.481488000 | -1.064394000 |
| 6  | 4.736124000  | -1.954522000 | -2.680305000 |
| 6  | 4.710849000  | -3.214455000 | -2.073553000 |
| 1  | 2.151731000  | -2.698383000 | 0.116329000  |
| 1  | 3.875189000  | 0.012807000  | -2.743084000 |
| 1  | 3.761144000  | -4.458499000 | -0.589897000 |
| 1  | 5.456818000  | -1.741405000 | -3.464976000 |
| 1  | 5.410950000  | -3.983105000 | -2.388929000 |
| 6  | 2.714150000  | 1.501366000  | -0.281579000 |
| 6  | 2.061338000  | 2.735758000  | -0.109407000 |
| 6  | 4.076029000  | 1.409163000  | 0.040577000  |
| 6  | 2.761511000  | 3.854082000  | 0.339092000  |
| 6  | 4.773784000  | 2.530071000  | 0.499889000  |
| 6  | 4.122170000  | 3.754921000  | 0.645424000  |
| 1  | 0.997163000  | 2.818686000  | -0.311359000 |
| 1  | 4.598627000  | 0.464218000  | -0.066434000 |
| 1  | 2.242672000  | 4.801360000  | 0.458202000  |
| 1  | 5.828866000  | 2.441466000  | 0.743873000  |
| 1  | 4.666627000  | 4.624902000  | 1.001343000  |
| 1  | -0.076746000 | -2.011734000 | 0.118105000  |
| 1  | -2.837796000 | 0.568979000  | 1.829017000  |

TS<sub>II-III</sub>

E (BS1) = -2103.93930388

E (BS2) = -2104.46483112

G<sub>298.15,1M</sub> (BS2) = -2103.943577

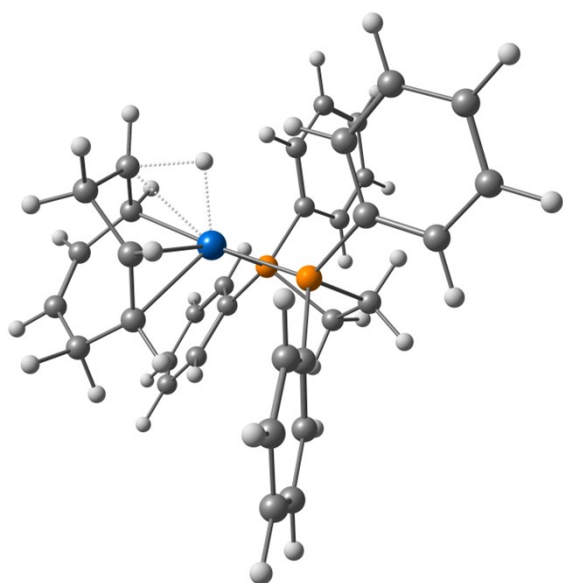

|    |              |              |              |
|----|--------------|--------------|--------------|
| 15 | 1.627715000  | 0.330029000  | -0.616233000 |
| 77 | -0.014270000 | -0.340372000 | 0.810359000  |
| 6  | 0.869472000  | 1.189948000  | -2.106902000 |
| 1  | 1.494763000  | 1.034159000  | -2.991813000 |
| 6  | 1.129057000  | -1.852590000 | 1.965146000  |
| 6  | 0.504694000  | -2.557764000 | 0.899764000  |
| 6  | -0.570393000 | -3.616801000 | 1.027642000  |
| 6  | -1.858259000 | -3.329794000 | 1.744569000  |
| 6  | -2.313966000 | -2.154471000 | 2.197748000  |
| 6  | -1.663996000 | -0.825254000 | 2.206353000  |
| 6  | -0.524106000 | -0.489840000 | 3.052714000  |
| 6  | 0.485497000  | -1.601673000 | 3.333156000  |
| 1  | -0.646586000 | 0.287947000  | 3.805708000  |
| 1  | -0.001823000 | -2.484665000 | 3.769050000  |
| 1  | 1.244398000  | -1.253421000 | 4.039274000  |
| 1  | 0.268497000  | 0.589898000  | 2.214933000  |
| 1  | -2.510534000 | -4.196775000 | 1.850869000  |
| 1  | 2.202054000  | -1.686042000 | 1.911656000  |
| 1  | -2.410365000 | -0.028651000 | 2.187042000  |
| 1  | -3.324156000 | -2.152206000 | 2.612154000  |
| 6  | 2.923530000  | 1.555795000  | -0.119767000 |
| 6  | 3.940468000  | 1.939826000  | -1.010044000 |
| 6  | 2.876193000  | 2.139611000  | 1.151002000  |
| 6  | 4.886169000  | 2.893015000  | -0.633979000 |
| 6  | 3.825905000  | 3.092452000  | 1.529851000  |
| 6  | 4.830453000  | 3.471182000  | 0.638388000  |
| 1  | 3.999605000  | 1.485082000  | -1.995403000 |
| 1  | 2.086608000  | 1.839075000  | 1.835016000  |
| 1  | 5.668232000  | 3.183645000  | -1.330247000 |
| 1  | 3.779900000  | 3.536675000  | 2.520533000  |
| 1  | 5.569556000  | 4.211529000  | 0.932030000  |
| 6  | 2.657807000  | -1.025456000 | -1.324189000 |
| 6  | 2.220310000  | -1.745961000 | -2.446561000 |

|    |              |              |              |
|----|--------------|--------------|--------------|
| 6  | 3.817544000  | -1.453055000 | -0.658541000 |
| 6  | 2.931816000  | -2.857961000 | -2.899812000 |
| 6  | 4.525489000  | -2.569036000 | -1.108517000 |
| 6  | 4.085496000  | -3.274072000 | -2.230733000 |
| 1  | 1.317203000  | -1.445693000 | -2.968751000 |
| 1  | 4.175361000  | -0.905685000 | 0.208566000  |
| 1  | 2.584008000  | -3.400331000 | -3.774763000 |
| 1  | 5.421600000  | -2.885377000 | -0.581934000 |
| 1  | 4.637303000  | -4.141459000 | -2.581594000 |
| 1  | 0.891329000  | 2.259901000  | -1.873957000 |
| 6  | -0.574726000 | 0.734239000  | -2.336925000 |
| 1  | -1.099091000 | 1.417674000  | -3.012138000 |
| 1  | -0.612126000 | -0.266162000 | -2.778281000 |
| 15 | -1.448198000 | 0.598296000  | -0.684220000 |
| 6  | -2.058691000 | 2.336154000  | -0.441201000 |
| 6  | -1.762230000 | 2.985337000  | 0.764464000  |
| 6  | -2.756843000 | 3.044957000  | -1.434335000 |
| 6  | -2.160481000 | 4.306853000  | 0.981757000  |
| 6  | -3.150051000 | 4.366700000  | -1.222157000 |
| 6  | -2.853411000 | 5.000302000  | -0.011724000 |
| 1  | -1.197057000 | 2.446619000  | 1.520957000  |
| 1  | -3.007667000 | 2.560605000  | -2.374102000 |
| 1  | -1.922749000 | 4.795355000  | 1.922869000  |
| 1  | -3.687258000 | 4.902260000  | -2.000246000 |
| 1  | -3.158297000 | 6.030194000  | 0.152281000  |
| 6  | -2.973436000 | -0.358853000 | -1.101423000 |
| 6  | -2.787862000 | -1.714469000 | -1.423540000 |
| 6  | -4.279775000 | 0.144558000  | -1.034012000 |
| 6  | -3.876478000 | -2.532360000 | -1.717743000 |
| 6  | -5.373126000 | -0.682679000 | -1.308998000 |
| 6  | -5.175628000 | -2.018062000 | -1.660559000 |
| 1  | -1.782365000 | -2.126382000 | -1.406938000 |
| 1  | -4.454507000 | 1.179988000  | -0.762228000 |
| 1  | -3.713671000 | -3.576762000 | -1.970021000 |
| 1  | -6.379866000 | -0.277999000 | -1.247913000 |
| 1  | -6.026903000 | -2.657919000 | -1.875933000 |
| 1  | -0.837097000 | -3.957710000 | 0.015219000  |
| 1  | 1.173594000  | -2.775120000 | 0.069990000  |
| 1  | -0.114557000 | -4.503106000 | 1.501934000  |

**[IrH( $\eta^2$ : $\eta^2$ -1,3,6-COT)(dppe)] (III)**

E (BS1) = -2103.97847922

E (BS2) = -2104.50157745

G<sub>298.15,1M</sub> (BS2) = -2103.974424

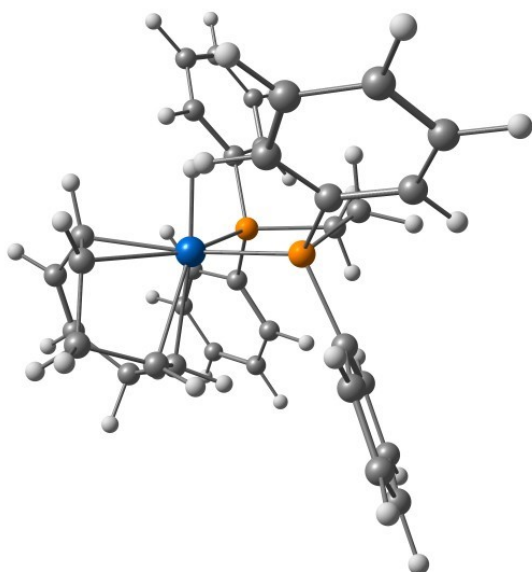

|    |              |              |              |
|----|--------------|--------------|--------------|
| 15 | 1.763714000  | 0.261630000  | -0.629685000 |
| 77 | 0.085952000  | 0.156068000  | 0.943069000  |
| 6  | 1.023999000  | 0.992813000  | -2.200866000 |
| 1  | 1.657041000  | 0.776628000  | -3.067249000 |
| 6  | 0.795320000  | -1.838122000 | 1.825385000  |
| 6  | -0.350299000 | -2.162192000 | 1.098245000  |
| 6  | -1.685595000 | -2.603652000 | 1.669397000  |
| 6  | -2.423753000 | -1.770682000 | 2.683936000  |
| 6  | -2.166895000 | -0.528178000 | 3.118578000  |
| 6  | -1.030410000 | 0.370680000  | 2.806147000  |
| 6  | 0.357741000  | 0.068018000  | 3.111642000  |
| 6  | 0.781014000  | -1.382869000 | 3.278498000  |
| 1  | 0.972277000  | 0.831892000  | 3.582184000  |
| 1  | 0.100231000  | -1.971942000 | 3.908242000  |
| 1  | 1.785736000  | -1.452337000 | 3.703837000  |
| 1  | 0.236481000  | 1.754610000  | 0.983911000  |
| 1  | -3.318458000 | -2.260105000 | 3.069794000  |
| 1  | 1.767067000  | -2.046910000 | 1.388857000  |
| 1  | -1.290726000 | 1.415540000  | 2.978689000  |
| 1  | -2.895944000 | -0.102660000 | 3.812462000  |
| 6  | 3.223232000  | 1.362249000  | -0.388845000 |
| 6  | 4.181417000  | 1.545101000  | -1.400355000 |
| 6  | 3.373932000  | 2.043819000  | 0.825463000  |
| 6  | 5.264744000  | 2.399915000  | -1.200402000 |
| 6  | 4.460640000  | 2.899707000  | 1.025158000  |
| 6  | 5.405674000  | 3.079054000  | 0.014014000  |
| 1  | 4.087792000  | 1.010677000  | -2.341837000 |
| 1  | 2.629549000  | 1.896438000  | 1.602593000  |
| 1  | 6.000293000  | 2.534856000  | -1.988749000 |
| 1  | 4.567466000  | 3.423683000  | 1.971006000  |
| 1  | 6.250985000  | 3.743714000  | 0.169654000  |
| 6  | 2.541606000  | -1.327262000 | -1.148397000 |
| 6  | 1.829922000  | -2.234296000 | -1.951542000 |

|    |              |              |              |
|----|--------------|--------------|--------------|
| 6  | 3.780937000  | -1.730960000 | -0.623414000 |
| 6  | 2.348170000  | -3.497511000 | -2.238382000 |
| 6  | 4.296400000  | -2.997329000 | -0.905730000 |
| 6  | 3.583997000  | -3.884372000 | -1.715536000 |
| 1  | 0.861880000  | -1.958999000 | -2.353603000 |
| 1  | 4.348729000  | -1.051533000 | 0.004848000  |
| 1  | 1.784223000  | -4.180070000 | -2.868417000 |
| 1  | 5.258089000  | -3.289231000 | -0.492839000 |
| 1  | 3.986489000  | -4.869060000 | -1.935116000 |
| 1  | 1.056073000  | 2.074484000  | -2.030077000 |
| 6  | -0.425173000 | 0.547760000  | -2.448005000 |
| 1  | -0.925899000 | 1.235256000  | -3.136016000 |
| 1  | -0.448207000 | -0.438762000 | -2.915728000 |
| 15 | -1.394437000 | 0.453191000  | -0.830412000 |
| 6  | -2.409098000 | 1.998963000  | -0.901416000 |
| 6  | -2.299398000 | 2.966220000  | 0.104911000  |
| 6  | -3.299812000 | 2.223609000  | -1.965932000 |
| 6  | -3.057575000 | 4.139443000  | 0.046470000  |
| 6  | -4.057629000 | 3.391971000  | -2.022719000 |
| 6  | -3.936109000 | 4.354533000  | -1.015293000 |
| 1  | -1.617805000 | 2.793129000  | 0.930675000  |
| 1  | -3.413000000 | 1.474910000  | -2.745543000 |
| 1  | -2.961513000 | 4.881440000  | 0.834359000  |
| 1  | -4.744060000 | 3.551754000  | -2.849697000 |
| 1  | -4.526534000 | 5.265576000  | -1.059220000 |
| 6  | -2.671118000 | -0.841199000 | -1.134730000 |
| 6  | -2.388967000 | -2.011295000 | -1.857569000 |
| 6  | -3.912549000 | -0.740542000 | -0.483690000 |
| 6  | -3.324157000 | -3.044003000 | -1.940416000 |
| 6  | -4.845187000 | -1.774364000 | -0.563734000 |
| 6  | -4.556107000 | -2.930331000 | -1.292643000 |
| 1  | -1.430335000 | -2.137515000 | -2.349613000 |
| 1  | -4.147505000 | 0.146118000  | 0.096095000  |
| 1  | -3.086404000 | -3.939421000 | -2.508161000 |
| 1  | -5.797641000 | -1.677450000 | -0.050151000 |
| 1  | -5.282471000 | -3.735759000 | -1.352674000 |
| 1  | -2.374260000 | -2.772027000 | 0.832072000  |
| 1  | -0.165419000 | -2.568920000 | 0.105482000  |
| 1  | -1.535156000 | -3.605733000 | 2.105691000  |

TS<sub>II-IV</sub>

E (BS1) = -2103.93361962

E (BS2) = -2104.46016537

G<sub>298.15,1M</sub> (BS2) = -2103.936954

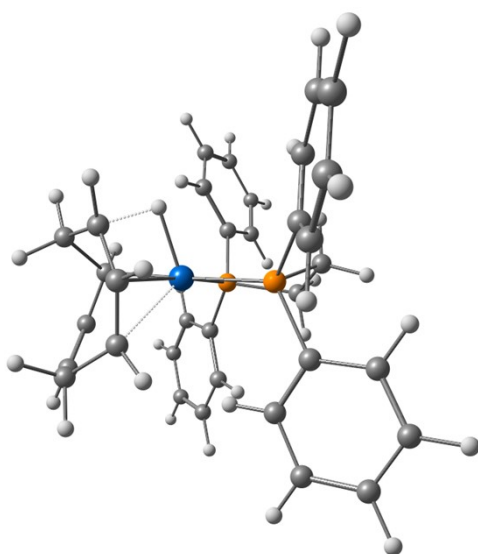

|    |              |              |              |
|----|--------------|--------------|--------------|
| 15 | 1.686397000  | 0.131714000  | -0.736151000 |
| 77 | 0.012604000  | 0.158169000  | 0.858635000  |
| 6  | 0.925560000  | 0.724409000  | -2.341127000 |
| 1  | 1.577130000  | 0.485457000  | -3.187700000 |
| 6  | 1.356411000  | -0.107345000 | 2.631738000  |
| 6  | 0.855961000  | -1.423401000 | 2.437040000  |
| 6  | -0.123324000 | -2.208266000 | 3.324119000  |
| 6  | -1.609566000 | -2.142738000 | 3.069210000  |
| 6  | -2.252630000 | -1.060786000 | 2.608428000  |
| 6  | -1.624619000 | 0.254526000  | 2.321413000  |
| 6  | -0.830511000 | 0.928405000  | 3.479057000  |
| 6  | 0.599060000  | 1.079071000  | 2.966777000  |
| 1  | -0.860532000 | 0.359755000  | 4.416440000  |
| 1  | 1.185937000  | 1.940928000  | 3.283163000  |
| 1  | 0.259600000  | 1.694186000  | 1.579455000  |
| 1  | -1.240065000 | 1.921596000  | 3.694591000  |
| 1  | -2.171528000 | -3.050322000 | 3.284066000  |
| 1  | 2.396977000  | 0.073381000  | 2.362760000  |
| 1  | -2.389622000 | 0.950564000  | 1.969180000  |
| 1  | -3.319025000 | -1.154644000 | 2.401563000  |
| 6  | 3.157339000  | 1.206555000  | -0.467630000 |
| 6  | 3.006898000  | 2.601876000  | -0.546210000 |
| 6  | 4.380639000  | 0.686574000  | -0.014581000 |
| 6  | 4.061349000  | 3.450857000  | -0.211807000 |
| 6  | 5.432102000  | 1.539128000  | 0.330505000  |
| 6  | 5.278461000  | 2.922446000  | 0.227756000  |
| 1  | 2.056994000  | 3.030480000  | -0.852506000 |
| 1  | 4.517831000  | -0.387336000 | 0.064732000  |
| 1  | 3.930144000  | 4.526765000  | -0.287960000 |
| 1  | 6.371469000  | 1.118684000  | 0.678896000  |
| 1  | 6.097413000  | 3.584829000  | 0.493319000  |
| 6  | 2.402757000  | -1.482205000 | -1.293118000 |

|    |              |              |              |
|----|--------------|--------------|--------------|
| 6  | 1.815271000  | -2.673878000 | -0.844795000 |
| 6  | 3.451338000  | -1.551117000 | -2.226474000 |
| 6  | 2.271890000  | -3.909972000 | -1.311354000 |
| 6  | 3.908125000  | -2.784892000 | -2.689588000 |
| 6  | 3.320321000  | -3.967835000 | -2.230336000 |
| 1  | 0.995521000  | -2.617405000 | -0.134690000 |
| 1  | 3.918600000  | -0.638238000 | -2.585721000 |
| 1  | 1.808239000  | -4.825136000 | -0.953178000 |
| 1  | 4.721534000  | -2.824355000 | -3.409025000 |
| 1  | 3.677286000  | -4.928198000 | -2.591933000 |
| 1  | 0.820746000  | 1.812433000  | -2.286257000 |
| 6  | -0.450496000 | 0.062469000  | -2.484254000 |
| 1  | -1.019910000 | 0.497848000  | -3.310434000 |
| 1  | -0.337155000 | -1.007719000 | -2.683984000 |
| 15 | -1.390976000 | 0.246572000  | -0.870884000 |
| 6  | -2.360076000 | 1.801858000  | -1.179950000 |
| 6  | -2.210954000 | 2.893340000  | -0.315810000 |
| 6  | -3.215844000 | 1.927493000  | -2.287977000 |
| 6  | -2.902865000 | 4.085441000  | -0.547855000 |
| 6  | -3.904502000 | 3.117336000  | -2.522848000 |
| 6  | -3.750953000 | 4.199085000  | -1.650059000 |
| 1  | -1.540690000 | 2.800052000  | 0.533974000  |
| 1  | -3.358155000 | 1.086869000  | -2.962175000 |
| 1  | -2.778546000 | 4.922476000  | 0.133948000  |
| 1  | -4.563162000 | 3.200381000  | -3.383087000 |
| 1  | -4.289587000 | 5.125089000  | -1.831760000 |
| 6  | -2.685786000 | -1.068819000 | -0.943979000 |
| 6  | -2.266468000 | -2.398397000 | -1.118331000 |
| 6  | -4.040212000 | -0.818544000 | -0.682263000 |
| 6  | -3.182408000 | -3.446650000 | -1.061883000 |
| 6  | -4.955871000 | -1.872029000 | -0.609902000 |
| 6  | -4.532108000 | -3.186595000 | -0.804999000 |
| 1  | -1.213762000 | -2.617730000 | -1.272632000 |
| 1  | -4.386091000 | 0.197998000  | -0.526913000 |
| 1  | -2.842018000 | -4.468462000 | -1.206280000 |
| 1  | -6.000991000 | -1.660783000 | -0.400312000 |
| 1  | -5.245363000 | -4.004347000 | -0.750796000 |
| 1  | 0.177124000  | -3.261081000 | 3.262574000  |
| 1  | 1.622352000  | -2.077697000 | 2.025997000  |
| 1  | 0.073778000  | -1.923992000 | 4.369860000  |

IV

E (BS1) = -2103.97452765

E (BS2) = -2104.49844470

G<sub>298.15,1M</sub> (BS2) = -2103.971557

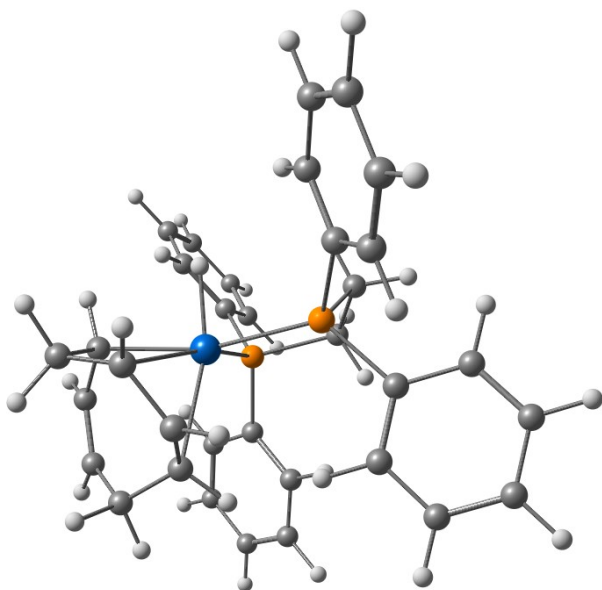

|    |              |              |              |
|----|--------------|--------------|--------------|
| 15 | -1.794693000 | -0.029384000 | -0.604375000 |
| 77 | -0.033249000 | -0.519114000 | 0.870261000  |
| 6  | -1.093853000 | -0.395304000 | -2.300473000 |
| 1  | -1.785938000 | -0.084923000 | -3.088930000 |
| 6  | -0.818621000 | 0.560547000  | 2.629828000  |
| 6  | 0.348139000  | 1.299371000  | 2.268590000  |
| 6  | 1.652734000  | 1.407933000  | 3.083302000  |
| 6  | 2.815069000  | 0.499789000  | 2.764147000  |
| 6  | 2.686390000  | -0.770443000 | 2.358294000  |
| 6  | 1.395190000  | -1.486205000 | 2.200311000  |
| 6  | 0.447646000  | -1.532055000 | 3.428270000  |
| 6  | -0.817800000 | -0.818020000 | 2.967943000  |
| 1  | 0.883209000  | -1.086343000 | 4.333171000  |
| 1  | -1.782724000 | -1.283662000 | 3.153871000  |
| 1  | -0.300957000 | -2.022624000 | 0.322987000  |
| 1  | 0.199603000  | -2.569993000 | 3.673666000  |
| 1  | 3.807254000  | 0.933859000  | 2.870440000  |
| 1  | -1.792025000 | 1.010207000  | 2.432891000  |
| 1  | 1.581015000  | -2.502675000 | 1.852269000  |
| 1  | 3.592664000  | -1.321076000 | 2.098656000  |
| 6  | -3.279486000 | -1.109916000 | -0.469351000 |
| 6  | -3.149878000 | -2.484012000 | -0.731933000 |
| 6  | -4.510771000 | -0.625577000 | -0.001829000 |
| 6  | -4.232665000 | -3.344852000 | -0.560410000 |
| 6  | -5.590473000 | -1.492728000 | 0.183227000  |
| 6  | -5.457381000 | -2.852206000 | -0.100762000 |
| 1  | -2.194044000 | -2.887132000 | -1.051930000 |
| 1  | -4.634348000 | 0.430701000  | 0.214853000  |
| 1  | -4.117055000 | -4.403263000 | -0.776757000 |
| 1  | -6.536064000 | -1.101269000 | 0.548139000  |
| 1  | -6.298422000 | -3.525130000 | 0.039990000  |
| 6  | -2.520098000 | 1.648087000  | -0.894804000 |

|    |              |              |              |
|----|--------------|--------------|--------------|
| 6  | -2.064298000 | 2.736727000  | -0.140665000 |
| 6  | -3.480904000 | 1.875421000  | -1.896248000 |
| 6  | -2.549187000 | 4.026002000  | -0.379772000 |
| 6  | -3.965014000 | 3.160486000  | -2.136622000 |
| 6  | -3.499511000 | 4.239538000  | -1.378071000 |
| 1  | -1.321139000 | 2.573175000  | 0.629164000  |
| 1  | -3.862243000 | 1.043041000  | -2.481160000 |
| 1  | -2.183427000 | 4.858277000  | 0.215105000  |
| 1  | -4.707319000 | 3.320790000  | -2.913618000 |
| 1  | -3.877770000 | 5.240283000  | -1.566820000 |
| 1  | -0.960048000 | -1.478835000 | -2.369204000 |
| 6  | 0.255485000  | 0.323282000  | -2.427733000 |
| 1  | 0.784868000  | 0.027053000  | -3.337834000 |
| 1  | 0.100418000  | 1.405425000  | -2.474498000 |
| 15 | 1.319397000  | -0.057892000 | -0.921641000 |
| 6  | 2.452769000  | -1.353680000 | -1.582952000 |
| 6  | 2.400983000  | -2.654833000 | -1.067404000 |
| 6  | 3.332984000  | -1.074828000 | -2.643406000 |
| 6  | 3.220373000  | -3.657608000 | -1.593353000 |
| 6  | 4.150289000  | -2.075681000 | -3.166468000 |
| 6  | 4.096666000  | -3.370190000 | -2.640086000 |
| 1  | 1.713085000  | -2.875689000 | -0.259673000 |
| 1  | 3.389831000  | -0.069833000 | -3.052360000 |
| 1  | 3.171907000  | -4.661950000 | -1.181881000 |
| 1  | 4.828863000  | -1.846255000 | -3.983424000 |
| 1  | 4.735146000  | -4.149294000 | -3.047167000 |
| 6  | 2.387867000  | 1.432713000  | -0.738306000 |
| 6  | 1.782257000  | 2.700435000  | -0.714229000 |
| 6  | 3.761114000  | 1.337136000  | -0.472620000 |
| 6  | 2.534648000  | 3.843860000  | -0.452804000 |
| 6  | 4.513781000  | 2.483975000  | -0.208169000 |
| 6  | 3.905394000  | 3.739271000  | -0.198725000 |
| 1  | 0.712996000  | 2.798363000  | -0.874259000 |
| 1  | 4.247308000  | 0.367896000  | -0.463835000 |
| 1  | 2.049688000  | 4.816205000  | -0.442613000 |
| 1  | 5.576639000  | 2.391172000  | -0.002803000 |
| 1  | 4.491796000  | 4.629902000  | 0.008859000  |
| 1  | 2.002829000  | 2.441122000  | 2.975600000  |
| 1  | 0.118979000  | 2.258847000  | 1.810310000  |
| 1  | 1.396034000  | 1.305919000  | 4.148628000  |

II'

E (BS1) = -2103.98805492

E (BS2) = -2104.51145700

G<sub>298.15,1M</sub> (BS2) = -2103.984063

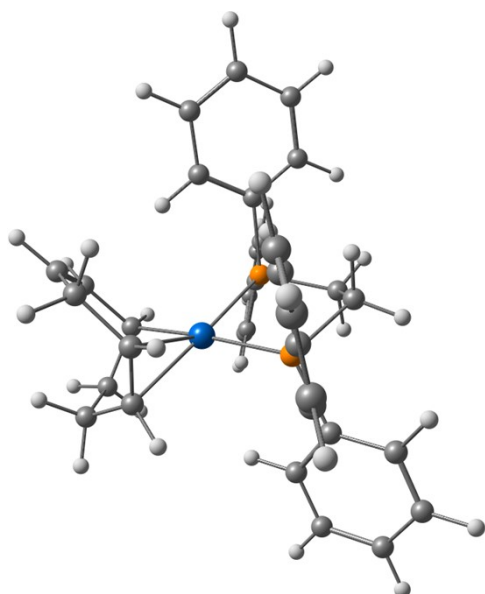

|    |              |              |              |
|----|--------------|--------------|--------------|
| 15 | 1.492978000  | 0.189080000  | -0.920301000 |
| 77 | 0.024655000  | 0.115654000  | 0.853667000  |
| 6  | 0.562227000  | 0.743307000  | -2.446815000 |
| 1  | 1.135678000  | 0.584958000  | -3.364973000 |
| 6  | 1.519709000  | 0.273223000  | 2.389155000  |
| 6  | 1.908214000  | -1.040402000 | 3.006060000  |
| 6  | 1.118160000  | -2.101317000 | 3.237741000  |
| 6  | -0.324276000 | -2.300949000 | 2.840775000  |
| 6  | -1.122095000 | -1.178795000 | 2.195853000  |
| 6  | -1.254358000 | 0.138096000  | 2.684597000  |
| 6  | -0.479827000 | 0.673002000  | 3.885714000  |
| 6  | 0.893677000  | 1.213684000  | 3.452038000  |
| 1  | -1.063382000 | 1.453141000  | 4.388426000  |
| 1  | -0.336498000 | -0.133138000 | 4.616593000  |
| 1  | 1.547048000  | 1.342148000  | 4.331606000  |
| 1  | 0.765147000  | 2.210830000  | 3.009644000  |
| 1  | -0.888081000 | -2.626093000 | 3.732808000  |
| 1  | 2.437802000  | 0.753669000  | 2.024875000  |
| 1  | -2.182417000 | 0.658035000  | 2.448141000  |
| 1  | -1.969585000 | -1.571782000 | 1.636440000  |
| 6  | 2.918573000  | 1.349755000  | -0.857315000 |
| 6  | 2.707404000  | 2.574712000  | -0.201550000 |
| 6  | 4.177796000  | 1.080286000  | -1.410054000 |
| 6  | 3.730465000  | 3.518542000  | -0.117621000 |
| 6  | 5.204152000  | 2.023392000  | -1.316276000 |
| 6  | 4.982495000  | 3.243124000  | -0.674248000 |
| 1  | 1.742425000  | 2.773281000  | 0.259578000  |
| 1  | 4.364811000  | 0.132961000  | -1.905852000 |
| 1  | 3.555272000  | 4.460681000  | 0.394278000  |
| 1  | 6.178294000  | 1.801781000  | -1.743599000 |
| 1  | 5.783517000  | 3.973325000  | -0.600364000 |
| 6  | 2.197497000  | -1.447674000 | -1.386962000 |

|    |              |              |              |
|----|--------------|--------------|--------------|
| 6  | 2.326831000  | -2.424123000 | -0.385640000 |
| 6  | 2.593600000  | -1.759796000 | -2.697671000 |
| 6  | 2.846451000  | -3.682737000 | -0.690757000 |
| 6  | 3.105895000  | -3.023137000 | -3.000744000 |
| 6  | 3.234164000  | -3.986519000 | -1.997895000 |
| 1  | 2.011349000  | -2.193411000 | 0.627372000  |
| 1  | 2.508257000  | -1.023341000 | -3.490470000 |
| 1  | 2.941732000  | -4.427460000 | 0.094657000  |
| 1  | 3.403905000  | -3.252946000 | -4.019993000 |
| 1  | 3.631312000  | -4.969424000 | -2.235940000 |
| 1  | 0.426831000  | 1.825047000  | -2.331548000 |
| 6  | -0.793743000 | 0.030356000  | -2.486048000 |
| 1  | -1.442293000 | 0.446185000  | -3.262738000 |
| 1  | -0.656886000 | -1.034581000 | -2.701379000 |
| 15 | -1.602719000 | 0.161351000  | -0.790589000 |
| 6  | -2.569614000 | 1.728212000  | -0.957090000 |
| 6  | -2.367118000 | 2.737550000  | -0.003687000 |
| 6  | -3.465779000 | 1.963212000  | -2.013473000 |
| 6  | -3.045619000 | 3.955192000  | -0.101746000 |
| 6  | -4.145551000 | 3.177393000  | -2.109968000 |
| 6  | -3.936542000 | 4.175667000  | -1.153262000 |
| 1  | -1.666233000 | 2.556027000  | 0.807529000  |
| 1  | -3.644422000 | 1.190295000  | -2.756262000 |
| 1  | -2.878231000 | 4.728339000  | 0.643081000  |
| 1  | -4.838743000 | 3.345483000  | -2.929632000 |
| 1  | -4.465784000 | 5.121402000  | -1.230407000 |
| 6  | -2.872996000 | -1.175542000 | -0.849834000 |
| 6  | -2.405222000 | -2.496259000 | -0.982998000 |
| 6  | -4.241528000 | -0.966011000 | -0.627452000 |
| 6  | -3.288739000 | -3.573028000 | -0.932884000 |
| 6  | -5.124795000 | -2.047888000 | -0.567719000 |
| 6  | -4.653988000 | -3.351537000 | -0.726761000 |
| 1  | -1.340672000 | -2.680532000 | -1.104946000 |
| 1  | -4.624189000 | 0.041521000  | -0.501379000 |
| 1  | -2.910858000 | -4.585683000 | -1.044068000 |
| 1  | -6.182574000 | -1.867562000 | -0.396493000 |
| 1  | -5.342742000 | -4.190419000 | -0.681520000 |
| 1  | -0.364047000 | -3.163787000 | 2.158815000  |
| 1  | 2.945068000  | -1.132531000 | 3.345224000  |
| 1  | 1.553772000  | -2.966232000 | 3.740727000  |



TS<sub>II'-4'</sub>

E (BS1) = -2103.951725

E (BS2) = -2104.476139

G<sub>298.15,1M</sub> (BS2) = -2103.952333

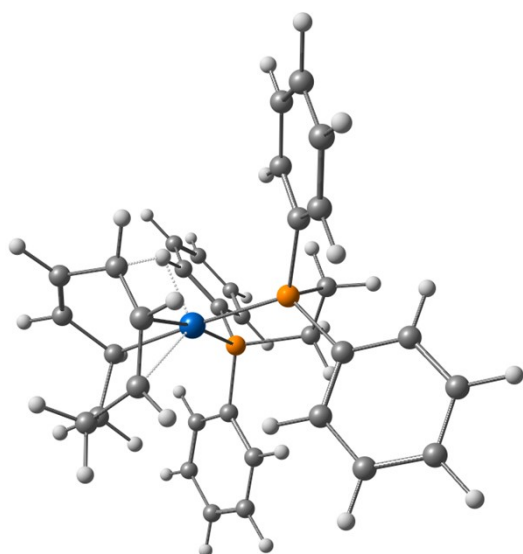

|    |              |              |              |
|----|--------------|--------------|--------------|
| 15 | 1.388884000  | 0.078322000  | -0.903785000 |
| 77 | 0.000655000  | -0.333102000 | 0.787452000  |
| 6  | 0.439872000  | 0.612665000  | -2.431891000 |
| 1  | 1.017559000  | 0.392605000  | -3.334293000 |
| 6  | 1.720079000  | -0.666202000 | 2.070878000  |
| 6  | 1.473520000  | -1.825381000 | 3.007135000  |
| 6  | 0.241230000  | -2.304521000 | 3.204686000  |
| 6  | -0.908944000 | -1.761215000 | 2.413345000  |
| 6  | -1.374720000 | -0.374984000 | 2.569412000  |
| 6  | -0.635175000 | 0.784408000  | 2.877302000  |
| 6  | 0.636260000  | 0.913723000  | 3.713140000  |
| 6  | 1.918339000  | 0.611390000  | 2.920284000  |
| 1  | 0.680432000  | 1.930877000  | 4.119571000  |
| 1  | 0.573195000  | 0.240641000  | 4.576010000  |
| 1  | 2.775687000  | 0.514647000  | 3.610437000  |
| 1  | 2.139345000  | 1.452408000  | 2.254260000  |
| 1  | -1.740083000 | -2.453432000 | 2.276623000  |
| 1  | 2.650722000  | -0.851296000 | 1.516420000  |
| 1  | -1.233154000 | 1.692132000  | 2.821590000  |
| 1  | -2.414966000 | -0.215685000 | 2.285578000  |
| 6  | 2.624468000  | 1.428563000  | -0.643332000 |
| 6  | 2.154531000  | 2.749133000  | -0.533760000 |
| 6  | 3.978499000  | 1.172823000  | -0.384108000 |
| 6  | 3.021972000  | 3.788412000  | -0.204072000 |
| 6  | 4.844405000  | 2.213741000  | -0.035919000 |
| 6  | 4.371933000  | 3.523047000  | 0.049040000  |
| 1  | 1.099861000  | 2.963756000  | -0.683368000 |
| 1  | 4.362732000  | 0.160330000  | -0.449636000 |
| 1  | 2.643682000  | 4.804672000  | -0.133982000 |
| 1  | 5.889148000  | 1.996004000  | 0.168466000  |
| 1  | 5.045998000  | 4.331788000  | 0.316975000  |
| 6  | 2.431362000  | -1.311581000 | -1.554105000 |
| 6  | 2.338121000  | -2.576916000 | -0.961523000 |

|    |              |              |              |
|----|--------------|--------------|--------------|
| 6  | 3.293181000  | -1.135114000 | -2.649823000 |
| 6  | 3.092700000  | -3.646665000 | -1.450654000 |
| 6  | 4.043004000  | -2.203448000 | -3.141488000 |
| 6  | 3.944389000  | -3.462470000 | -2.540838000 |
| 1  | 1.667615000  | -2.710365000 | -0.117010000 |
| 1  | 3.392169000  | -0.155777000 | -3.111061000 |
| 1  | 3.014097000  | -4.621838000 | -0.977791000 |
| 1  | 4.705422000  | -2.054433000 | -3.989870000 |
| 1  | 4.530636000  | -4.294006000 | -2.922314000 |
| 1  | 0.305772000  | 1.697486000  | -2.379453000 |
| 6  | -0.924628000 | -0.087253000 | -2.452133000 |
| 1  | -1.580746000 | 0.332993000  | -3.220863000 |
| 1  | -0.803563000 | -1.156403000 | -2.652331000 |
| 15 | -1.686927000 | 0.089508000  | -0.752788000 |
| 6  | -2.410557000 | 1.786845000  | -0.873996000 |
| 6  | -1.887912000 | 2.798755000  | -0.056260000 |
| 6  | -3.399117000 | 2.117129000  | -1.816945000 |
| 6  | -2.345195000 | 4.114422000  | -0.173998000 |
| 6  | -3.855251000 | 3.429974000  | -1.933938000 |
| 6  | -3.328630000 | 4.431464000  | -1.111875000 |
| 1  | -1.113060000 | 2.542137000  | 0.660481000  |
| 1  | -3.820214000 | 1.344782000  | -2.454917000 |
| 1  | -1.931328000 | 4.888365000  | 0.466604000  |
| 1  | -4.620710000 | 3.673059000  | -2.665817000 |
| 1  | -3.684273000 | 5.453841000  | -1.205334000 |
| 6  | -3.146908000 | -1.032010000 | -0.763470000 |
| 6  | -2.949404000 | -2.382393000 | -1.102334000 |
| 6  | -4.408097000 | -0.632843000 | -0.294495000 |
| 6  | -3.993917000 | -3.300170000 | -1.003626000 |
| 6  | -5.450645000 | -1.557121000 | -0.185382000 |
| 6  | -5.249428000 | -2.890056000 | -0.544754000 |
| 1  | -1.969541000 | -2.722387000 | -1.425490000 |
| 1  | -4.582375000 | 0.401603000  | -0.015980000 |
| 1  | -3.826118000 | -4.338083000 | -1.277818000 |
| 1  | -6.420539000 | -1.230697000 | 0.179747000  |
| 1  | -6.061146000 | -3.607295000 | -0.462704000 |
| 1  | -0.396772000 | -1.959417000 | 1.000209000  |
| 1  | 2.302033000  | -2.185492000 | 3.623793000  |
| 1  | 0.026652000  | -3.083020000 | 3.935077000  |

4'

E (BS1) = -2103.990169

E (BS2) = -2104.511906

G<sub>298.15,1M</sub> (BS2) = -2103.983184

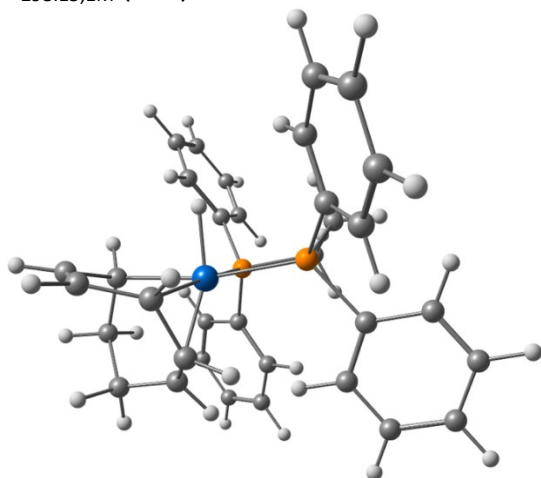

|    |              |              |              |
|----|--------------|--------------|--------------|
| 15 | 1.422359000  | 0.055345000  | -0.845605000 |
| 77 | -0.050303000 | -0.523619000 | 0.840602000  |
| 6  | 0.445390000  | 0.658320000  | -2.336596000 |
| 1  | 1.021693000  | 0.491211000  | -3.251127000 |
| 6  | 1.448606000  | -1.462445000 | 2.090897000  |
| 6  | 0.756516000  | -2.212532000 | 3.203528000  |
| 6  | -0.527581000 | -1.957681000 | 3.466033000  |
| 6  | -1.284883000 | -0.998763000 | 2.605832000  |
| 6  | -1.042799000 | 0.429020000  | 2.559010000  |
| 6  | 0.225184000  | 1.060747000  | 2.569415000  |
| 6  | 1.439923000  | 0.671651000  | 3.414257000  |
| 6  | 2.335678000  | -0.370900000 | 2.725938000  |
| 1  | 2.017185000  | 1.577321000  | 3.632742000  |
| 1  | 1.098318000  | 0.278882000  | 4.378193000  |
| 1  | 3.051555000  | -0.792414000 | 3.453186000  |
| 1  | 2.927707000  | 0.122361000  | 1.949622000  |
| 1  | -2.330238000 | -1.264007000 | 2.443233000  |
| 1  | 2.088157000  | -2.146354000 | 1.518969000  |
| 1  | 0.194646000  | 2.117057000  | 2.306145000  |
| 1  | -1.890863000 | 1.046156000  | 2.262382000  |
| 6  | 2.610732000  | 1.431086000  | -0.524536000 |
| 6  | 2.116876000  | 2.740450000  | -0.395957000 |
| 6  | 3.968935000  | 1.196950000  | -0.260018000 |
| 6  | 2.961695000  | 3.787888000  | -0.032285000 |
| 6  | 4.812562000  | 2.246379000  | 0.112189000  |
| 6  | 4.313964000  | 3.544443000  | 0.224135000  |
| 1  | 1.063755000  | 2.946438000  | -0.560506000 |
| 1  | 4.372870000  | 0.193127000  | -0.338674000 |
| 1  | 2.562355000  | 4.794575000  | 0.055412000  |
| 1  | 5.860183000  | 2.043943000  | 0.316465000  |
| 1  | 4.970568000  | 4.360069000  | 0.513173000  |
| 6  | 2.465910000  | -1.259387000 | -1.620148000 |
| 6  | 2.295966000  | -2.603158000 | -1.260966000 |
| 6  | 3.390273000  | -0.939140000 | -2.631086000 |
| 6  | 3.040373000  | -3.604630000 | -1.891293000 |
| 6  | 4.132172000  | -1.938606000 | -3.258347000 |
| 6  | 3.959600000  | -3.275721000 | -2.887330000 |

|    |              |              |              |
|----|--------------|--------------|--------------|
| 1  | 1.572789000  | -2.861026000 | -0.495804000 |
| 1  | 3.539512000  | 0.096939000  | -2.922026000 |
| 1  | 2.898583000  | -4.641583000 | -1.599818000 |
| 1  | 4.843954000  | -1.674861000 | -4.035691000 |
| 1  | 4.538341000  | -4.054833000 | -3.375582000 |
| 1  | 0.295380000  | 1.737196000  | -2.231197000 |
| 6  | -0.911794000 | -0.053713000 | -2.386823000 |
| 1  | -1.555246000 | 0.367550000  | -3.165414000 |
| 1  | -0.780439000 | -1.121004000 | -2.588662000 |
| 15 | -1.704339000 | 0.118841000  | -0.703202000 |
| 6  | -2.338641000 | 1.851365000  | -0.823329000 |
| 6  | -1.745630000 | 2.844026000  | -0.031432000 |
| 6  | -3.324803000 | 2.226031000  | -1.752424000 |
| 6  | -2.129853000 | 4.182037000  | -0.157654000 |
| 6  | -3.709928000 | 3.560520000  | -1.877770000 |
| 6  | -3.113323000 | 4.541610000  | -1.079376000 |
| 1  | -0.971329000 | 2.564474000  | 0.673215000  |
| 1  | -3.798420000 | 1.471051000  | -2.373606000 |
| 1  | -1.659835000 | 4.938621000  | 0.464470000  |
| 1  | -4.474389000 | 3.836356000  | -2.598823000 |
| 1  | -3.414415000 | 5.580716000  | -1.178459000 |
| 6  | -3.217868000 | -0.922392000 | -0.769451000 |
| 6  | -3.103039000 | -2.258872000 | -1.187773000 |
| 6  | -4.456576000 | -0.468213000 | -0.291067000 |
| 6  | -4.208340000 | -3.107642000 | -1.161184000 |
| 6  | -5.560087000 | -1.324274000 | -0.254850000 |
| 6  | -5.441413000 | -2.642858000 | -0.694912000 |
| 1  | -2.142518000 | -2.645194000 | -1.514871000 |
| 1  | -4.566645000 | 0.556223000  | 0.049862000  |
| 1  | -4.104057000 | -4.136412000 | -1.494407000 |
| 1  | -6.511982000 | -0.956604000 | 0.118143000  |
| 1  | -6.300270000 | -3.307395000 | -0.668759000 |
| 1  | -0.235181000 | -1.973362000 | 0.163525000  |
| 1  | 1.347767000  | -2.851399000 | 3.866135000  |
| 1  | -1.049229000 | -2.417483000 | 4.306507000  |

TS<sub>II'-III'</sub>

E (BS1) = -2103.941722

E (BS2) = -2104.466884

G<sub>298.15,1M</sub> (BS2) = -2103.943826

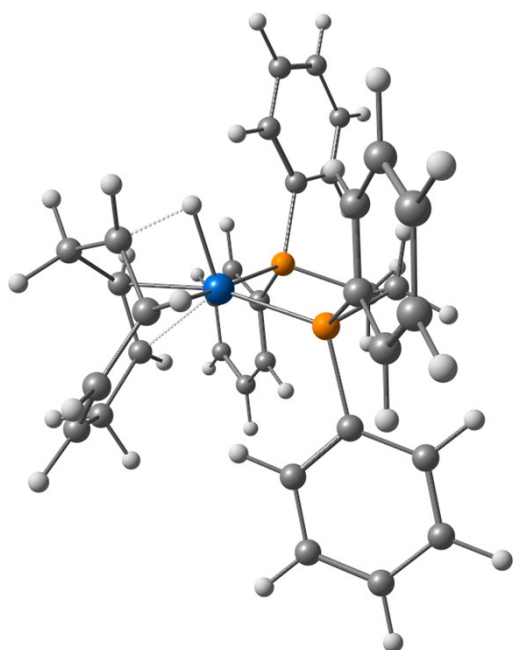

|    |              |              |              |
|----|--------------|--------------|--------------|
| 15 | 1.462054000  | 0.355422000  | -0.826189000 |
| 77 | -0.004634000 | 0.030758000  | 0.882642000  |
| 6  | 0.522396000  | 1.052204000  | -2.290155000 |
| 1  | 1.097884000  | 0.960794000  | -3.216043000 |
| 6  | 1.626983000  | -0.009925000 | 2.381989000  |
| 6  | 2.159644000  | -1.282860000 | 2.919062000  |
| 6  | 1.597460000  | -2.498279000 | 2.966384000  |
| 6  | 0.274488000  | -2.935766000 | 2.404499000  |
| 6  | -0.703970000 | -1.927417000 | 1.837586000  |
| 6  | -1.246489000 | -0.804645000 | 2.520438000  |
| 6  | -0.561040000 | -0.088050000 | 3.689612000  |
| 6  | 0.537279000  | 0.728478000  | 3.009918000  |
| 1  | -1.274643000 | 0.576780000  | 4.184401000  |
| 1  | -0.147193000 | -0.764313000 | 4.450196000  |
| 1  | 0.741429000  | 1.728901000  | 3.389678000  |
| 1  | -0.178410000 | 1.450004000  | 1.802875000  |
| 1  | -0.247362000 | -3.506177000 | 3.192323000  |
| 1  | 2.434987000  | 0.648347000  | 2.059308000  |
| 1  | -2.302265000 | -0.581710000 | 2.385918000  |
| 1  | -1.401948000 | -2.400890000 | 1.151557000  |
| 6  | 2.809278000  | 1.599475000  | -0.578072000 |
| 6  | 2.417190000  | 2.883183000  | -0.158723000 |
| 6  | 4.177413000  | 1.320931000  | -0.701192000 |
| 6  | 3.366654000  | 3.870955000  | 0.097058000  |
| 6  | 5.130010000  | 2.308069000  | -0.430150000 |
| 6  | 4.729102000  | 3.585191000  | -0.037465000 |
| 1  | 1.360536000  | 3.095488000  | -0.014173000 |
| 1  | 4.507125000  | 0.333298000  | -1.005469000 |
| 1  | 3.045305000  | 4.860298000  | 0.411684000  |
| 1  | 6.186825000  | 2.073638000  | -0.526033000 |

|    |              |              |              |
|----|--------------|--------------|--------------|
| 1  | 5.470777000  | 4.351549000  | 0.169877000  |
| 6  | 2.341876000  | -1.094392000 | -1.578146000 |
| 6  | 2.256320000  | -2.330222000 | -0.922809000 |
| 6  | 3.043453000  | -1.018382000 | -2.793447000 |
| 6  | 2.857997000  | -3.467447000 | -1.467312000 |
| 6  | 3.636682000  | -2.155913000 | -3.342771000 |
| 6  | 3.544633000  | -3.383464000 | -2.679923000 |
| 1  | 1.703514000  | -2.383305000 | 0.010425000  |
| 1  | 3.139074000  | -0.067338000 | -3.310479000 |
| 1  | 2.785535000  | -4.417946000 | -0.945424000 |
| 1  | 4.171474000  | -2.084749000 | -4.286131000 |
| 1  | 4.006318000  | -4.268600000 | -3.109043000 |
| 1  | 0.376567000  | 2.118862000  | -2.090138000 |
| 6  | -0.825098000 | 0.333842000  | -2.398540000 |
| 1  | -1.490363000 | 0.828179000  | -3.112694000 |
| 1  | -0.675027000 | -0.694797000 | -2.739787000 |
| 15 | -1.626006000 | 0.259206000  | -0.702735000 |
| 6  | -2.726586000 | 1.753414000  | -0.739491000 |
| 6  | -2.583927000 | 2.743512000  | 0.238971000  |
| 6  | -3.685644000 | 1.934085000  | -1.751744000 |
| 6  | -3.380155000 | 3.892206000  | 0.212083000  |
| 6  | -4.480254000 | 3.079536000  | -1.780674000 |
| 6  | -4.327556000 | 4.062880000  | -0.797850000 |
| 1  | -1.838424000 | 2.604270000  | 1.017511000  |
| 1  | -3.824524000 | 1.169118000  | -2.511153000 |
| 1  | -3.258168000 | 4.651417000  | 0.979933000  |
| 1  | -5.218978000 | 3.205496000  | -2.567522000 |
| 1  | -4.946435000 | 4.955627000  | -0.820666000 |
| 6  | -2.827578000 | -1.134225000 | -0.851600000 |
| 6  | -2.364362000 | -2.379228000 | -1.312314000 |
| 6  | -4.147808000 | -1.038354000 | -0.387072000 |
| 6  | -3.209199000 | -3.488273000 | -1.337152000 |
| 6  | -4.990411000 | -2.153069000 | -0.402988000 |
| 6  | -4.526717000 | -3.378218000 | -0.883581000 |
| 1  | -1.331290000 | -2.489399000 | -1.628822000 |
| 1  | -4.525043000 | -0.091036000 | -0.015444000 |
| 1  | -2.835925000 | -4.440907000 | -1.702831000 |
| 1  | -6.010523000 | -2.060013000 | -0.040625000 |
| 1  | -5.183596000 | -4.243311000 | -0.898865000 |
| 1  | 0.484509000  | -3.685158000 | 1.625044000  |
| 1  | 3.169684000  | -1.197858000 | 3.326176000  |
| 1  | 2.172261000  | -3.301382000 | 3.428307000  |

III'

E (BS1) = -2103.97501012

E (BS2) = -2104.49800014

G<sub>298.15,1M</sub> (BS2) = -2103.971391

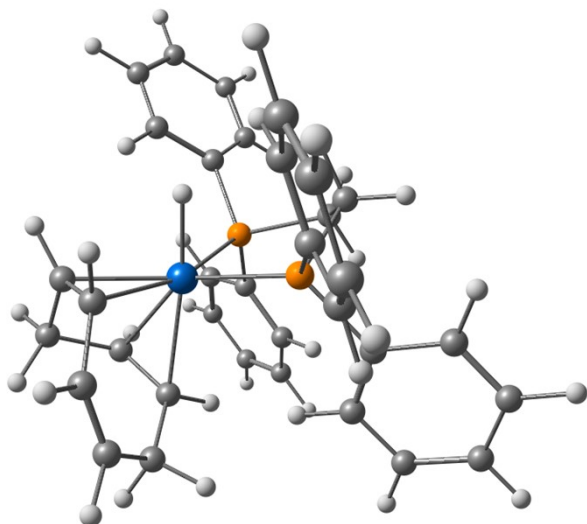

|    |              |              |              |
|----|--------------|--------------|--------------|
| 15 | -1.490131000 | -0.003123000 | -0.880542000 |
| 77 | 0.021064000  | -0.602680000 | 0.802735000  |
| 6  | -0.534344000 | -0.292835000 | -2.470047000 |
| 1  | -1.093044000 | 0.074893000  | -3.335954000 |
| 6  | -1.172618000 | -1.646285000 | 2.303339000  |
| 6  | -2.121759000 | -0.903996000 | 3.165594000  |
| 6  | -2.116215000 | 0.383141000  | 3.542337000  |
| 6  | -1.198034000 | 1.500018000  | 3.120386000  |
| 6  | 0.038463000  | 1.232995000  | 2.280549000  |
| 6  | 1.077553000  | 0.348809000  | 2.592859000  |
| 6  | 0.930837000  | -0.838486000 | 3.532801000  |
| 6  | 0.234760000  | -1.820128000 | 2.606829000  |
| 1  | 1.915517000  | -1.208755000 | 3.829982000  |
| 1  | 0.361751000  | -0.606226000 | 4.443056000  |
| 1  | 0.684682000  | -2.801426000 | 2.479450000  |
| 1  | -0.068207000 | -1.973943000 | -0.036151000 |
| 1  | -0.873148000 | 2.028370000  | 4.032888000  |
| 1  | -1.636859000 | -2.526408000 | 1.858143000  |
| 1  | 2.086426000  | 0.605497000  | 2.283677000  |
| 1  | 0.360883000  | 2.106913000  | 1.717905000  |
| 6  | -2.976576000 | -1.076868000 | -1.040322000 |
| 6  | -2.813709000 | -2.436012000 | -1.358342000 |
| 6  | -4.262563000 | -0.606873000 | -0.731723000 |
| 6  | -3.912430000 | -3.293686000 | -1.395113000 |
| 6  | -5.360027000 | -1.470010000 | -0.760191000 |
| 6  | -5.190751000 | -2.813486000 | -1.097835000 |
| 1  | -1.822968000 | -2.833464000 | -1.556358000 |
| 1  | -4.411659000 | 0.435012000  | -0.467482000 |
| 1  | -3.768735000 | -4.340074000 | -1.650260000 |
| 1  | -6.348013000 | -1.088741000 | -0.517008000 |
| 1  | -6.045351000 | -3.483639000 | -1.122530000 |
| 6  | -2.148589000 | 1.694779000  | -1.206771000 |
| 6  | -1.769795000 | 2.753720000  | -0.373942000 |
| 6  | -2.960687000 | 1.968863000  | -2.321524000 |

|    |              |              |              |
|----|--------------|--------------|--------------|
| 6  | -2.186522000 | 4.060679000  | -0.642785000 |
| 6  | -3.379174000 | 3.271457000  | -2.590408000 |
| 6  | -2.990765000 | 4.321685000  | -1.752055000 |
| 1  | -1.141428000 | 2.543282000  | 0.480830000  |
| 1  | -3.277337000 | 1.160263000  | -2.974433000 |
| 1  | -1.881872000 | 4.869832000  | 0.015315000  |
| 1  | -4.007281000 | 3.468886000  | -3.454748000 |
| 1  | -3.316293000 | 5.336121000  | -1.964660000 |
| 1  | -0.407324000 | -1.373584000 | -2.581152000 |
| 6  | 0.832914000  | 0.397921000  | -2.362777000 |
| 1  | 1.481962000  | 0.118415000  | -3.197693000 |
| 1  | 0.703822000  | 1.484197000  | -2.397910000 |
| 15 | 1.659510000  | -0.026617000 | -0.720340000 |
| 6  | 2.919994000  | -1.280614000 | -1.222599000 |
| 6  | 2.938579000  | -2.527302000 | -0.584687000 |
| 6  | 3.857720000  | -1.018576000 | -2.236310000 |
| 6  | 3.871177000  | -3.499528000 | -0.957734000 |
| 6  | 4.788655000  | -1.987939000 | -2.607214000 |
| 6  | 4.795075000  | -3.232449000 | -1.968721000 |
| 1  | 2.212709000  | -2.723341000 | 0.199255000  |
| 1  | 3.870624000  | -0.048987000 | -2.727322000 |
| 1  | 3.873626000  | -4.463986000 | -0.457319000 |
| 1  | 5.509227000  | -1.774139000 | -3.391933000 |
| 1  | 5.519441000  | -3.988253000 | -2.259572000 |
| 6  | 2.674320000  | 1.465859000  | -0.345459000 |
| 6  | 2.065344000  | 2.733229000  | -0.367403000 |
| 6  | 3.996140000  | 1.365079000  | 0.117437000  |
| 6  | 2.767966000  | 3.868948000  | 0.034755000  |
| 6  | 4.696159000  | 2.503004000  | 0.524863000  |
| 6  | 4.087033000  | 3.758284000  | 0.481945000  |
| 1  | 1.034126000  | 2.836720000  | -0.691118000 |
| 1  | 4.485890000  | 0.397104000  | 0.154275000  |
| 1  | 2.282182000  | 4.840432000  | 0.002426000  |
| 1  | 5.720205000  | 2.405512000  | 0.874805000  |
| 1  | 4.633614000  | 4.642553000  | 0.797035000  |
| 1  | -1.818722000 | 2.236521000  | 2.588681000  |
| 1  | -2.941938000 | -1.513105000 | 3.552611000  |
| 1  | -2.907885000 | 0.709655000  | 4.217538000  |

TS<sub>II'-IV'</sub>

E (BS1) = -2103.93553307

E (BS2) = -2104.46162337

G<sub>298.15,1M</sub> (BS2) = -2103.938989

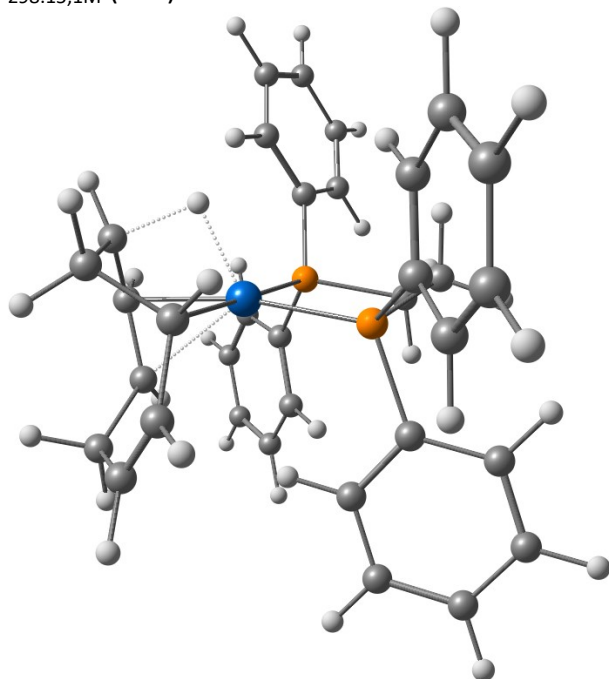

|    |              |              |              |
|----|--------------|--------------|--------------|
| 15 | -1.411601000 | -0.271407000 | -0.894363000 |
| 77 | -0.043157000 | -0.255643000 | 0.867182000  |
| 6  | -0.458976000 | -0.799840000 | -2.415208000 |
| 1  | -1.024643000 | -0.591129000 | -3.328574000 |
| 6  | -1.693519000 | -0.386630000 | 2.303209000  |
| 6  | -2.410666000 | 0.888751000  | 2.554711000  |
| 6  | -1.835467000 | 2.029687000  | 2.959044000  |
| 6  | -0.352780000 | 2.226208000  | 3.164795000  |
| 6  | 0.679766000  | 1.427077000  | 2.352498000  |
| 6  | 1.250554000  | 0.154362000  | 2.634806000  |
| 6  | 0.548037000  | -1.067710000 | 2.990131000  |
| 6  | -0.885061000 | -0.965930000 | 3.500700000  |
| 1  | 0.229075000  | -1.768382000 | 1.680634000  |
| 1  | 1.179732000  | -1.877052000 | 3.357251000  |
| 1  | -0.941907000 | -0.348766000 | 4.405459000  |
| 1  | -1.250231000 | -1.964650000 | 3.764325000  |
| 1  | -0.120116000 | 2.082739000  | 4.232131000  |
| 1  | -2.396077000 | -1.142806000 | 1.947248000  |
| 1  | 2.307456000  | 0.029272000  | 2.400907000  |
| 1  | 1.420596000  | 2.093508000  | 1.913702000  |
| 6  | -2.862769000 | -1.412056000 | -0.855594000 |
| 6  | -2.598850000 | -2.786907000 | -0.736539000 |
| 6  | -4.193641000 | -0.974284000 | -0.823724000 |
| 6  | -3.641566000 | -3.704264000 | -0.624428000 |
| 6  | -5.238964000 | -1.894195000 | -0.696226000 |
| 6  | -4.967365000 | -3.259199000 | -0.603859000 |
| 1  | -1.569355000 | -3.134045000 | -0.704910000 |
| 1  | -4.420594000 | 0.084498000  | -0.891940000 |
| 1  | -3.420764000 | -4.765032000 | -0.541601000 |
| 1  | -6.265620000 | -1.539312000 | -0.667860000 |
| 1  | -5.780571000 | -3.973145000 | -0.507097000 |

|    |              |              |              |
|----|--------------|--------------|--------------|
| 6  | -2.128599000 | 1.343273000  | -1.463002000 |
| 6  | -1.855269000 | 2.497577000  | -0.716755000 |
| 6  | -2.870141000 | 1.460596000  | -2.650616000 |
| 6  | -2.312348000 | 3.745723000  | -1.147823000 |
| 6  | -3.323078000 | 2.707443000  | -3.083303000 |
| 6  | -3.042469000 | 3.853351000  | -2.332628000 |
| 1  | -1.280773000 | 2.399041000  | 0.199504000  |
| 1  | -3.105565000 | 0.575258000  | -3.235249000 |
| 1  | -2.096227000 | 4.632069000  | -0.557367000 |
| 1  | -3.892763000 | 2.786004000  | -4.005324000 |
| 1  | -3.394045000 | 4.824131000  | -2.671315000 |
| 1  | -0.317121000 | -1.882959000 | -2.344478000 |
| 6  | 0.890161000  | -0.073447000 | -2.413985000 |
| 1  | 1.571112000  | -0.486562000 | -3.163792000 |
| 1  | 0.747624000  | 0.987082000  | -2.644208000 |
| 15 | 1.662737000  | -0.182198000 | -0.704605000 |
| 6  | 2.850725000  | -1.587846000 | -0.889125000 |
| 6  | 2.763389000  | -2.676214000 | -0.011503000 |
| 6  | 3.825275000  | -1.609937000 | -1.902128000 |
| 6  | 3.634287000  | -3.762343000 | -0.135650000 |
| 6  | 4.691736000  | -2.695061000 | -2.029482000 |
| 6  | 4.597713000  | -3.774129000 | -1.144807000 |
| 1  | 1.999880000  | -2.670800000 | 0.761033000  |
| 1  | 3.918186000  | -0.768506000 | -2.583659000 |
| 1  | 3.555182000  | -4.598631000 | 0.553561000  |
| 1  | 5.441062000  | -2.699174000 | -2.816405000 |
| 1  | 5.273817000  | -4.618747000 | -1.244353000 |
| 6  | 2.756555000  | 1.304441000  | -0.641129000 |
| 6  | 2.155384000  | 2.562736000  | -0.827646000 |
| 6  | 4.109528000  | 1.253583000  | -0.275372000 |
| 6  | 2.896706000  | 3.734015000  | -0.684931000 |
| 6  | 4.848065000  | 2.430452000  | -0.119104000 |
| 6  | 4.247723000  | 3.671974000  | -0.328933000 |
| 1  | 1.096728000  | 2.626256000  | -1.063303000 |
| 1  | 4.594838000  | 0.296512000  | -0.113045000 |
| 1  | 2.416449000  | 4.696337000  | -0.840251000 |
| 1  | 5.895292000  | 2.371925000  | 0.164944000  |
| 1  | 4.823514000  | 4.585380000  | -0.209304000 |
| 1  | -0.136584000 | 3.285654000  | 2.977770000  |
| 1  | -3.489111000 | 0.894502000  | 2.385314000  |
| 1  | -2.456877000 | 2.900551000  | 3.163395000  |

IV'

E (BS1) = -2103.98125896

E (BS2) = -2104.50470226

G<sub>298.15,1M</sub> (BS2) = -2103.978708

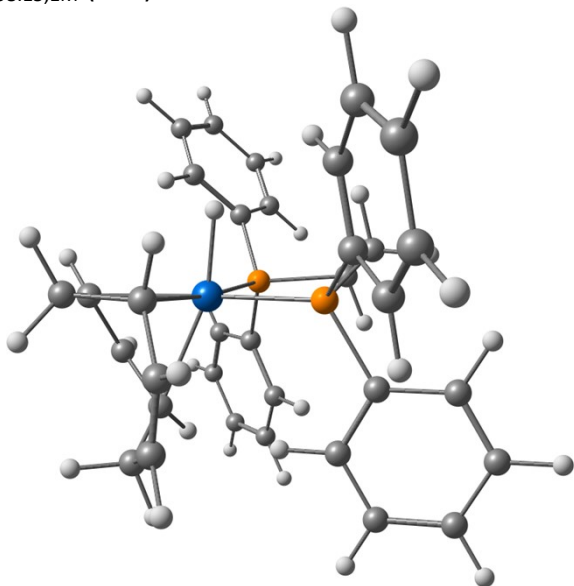

|    |              |              |              |
|----|--------------|--------------|--------------|
| 15 | -1.391420000 | -0.116844000 | -0.936018000 |
| 77 | -0.011417000 | -0.539650000 | 0.830228000  |
| 6  | -0.402799000 | -0.468021000 | -2.482806000 |
| 1  | -0.942722000 | -0.152492000 | -3.380493000 |
| 6  | -1.561638000 | -1.197036000 | 2.197897000  |
| 6  | -2.621303000 | -0.185445000 | 2.452832000  |
| 6  | -2.414940000 | 1.062031000  | 2.899835000  |
| 6  | -1.054488000 | 1.661109000  | 3.175513000  |
| 6  | 0.145396000  | 1.274657000  | 2.287142000  |
| 6  | 1.098832000  | 0.249218000  | 2.577320000  |
| 6  | 0.776940000  | -1.094662000 | 2.880797000  |
| 6  | -0.601491000 | -1.521837000 | 3.372978000  |
| 1  | -0.049586000 | -2.058495000 | 0.263733000  |
| 1  | 1.610578000  | -1.783410000 | 3.000095000  |
| 1  | -0.883710000 | -1.033076000 | 4.315504000  |
| 1  | -0.589863000 | -2.600042000 | 3.564284000  |
| 1  | -0.781225000 | 1.463050000  | 4.223305000  |
| 1  | -2.009900000 | -2.114591000 | 1.813794000  |
| 1  | 2.144461000  | 0.455225000  | 2.348144000  |
| 1  | 0.624996000  | 2.156705000  | 1.864549000  |
| 6  | -2.873716000 | -1.195989000 | -1.065633000 |
| 6  | -2.688174000 | -2.579220000 | -1.224873000 |
| 6  | -4.175042000 | -0.700129000 | -0.901664000 |
| 6  | -3.782990000 | -3.442102000 | -1.247815000 |
| 6  | -5.269447000 | -1.568133000 | -0.914817000 |
| 6  | -5.077590000 | -2.938779000 | -1.092566000 |
| 1  | -1.684405000 | -2.984953000 | -1.305485000 |
| 1  | -4.338451000 | 0.362262000  | -0.756135000 |
| 1  | -3.624104000 | -4.509156000 | -1.376042000 |
| 1  | -6.271489000 | -1.169497000 | -0.783345000 |
| 1  | -5.929365000 | -3.612936000 | -1.103127000 |
| 6  | -2.032641000 | 1.580240000  | -1.270921000 |
| 6  | -1.794608000 | 2.604482000  | -0.346874000 |
| 6  | -2.728690000 | 1.877115000  | -2.455433000 |

|    |              |              |              |
|----|--------------|--------------|--------------|
| 6  | -2.235127000 | 3.905822000  | -0.601956000 |
| 6  | -3.167471000 | 3.176078000  | -2.710108000 |
| 6  | -2.920108000 | 4.193572000  | -1.783123000 |
| 1  | -1.259769000 | 2.366274000  | 0.564397000  |
| 1  | -2.943428000 | 1.090446000  | -3.173509000 |
| 1  | -2.044155000 | 4.690981000  | 0.124394000  |
| 1  | -3.704873000 | 3.394381000  | -3.628804000 |
| 1  | -3.261964000 | 5.205231000  | -1.983307000 |
| 1  | -0.267663000 | -1.552622000 | -2.530551000 |
| 6  | 0.953352000  | 0.241669000  | -2.371767000 |
| 1  | 1.635977000  | -0.083633000 | -3.161982000 |
| 1  | 0.820093000  | 1.322741000  | -2.477254000 |
| 15 | 1.721093000  | -0.067624000 | -0.680832000 |
| 6  | 2.990283000  | -1.363942000 | -1.008221000 |
| 6  | 3.001120000  | -2.519543000 | -0.215181000 |
| 6  | 3.951956000  | -1.223732000 | -2.023811000 |
| 6  | 3.955459000  | -3.517370000 | -0.431678000 |
| 6  | 4.901768000  | -2.221307000 | -2.240909000 |
| 6  | 4.905050000  | -3.370235000 | -1.443429000 |
| 1  | 2.249769000  | -2.630945000 | 0.560536000  |
| 1  | 3.969798000  | -0.326062000 | -2.636091000 |
| 1  | 3.952994000  | -4.408916000 | 0.189174000  |
| 1  | 5.640577000  | -2.102754000 | -3.028639000 |
| 1  | 5.646262000  | -4.146365000 | -1.612585000 |
| 6  | 2.718583000  | 1.457677000  | -0.392972000 |
| 6  | 2.057477000  | 2.699187000  | -0.433068000 |
| 6  | 4.066597000  | 1.426458000  | -0.005037000 |
| 6  | 2.736272000  | 3.877164000  | -0.125409000 |
| 6  | 4.742134000  | 2.608030000  | 0.312433000  |
| 6  | 4.082635000  | 3.835829000  | 0.248671000  |
| 1  | 1.003114000  | 2.745778000  | -0.690307000 |
| 1  | 4.596718000  | 0.480969000  | 0.045115000  |
| 1  | 2.210792000  | 4.827213000  | -0.170101000 |
| 1  | 5.787000000  | 2.564741000  | 0.607437000  |
| 1  | 4.610627000  | 4.753424000  | 0.492071000  |
| 1  | -1.154081000 | 2.752407000  | 3.118743000  |
| 1  | -3.648413000 | -0.487047000 | 2.242403000  |
| 1  | -3.270171000 | 1.708128000  | 3.093191000  |

II''

E (BS1) = -2103.98194491

E (BS2) = -2104.50831575

G<sub>298.15,1M</sub> (BS2) = -2103.979656

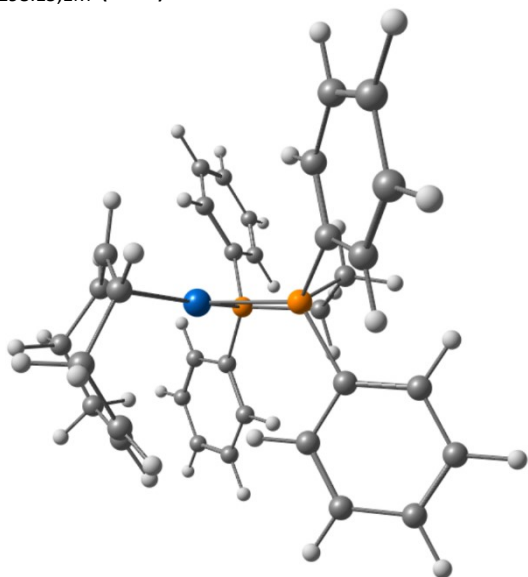

|    |              |              |              |
|----|--------------|--------------|--------------|
| 15 | -1.641167000 | -0.195790000 | -0.726575000 |
| 77 | -0.032161000 | -0.266712000 | 0.858279000  |
| 6  | -0.893021000 | -0.870128000 | -2.316430000 |
| 1  | -1.544757000 | -0.673331000 | -3.173388000 |
| 6  | 0.467335000  | 2.561649000  | 2.369953000  |
| 6  | 1.809881000  | 1.945229000  | 2.669205000  |
| 6  | 1.867483000  | 0.576207000  | 3.364056000  |
| 6  | 1.311767000  | -0.646311000 | 2.609737000  |
| 6  | -0.003153000 | -1.185372000 | 2.793986000  |
| 6  | -1.167696000 | -0.365803000 | 2.814629000  |
| 6  | -1.246615000 | 0.999327000  | 3.522225000  |
| 6  | -0.777318000 | 2.199041000  | 2.716301000  |
| 1  | 1.396683000  | 0.649780000  | 4.350148000  |
| 1  | 2.926664000  | 0.374776000  | 3.564456000  |
| 1  | -0.713102000 | 0.950680000  | 4.478137000  |
| 1  | -1.582647000 | 2.824483000  | 2.333244000  |
| 1  | 2.072897000  | -1.407551000 | 2.442139000  |
| 1  | 2.379620000  | 2.664223000  | 3.279925000  |
| 1  | 0.548168000  | 3.457331000  | 1.750825000  |
| 1  | -2.110796000 | -0.909555000 | 2.801324000  |
| 1  | -0.143513000 | -2.262279000 | 2.695689000  |
| 6  | -3.139922000 | -1.235825000 | -0.472157000 |
| 6  | -2.949723000 | -2.619840000 | -0.313957000 |
| 6  | -4.429978000 | -0.709201000 | -0.317649000 |
| 6  | -4.028823000 | -3.458277000 | -0.039300000 |
| 6  | -5.508920000 | -1.550228000 | -0.030817000 |
| 6  | -5.313858000 | -2.925281000 | 0.102682000  |
| 1  | -1.947227000 | -3.033774000 | -0.382662000 |
| 1  | -4.598573000 | 0.358025000  | -0.418214000 |
| 1  | -3.865977000 | -4.526637000 | 0.073717000  |
| 1  | -6.502327000 | -1.126060000 | 0.087204000  |
| 1  | -6.154234000 | -3.577388000 | 0.323383000  |
| 6  | -2.287144000 | 1.425086000  | -1.349343000 |
| 6  | -3.188372000 | 1.520871000  | -2.423344000 |

|    |              |              |              |
|----|--------------|--------------|--------------|
| 6  | -1.775832000 | 2.603803000  | -0.788356000 |
| 6  | -2.158515000 | 3.853037000  | -1.285162000 |
| 6  | -3.574654000 | 2.767586000  | -2.916029000 |
| 6  | -3.057955000 | 3.936842000  | -2.348901000 |
| 1  | -3.598618000 | 0.619211000  | -2.870236000 |
| 1  | -1.077005000 | 2.529077000  | 0.038469000  |
| 1  | -1.752320000 | 4.757594000  | -0.840408000 |
| 1  | -4.276382000 | 2.827945000  | -3.743509000 |
| 1  | -3.357534000 | 4.906911000  | -2.735871000 |
| 1  | -0.802501000 | -1.954947000 | -2.200249000 |
| 6  | 0.488386000  | -0.229496000 | -2.501048000 |
| 1  | 1.059395000  | -0.716536000 | -3.296887000 |
| 1  | 0.379054000  | 0.826663000  | -2.768173000 |
| 15 | 1.419314000  | -0.319028000 | -0.865213000 |
| 6  | 2.450941000  | -1.832760000 | -1.099474000 |
| 6  | 2.271070000  | -2.923033000 | -0.237892000 |
| 6  | 3.374097000  | -1.941038000 | -2.152999000 |
| 6  | 3.002279000  | -4.099662000 | -0.421659000 |
| 6  | 4.103437000  | -3.115614000 | -2.336438000 |
| 6  | 3.919244000  | -4.197191000 | -1.469370000 |
| 1  | 1.542655000  | -2.837192000 | 0.563401000  |
| 1  | 3.532734000  | -1.101015000 | -2.824280000 |
| 1  | 2.853236000  | -4.938241000 | 0.253081000  |
| 1  | 4.816938000  | -3.187212000 | -3.152835000 |
| 1  | 4.487668000  | -5.111904000 | -1.613542000 |
| 6  | 2.632148000  | 1.071001000  | -0.962685000 |
| 6  | 2.152211000  | 2.362829000  | -1.241037000 |
| 6  | 3.974416000  | 0.920280000  | -0.582971000 |
| 6  | 2.997600000  | 3.468602000  | -1.162868000 |
| 6  | 4.818968000  | 2.030176000  | -0.498811000 |
| 6  | 4.335154000  | 3.306303000  | -0.789882000 |
| 1  | 1.106563000  | 2.512359000  | -1.494981000 |
| 1  | 4.363772000  | -0.064822000 | -0.346232000 |
| 1  | 2.610122000  | 4.459122000  | -1.385509000 |
| 1  | 5.855505000  | 1.894739000  | -0.202177000 |
| 1  | 4.992156000  | 4.168764000  | -0.722667000 |
| 1  | 2.354640000  | 1.878846000  | 1.719020000  |
| 1  | -2.296220000 | 1.170172000  | 3.781799000  |

V

E (BS1) = -2103.97728329

E (BS2) = -2104.50155895

G<sub>298.15,1M</sub> (BS2) = -2103.976381

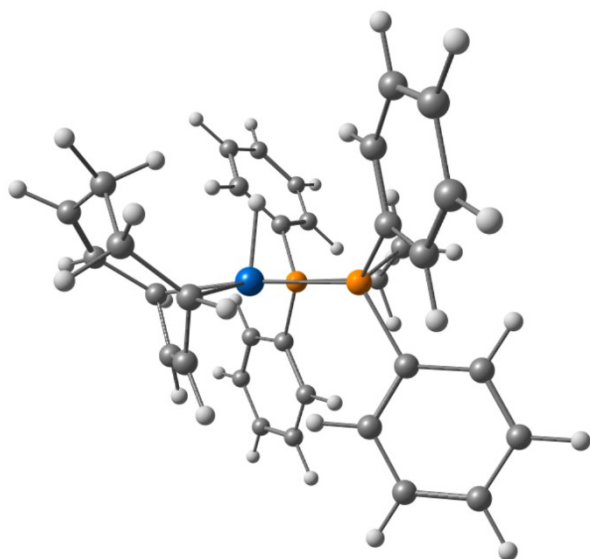

|    |              |              |              |
|----|--------------|--------------|--------------|
| 15 | -1.486271000 | 0.470314000  | 0.765159000  |
| 77 | 0.039566000  | -0.606334000 | -0.601798000 |
| 6  | -0.561570000 | 1.432003000  | 2.087934000  |
| 1  | -1.155295000 | 1.492249000  | 3.004197000  |
| 6  | -0.904861000 | -3.797302000 | -2.465871000 |
| 6  | 0.480982000  | -3.870312000 | -1.888788000 |
| 6  | 1.492153000  | -2.892325000 | -2.508243000 |
| 6  | 1.419094000  | -1.413771000 | -2.090024000 |
| 6  | 0.650395000  | -0.347684000 | -2.744381000 |
| 6  | -0.751336000 | -0.288087000 | -2.663584000 |
| 6  | -1.522240000 | -1.342158000 | -1.980057000 |
| 6  | -1.714546000 | -2.729320000 | -2.489237000 |
| 1  | 1.440140000  | -2.971998000 | -3.603928000 |
| 1  | 2.493444000  | -3.241836000 | -2.224776000 |
| 1  | -2.508424000 | -0.942756000 | -1.725019000 |
| 1  | -2.702626000 | -2.887846000 | -2.931583000 |
| 1  | 2.442976000  | -1.063027000 | -1.931868000 |
| 1  | 0.861561000  | -4.891087000 | -2.017605000 |
| 1  | -1.290282000 | -4.714265000 | -2.912094000 |
| 1  | -1.245511000 | 0.631484000  | -2.977607000 |
| 1  | 1.164064000  | 0.531597000  | -3.134737000 |
| 6  | -2.582527000 | 1.726554000  | -0.025510000 |
| 6  | -2.006039000 | 2.906151000  | -0.529302000 |
| 6  | -3.943515000 | 1.486146000  | -0.266834000 |
| 6  | -2.776673000 | 3.831035000  | -1.231216000 |
| 6  | -4.711583000 | 2.409565000  | -0.981881000 |
| 6  | -4.133962000 | 3.585122000  | -1.461352000 |
| 1  | -0.946729000 | 3.098828000  | -0.386713000 |
| 1  | -4.410580000 | 0.580326000  | 0.105530000  |
| 1  | -2.316214000 | 4.741747000  | -1.604594000 |
| 1  | -5.763792000 | 2.206084000  | -1.160530000 |
| 1  | -4.733188000 | 4.303576000  | -2.013415000 |
| 6  | -2.671273000 | -0.570522000 | 1.721945000  |
| 6  | -3.491129000 | -0.015935000 | 2.719775000  |

|    |              |              |              |
|----|--------------|--------------|--------------|
| 6  | -2.777033000 | -1.938700000 | 1.435586000  |
| 6  | -3.681290000 | -2.738727000 | 2.139539000  |
| 6  | -4.389083000 | -0.816886000 | 3.424402000  |
| 6  | -4.484616000 | -2.181717000 | 3.135217000  |
| 1  | -3.442644000 | 1.047928000  | 2.936804000  |
| 1  | -2.147692000 | -2.368108000 | 0.663440000  |
| 1  | -3.754111000 | -3.797488000 | 1.906935000  |
| 1  | -5.016401000 | -0.377139000 | 4.194871000  |
| 1  | -5.185590000 | -2.805212000 | 3.683307000  |
| 1  | -0.423829000 | 2.453028000  | 1.718861000  |
| 6  | 0.802304000  | 0.778882000  | 2.348204000  |
| 1  | 1.432979000  | 1.413378000  | 2.978368000  |
| 1  | 0.679461000  | -0.186151000 | 2.849137000  |
| 15 | 1.623537000  | 0.438544000  | 0.703708000  |
| 6  | 2.241047000  | 2.124326000  | 0.263054000  |
| 6  | 1.772906000  | 2.735053000  | -0.907778000 |
| 6  | 3.099574000  | 2.847373000  | 1.109291000  |
| 6  | 2.154170000  | 4.040199000  | -1.231680000 |
| 6  | 3.480556000  | 4.149675000  | 0.786694000  |
| 6  | 3.007360000  | 4.748775000  | -0.384957000 |
| 1  | 1.097383000  | 2.182693000  | -1.553250000 |
| 1  | 3.480884000  | 2.388208000  | 2.017219000  |
| 1  | 1.781437000  | 4.500412000  | -2.142526000 |
| 1  | 4.145217000  | 4.697716000  | 1.448782000  |
| 1  | 3.303301000  | 5.763951000  | -0.634039000 |
| 6  | 3.135179000  | -0.517391000 | 1.129692000  |
| 6  | 2.973696000  | -1.730207000 | 1.821974000  |
| 6  | 4.418849000  | -0.147156000 | 0.703234000  |
| 6  | 4.075517000  | -2.533017000 | 2.111124000  |
| 6  | 5.520381000  | -0.959834000 | 0.984771000  |
| 6  | 5.353430000  | -2.149801000 | 1.693204000  |
| 1  | 1.980319000  | -2.057152000 | 2.113980000  |
| 1  | 4.566649000  | 0.775992000  | 0.152718000  |
| 1  | 3.934582000  | -3.464349000 | 2.652507000  |
| 1  | 6.508442000  | -0.659332000 | 0.647262000  |
| 1  | 6.210968000  | -2.779421000 | 1.913161000  |
| 1  | 0.448931000  | -3.670390000 | -0.809218000 |
| 1  | 0.118650000  | -1.796849000 | 0.492186000  |



## VI

E (BS1) = -2103.98016242

E (BS2) = -2104.50369247

G<sub>298.15,1M</sub> (BS2) = -2103.977759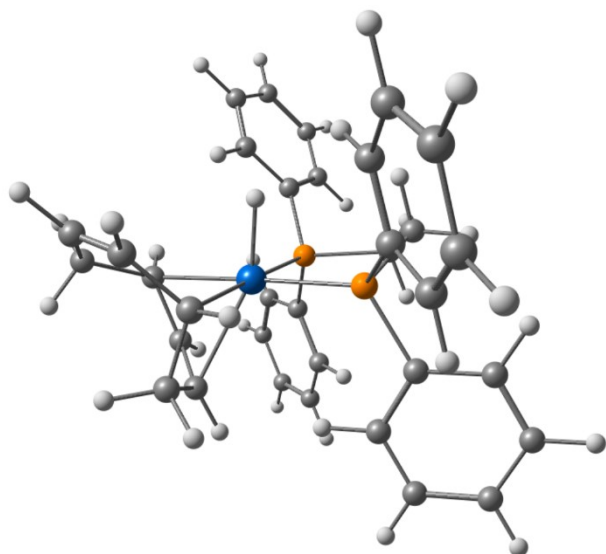

|    |              |              |              |
|----|--------------|--------------|--------------|
| 15 | 1.588009000  | 0.265353000  | -0.773055000 |
| 77 | -0.030521000 | -0.605509000 | 0.680610000  |
| 6  | 0.708296000  | 1.071395000  | -2.227491000 |
| 1  | 1.325580000  | 1.003877000  | -3.127731000 |
| 6  | -1.434338000 | -2.816538000 | 2.331555000  |
| 6  | -1.572532000 | -1.368452000 | 2.013949000  |
| 6  | -1.339036000 | -0.381031000 | 3.190641000  |
| 6  | -0.116701000 | 0.458394000  | 2.842840000  |
| 6  | 1.129491000  | -0.085641000 | 2.535402000  |
| 6  | 1.357429000  | -1.472857000 | 2.172003000  |
| 6  | 0.972868000  | -2.674358000 | 3.063489000  |
| 6  | -0.328929000 | -3.395733000 | 2.820069000  |
| 1  | -1.219690000 | -0.887476000 | 4.159217000  |
| 1  | -2.200500000 | 0.288639000  | 3.292484000  |
| 1  | 1.007790000  | -2.341899000 | 4.113453000  |
| 1  | -0.341659000 | -4.457163000 | 3.065768000  |
| 1  | -0.152101000 | 1.531592000  | 3.019597000  |
| 1  | -2.562903000 | -1.191754000 | 1.588563000  |
| 1  | -2.304942000 | -3.448822000 | 2.146186000  |
| 1  | 2.368318000  | -1.611811000 | 1.786839000  |
| 1  | 1.938248000  | 0.625683000  | 2.371275000  |
| 6  | 2.641458000  | 1.624406000  | -0.108180000 |
| 6  | 2.000384000  | 2.807733000  | 0.302112000  |
| 6  | 4.010852000  | 1.474270000  | 0.154911000  |
| 6  | 2.717395000  | 3.824166000  | 0.930378000  |
| 6  | 4.725852000  | 2.491355000  | 0.794039000  |
| 6  | 4.084765000  | 3.669285000  | 1.178468000  |
| 1  | 0.931237000  | 2.927066000  | 0.148943000  |
| 1  | 4.524576000  | 0.564059000  | -0.136571000 |
| 1  | 2.206799000  | 4.734086000  | 1.233626000  |
| 1  | 5.786262000  | 2.359021000  | 0.990257000  |
| 1  | 4.642595000  | 4.458651000  | 1.674106000  |
| 6  | 2.782738000  | -0.874975000 | -1.591650000 |
| 6  | 3.694865000  | -0.416817000 | -2.558631000 |

|    |              |              |              |
|----|--------------|--------------|--------------|
| 6  | 2.769616000  | -2.236469000 | -1.258702000 |
| 6  | 3.650587000  | -3.124359000 | -1.882733000 |
| 6  | 4.572920000  | -1.303870000 | -3.179826000 |
| 6  | 4.551106000  | -2.660981000 | -2.842504000 |
| 1  | 3.729399000  | 0.638367000  | -2.816681000 |
| 1  | 2.061268000  | -2.591554000 | -0.517217000 |
| 1  | 3.629521000  | -4.177675000 | -1.617467000 |
| 1  | 5.273931000  | -0.938120000 | -3.924986000 |
| 1  | 5.234804000  | -3.352147000 | -3.327636000 |
| 1  | 0.583975000  | 2.133240000  | -1.992094000 |
| 6  | -0.661655000 | 0.417139000  | -2.441351000 |
| 1  | -1.254832000 | 0.968087000  | -3.177044000 |
| 1  | -0.548391000 | -0.610369000 | -2.801046000 |
| 15 | -1.543231000 | 0.309586000  | -0.796351000 |
| 6  | -2.177193000 | 2.034129000  | -0.596068000 |
| 6  | -1.904490000 | 2.730032000  | 0.588217000  |
| 6  | -2.891103000 | 2.685804000  | -1.616953000 |
| 6  | -2.328338000 | 4.051583000  | 0.752433000  |
| 6  | -3.312038000 | 4.005472000  | -1.455002000 |
| 6  | -3.029372000 | 4.692021000  | -0.269944000 |
| 1  | -1.350230000 | 2.225947000  | 1.372351000  |
| 1  | -3.132805000 | 2.158529000  | -2.535532000 |
| 1  | -2.108868000 | 4.577769000  | 1.677367000  |
| 1  | -3.861818000 | 4.498201000  | -2.252077000 |
| 1  | -3.356585000 | 5.720623000  | -0.146607000 |
| 6  | -3.046532000 | -0.686215000 | -1.164757000 |
| 6  | -2.870701000 | -1.993168000 | -1.650976000 |
| 6  | -4.346254000 | -0.230507000 | -0.901717000 |
| 6  | -3.971777000 | -2.811836000 | -1.895218000 |
| 6  | -5.447822000 | -1.057330000 | -1.137858000 |
| 6  | -5.264720000 | -2.345919000 | -1.639571000 |
| 1  | -1.869063000 | -2.378134000 | -1.816136000 |
| 1  | -4.505587000 | 0.769358000  | -0.512113000 |
| 1  | -3.819632000 | -3.818259000 | -2.275076000 |
| 1  | -6.448544000 | -0.690863000 | -0.926454000 |
| 1  | -6.122112000 | -2.986860000 | -1.824527000 |
| 1  | -0.150514000 | -1.890127000 | -0.266012000 |
| 1  | 1.782355000  | -3.410448000 | 2.978865000  |

VII

E (BS1) = -2103.97050988

E (BS2) = -2104.49495125

G<sub>298.15,1M</sub> (BS2) = -2103.970085

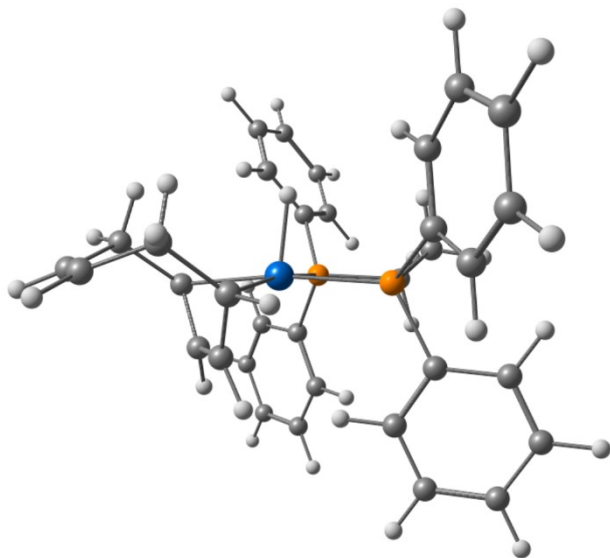

|    |              |              |              |
|----|--------------|--------------|--------------|
| 15 | -1.487347000 | 0.517674000  | 0.780564000  |
| 77 | 0.033689000  | -0.692928000 | -0.475835000 |
| 6  | -0.561921000 | 1.646959000  | 1.962765000  |
| 1  | -1.157922000 | 1.835290000  | 2.860006000  |
| 6  | 0.522832000  | -3.510987000 | -3.430425000 |
| 6  | 1.371466000  | -3.142088000 | -2.238650000 |
| 6  | 1.407147000  | -1.632913000 | -1.892271000 |
| 6  | 0.666162000  | -0.587291000 | -2.606414000 |
| 6  | -0.744877000 | -0.539507000 | -2.554911000 |
| 6  | -1.489842000 | -1.550409000 | -1.795842000 |
| 6  | -1.579100000 | -3.051981000 | -2.168085000 |
| 6  | -0.810679000 | -3.467227000 | -3.399140000 |
| 1  | 2.441979000  | -1.327285000 | -1.722341000 |
| 1  | 0.116278000  | -1.813428000 | 0.698924000  |
| 1  | -2.638786000 | -3.297425000 | -2.311065000 |
| 1  | -1.381372000 | -3.714913000 | -4.293290000 |
| 1  | 1.187354000  | 0.265984000  | -3.039605000 |
| 1  | 2.403396000  | -3.466734000 | -2.419169000 |
| 1  | 1.033236000  | -3.793724000 | -4.350274000 |
| 1  | -2.491041000 | -1.183323000 | -1.558499000 |
| 1  | -1.241263000 | 0.353226000  | -2.935160000 |
| 6  | -2.603141000 | 1.653262000  | -0.153224000 |
| 6  | -2.039436000 | 2.758326000  | -0.815780000 |
| 6  | -3.963990000 | 1.374245000  | -0.348655000 |
| 6  | -2.822196000 | 3.575702000  | -1.628760000 |
| 6  | -4.744449000 | 2.187887000  | -1.175161000 |
| 6  | -4.179251000 | 3.292161000  | -1.812651000 |
| 1  | -0.980154000 | 2.974084000  | -0.710186000 |
| 1  | -4.421368000 | 0.523611000  | 0.145858000  |
| 1  | -2.371370000 | 4.431373000  | -2.124196000 |
| 1  | -5.796323000 | 1.955177000  | -1.316543000 |
| 1  | -4.787587000 | 3.925618000  | -2.451955000 |
| 6  | -2.652285000 | -0.389746000 | 1.888686000  |
| 6  | -3.485243000 | 0.294924000  | 2.790686000  |

|    |              |              |              |
|----|--------------|--------------|--------------|
| 6  | -2.720581000 | -1.787939000 | 1.827887000  |
| 6  | -3.599749000 | -2.489757000 | 2.657418000  |
| 6  | -4.359415000 | -0.406356000 | 3.620081000  |
| 6  | -4.417007000 | -1.802044000 | 3.555181000  |
| 1  | -3.464341000 | 1.380616000  | 2.834981000  |
| 1  | -2.077148000 | -2.316130000 | 1.132303000  |
| 1  | -3.642270000 | -3.573915000 | 2.600791000  |
| 1  | -4.997142000 | 0.134297000  | 4.313992000  |
| 1  | -5.098415000 | -2.348129000 | 4.201692000  |
| 1  | -0.413892000 | 2.607097000  | 1.458469000  |
| 6  | 0.795206000  | 1.022478000  | 2.313497000  |
| 1  | 1.427777000  | 1.725763000  | 2.863590000  |
| 1  | 0.660339000  | 0.128344000  | 2.929696000  |
| 15 | 1.622324000  | 0.480874000  | 0.726279000  |
| 6  | 2.256922000  | 2.104709000  | 0.105541000  |
| 6  | 1.771634000  | 2.606165000  | -1.109509000 |
| 6  | 3.145657000  | 2.892968000  | 0.857017000  |
| 6  | 2.166460000  | 3.865524000  | -1.570013000 |
| 6  | 3.540521000  | 4.149433000  | 0.398258000  |
| 6  | 3.051152000  | 4.638315000  | -0.817118000 |
| 1  | 1.073559000  | 2.005358000  | -1.683204000 |
| 1  | 3.539762000  | 2.519306000  | 1.798104000  |
| 1  | 1.781427000  | 4.239685000  | -2.514621000 |
| 1  | 4.229382000  | 4.747667000  | 0.988195000  |
| 1  | 3.359562000  | 5.617572000  | -1.172425000 |
| 6  | 3.130133000  | -0.420476000 | 1.268464000  |
| 6  | 2.975481000  | -1.508589000 | 2.144590000  |
| 6  | 4.404851000  | -0.143334000 | 0.752636000  |
| 6  | 4.075705000  | -2.276889000 | 2.521218000  |
| 6  | 5.504040000  | -0.922706000 | 1.122674000  |
| 6  | 5.344743000  | -1.985233000 | 2.012470000  |
| 1  | 1.988000000  | -1.770990000 | 2.512300000  |
| 1  | 4.546649000  | 0.681877000  | 0.062496000  |
| 1  | 3.940637000  | -3.110537000 | 3.204716000  |
| 1  | 6.484602000  | -0.695260000 | 0.713572000  |
| 1  | 6.200423000  | -2.588713000 | 2.301870000  |
| 1  | 1.028477000  | -3.704249000 | -1.361657000 |
| 1  | -1.242866000 | -3.655494000 | -1.315528000 |

TS<sub>4-5'</sub>

E (BS1) = -2103.955271

E (BS2) = -2104.477955

G<sub>298.15,1M</sub> (BS2) = -2103.950232

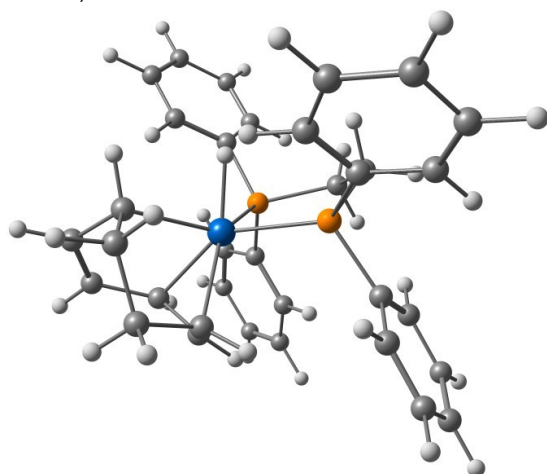

|    |              |              |              |
|----|--------------|--------------|--------------|
| 15 | -1.560492000 | 0.106065000  | -0.858275000 |
| 77 | 0.006467000  | -0.506341000 | 0.733968000  |
| 6  | -0.712014000 | 0.116143000  | -2.531399000 |
| 1  | -1.311386000 | 0.668697000  | -3.262071000 |
| 6  | 0.027091000  | -2.178703000 | 2.195567000  |
| 6  | -1.328051000 | -2.172703000 | 2.941460000  |
| 6  | -1.567831000 | -0.764957000 | 3.499862000  |
| 6  | -1.218817000 | 0.305857000  | 2.457660000  |
| 6  | 0.025608000  | 1.014112000  | 2.341877000  |
| 6  | 1.292122000  | 0.333082000  | 2.388508000  |
| 6  | 1.670384000  | -0.756696000 | 3.335621000  |
| 6  | 1.114115000  | -1.963045000 | 3.217075000  |
| 1  | -0.961128000 | -0.614473000 | 4.399086000  |
| 1  | -2.614771000 | -0.640657000 | 3.802845000  |
| 1  | 2.399173000  | -0.522055000 | 4.113247000  |
| 1  | 1.327042000  | -2.751468000 | 3.945777000  |
| 1  | -2.072116000 | 0.912098000  | 2.159235000  |
| 1  | -1.358261000 | -2.921551000 | 3.754294000  |
| 1  | 0.160341000  | -3.149512000 | 1.704156000  |
| 1  | 2.129812000  | 0.962476000  | 2.087883000  |
| 1  | 0.010625000  | 2.041325000  | 1.981090000  |
| 6  | -2.999823000 | -0.996740000 | -1.208187000 |
| 6  | -3.028462000 | -2.285799000 | -0.660515000 |
| 6  | -4.046589000 | -0.588887000 | -2.052073000 |
| 6  | -4.083848000 | -3.154300000 | -0.950272000 |
| 6  | -5.100191000 | -1.456395000 | -2.339176000 |
| 6  | -5.121178000 | -2.740961000 | -1.787475000 |
| 1  | -2.220155000 | -2.596355000 | -0.006469000 |
| 1  | -4.045458000 | 0.411188000  | -2.476402000 |
| 1  | -4.096086000 | -4.150032000 | -0.515789000 |
| 1  | -5.905755000 | -1.129861000 | -2.991237000 |
| 1  | -5.944921000 | -3.413911000 | -2.009024000 |
| 6  | -2.372073000 | 1.749317000  | -0.690481000 |
| 6  | -1.839859000 | 2.901257000  | -1.291891000 |
| 6  | -3.489597000 | 1.887936000  | 0.151715000  |
| 6  | -4.047876000 | 3.143393000  | 0.394087000  |
| 6  | -2.401250000 | 4.156694000  | -1.050734000 |

|    |              |              |              |
|----|--------------|--------------|--------------|
| 6  | -3.502569000 | 4.283076000  | -0.201840000 |
| 1  | -0.987991000 | 2.827837000  | -1.959106000 |
| 1  | -3.933963000 | 1.007909000  | 0.607135000  |
| 1  | -4.911508000 | 3.229667000  | 1.047469000  |
| 1  | -1.978086000 | 5.035006000  | -1.530462000 |
| 1  | -3.937111000 | 5.260190000  | -0.011636000 |
| 1  | -0.707924000 | -0.935163000 | -2.837394000 |
| 6  | 0.722845000  | 0.650629000  | -2.455908000 |
| 1  | 1.303653000  | 0.315083000  | -3.319625000 |
| 1  | 0.734570000  | 1.743692000  | -2.466469000 |
| 15 | 1.571508000  | 0.129051000  | -0.850386000 |
| 6  | 2.825562000  | -1.108925000 | -1.395092000 |
| 6  | 2.980365000  | -2.284526000 | -0.648148000 |
| 6  | 3.645037000  | -0.899163000 | -2.517317000 |
| 6  | 3.932490000  | -3.237182000 | -1.019895000 |
| 6  | 4.591968000  | -1.852952000 | -2.889662000 |
| 6  | 4.735968000  | -3.025109000 | -2.141206000 |
| 1  | 2.345971000  | -2.441726000 | 0.219075000  |
| 1  | 3.557451000  | 0.016541000  | -3.095820000 |
| 1  | 4.042921000  | -4.145065000 | -0.433443000 |
| 1  | 5.217898000  | -1.681111000 | -3.761047000 |
| 1  | 5.473369000  | -3.767973000 | -2.432628000 |
| 6  | 2.580387000  | 1.615452000  | -0.433620000 |
| 6  | 1.893318000  | 2.817204000  | -0.184363000 |
| 6  | 3.970052000  | 1.582052000  | -0.252130000 |
| 6  | 2.583488000  | 3.963315000  | 0.206047000  |
| 6  | 4.658825000  | 2.730506000  | 0.148147000  |
| 6  | 3.970917000  | 3.923301000  | 0.373807000  |
| 1  | 0.811628000  | 2.848898000  | -0.279771000 |
| 1  | 4.519706000  | 0.662025000  | -0.419987000 |
| 1  | 2.036960000  | 4.884228000  | 0.390296000  |
| 1  | 5.735916000  | 2.688494000  | 0.284650000  |
| 1  | 4.509259000  | 4.813994000  | 0.685092000  |
| 1  | -0.023834000 | -1.817196000 | -0.201405000 |
| 1  | -2.132144000 | -2.427396000 | 2.242473000  |

5'

E (BS1) = -2103.993976

E (BS2) = -2104.516146

G<sub>298.15,1M</sub> (BS2) = -2103.988125

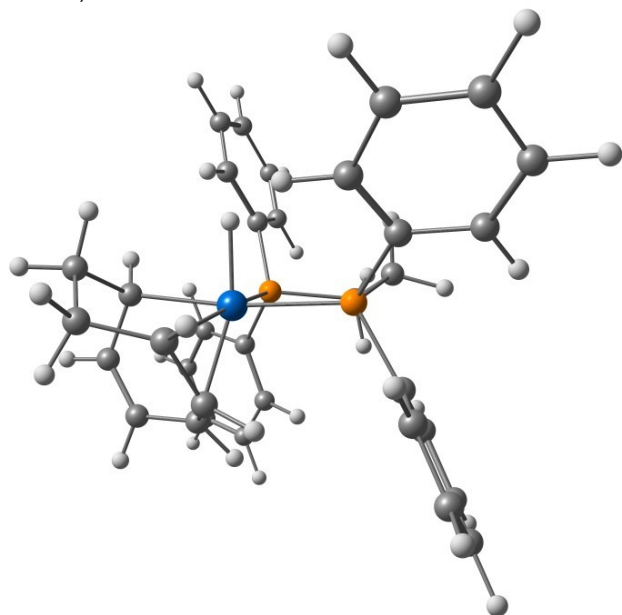

|    |              |              |              |
|----|--------------|--------------|--------------|
| 15 | 1.709981000  | 0.215586000  | -0.678787000 |
| 77 | -0.009402000 | -0.004024000 | 0.908107000  |
| 6  | 0.933513000  | 0.835177000  | -2.269979000 |
| 1  | 1.579387000  | 0.618973000  | -3.126994000 |
| 6  | 3.064623000  | 1.439739000  | -0.423399000 |
| 6  | 3.070718000  | 2.242068000  | 0.725277000  |
| 6  | 4.084057000  | 1.600984000  | -1.377203000 |
| 6  | 4.076989000  | 3.193576000  | 0.915422000  |
| 6  | 5.084329000  | 2.553259000  | -1.187654000 |
| 6  | 5.081550000  | 3.352466000  | -0.039819000 |
| 1  | 2.283484000  | 2.114598000  | 1.461538000  |
| 1  | 4.102342000  | 0.972736000  | -2.263634000 |
| 1  | 4.073466000  | 3.808296000  | 1.811261000  |
| 1  | 5.866868000  | 2.671010000  | -1.932174000 |
| 1  | 5.862955000  | 4.092672000  | 0.108305000  |
| 6  | 2.657058000  | -1.290177000 | -1.163278000 |
| 6  | 3.777702000  | -1.669529000 | -0.403259000 |
| 6  | 2.222228000  | -2.145607000 | -2.187667000 |
| 6  | 4.444861000  | -2.866676000 | -0.664425000 |
| 6  | 2.893034000  | -3.341890000 | -2.450836000 |
| 6  | 4.004547000  | -3.707467000 | -1.689357000 |
| 1  | 4.137972000  | -1.018726000 | 0.388612000  |
| 1  | 1.361362000  | -1.883918000 | -2.794007000 |
| 1  | 5.310867000  | -3.140107000 | -0.068142000 |
| 1  | 2.547260000  | -3.986326000 | -3.254506000 |
| 1  | 4.525200000  | -4.638587000 | -1.893738000 |
| 1  | 0.892306000  | 1.923765000  | -2.155938000 |
| 6  | -0.479078000 | 0.274183000  | -2.474018000 |
| 1  | -1.017392000 | 0.836575000  | -3.242682000 |
| 1  | -0.442790000 | -0.767747000 | -2.800960000 |
| 15 | -1.436299000 | 0.310693000  | -0.859755000 |
| 6  | -2.379264000 | 1.891834000  | -0.997181000 |
| 6  | -2.228161000 | 2.895175000  | -0.031381000 |

|   |              |              |              |
|---|--------------|--------------|--------------|
| 6 | -3.239772000 | 2.118860000  | -2.085951000 |
| 6 | -2.920391000 | 4.103393000  | -0.152348000 |
| 6 | -3.929399000 | 3.324179000  | -2.205707000 |
| 6 | -3.770126000 | 4.320277000  | -1.237154000 |
| 1 | -1.559809000 | 2.727183000  | 0.806075000  |
| 1 | -3.383116000 | 1.345013000  | -2.835306000 |
| 1 | -2.793644000 | 4.872689000  | 0.604244000  |
| 1 | -4.591404000 | 3.486608000  | -3.051703000 |
| 1 | -4.307437000 | 5.260003000  | -1.330121000 |
| 6 | -2.729779000 | -0.982353000 | -1.082715000 |
| 6 | -2.343469000 | -2.269447000 | -1.491374000 |
| 6 | -4.064319000 | -0.765122000 | -0.712174000 |
| 6 | -3.274829000 | -3.303338000 | -1.560793000 |
| 6 | -4.995174000 | -1.805058000 | -0.772164000 |
| 6 | -4.606048000 | -3.073779000 | -1.201227000 |
| 1 | -1.304304000 | -2.477048000 | -1.728835000 |
| 1 | -4.382760000 | 0.215770000  | -0.375210000 |
| 1 | -2.959609000 | -4.291389000 | -1.884741000 |
| 1 | -6.025101000 | -1.619791000 | -0.480019000 |
| 1 | -5.331390000 | -3.881120000 | -1.248517000 |
| 1 | 0.121175000  | 1.582964000  | 1.148715000  |
| 6 | 1.029847000  | -0.639302000 | 2.784100000  |
| 6 | 0.141444000  | -0.399763000 | 4.013179000  |
| 6 | -1.055116000 | 0.504381000  | 3.680704000  |
| 6 | -1.647800000 | 0.065891000  | 2.320760000  |
| 6 | -2.260808000 | -1.302675000 | 2.467978000  |
| 6 | -1.606516000 | -2.386874000 | 2.039448000  |
| 6 | -0.291180000 | -2.289670000 | 1.350517000  |
| 6 | 0.912363000  | -1.755746000 | 1.882366000  |
| 1 | -1.805425000 | 0.465257000  | 4.489544000  |
| 1 | -0.714278000 | 1.543139000  | 3.605603000  |
| 1 | -0.137249000 | -3.022305000 | 0.558128000  |
| 1 | 1.826493000  | -2.079038000 | 1.386872000  |
| 1 | -2.424589000 | 0.786065000  | 2.028861000  |
| 1 | -0.222975000 | -1.361029000 | 4.393083000  |
| 1 | 2.061095000  | -0.311902000 | 2.914259000  |
| 1 | -2.022855000 | -3.386040000 | 2.170838000  |
| 1 | -3.199173000 | -1.410495000 | 3.018931000  |
| 1 | 0.745988000  | 0.042110000  | 4.814113000  |

TS<sub>5',5</sub>

E (BS1) = -2103.972105

E (BS2) = -2104.496261

G<sub>298.15,1M</sub> (BS2) = -2103.971605

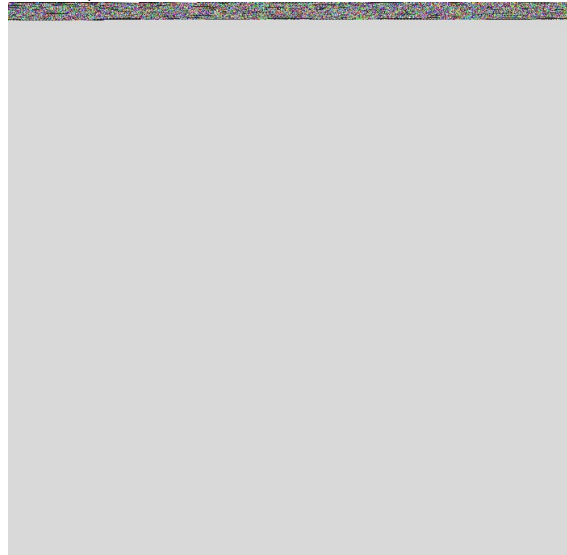

|    |              |              |              |
|----|--------------|--------------|--------------|
| 15 | 1.590668000  | 0.447049000  | -0.781051000 |
| 77 | -0.003966000 | -0.008853000 | 0.855838000  |
| 6  | 0.708889000  | 1.215091000  | -2.245471000 |
| 1  | 1.319108000  | 1.161411000  | -3.153333000 |
| 6  | -1.432568000 | -0.533369000 | 2.377817000  |
| 6  | -0.869104000 | -0.067284000 | 3.739828000  |
| 6  | 0.674509000  | -0.142113000 | 3.813567000  |
| 6  | 1.327957000  | -0.546605000 | 2.464775000  |
| 6  | 1.576067000  | -2.012485000 | 2.323938000  |
| 6  | 0.688488000  | -3.039059000 | 2.285936000  |
| 6  | -0.774463000 | -3.032325000 | 2.243150000  |
| 6  | -1.661173000 | -2.003283000 | 2.234617000  |
| 1  | 0.993134000  | -0.831648000 | 4.608032000  |
| 1  | 1.065958000  | 0.844024000  | 4.094550000  |
| 1  | -1.206487000 | -4.026057000 | 2.124703000  |
| 1  | -2.695150000 | -2.294801000 | 2.041650000  |
| 1  | 2.297903000  | -0.041930000 | 2.392879000  |
| 1  | -1.330636000 | -0.631010000 | 4.564410000  |
| 1  | -2.402791000 | -0.043891000 | 2.234655000  |
| 1  | 1.119232000  | -4.036709000 | 2.200837000  |
| 1  | 2.620305000  | -2.306460000 | 2.206275000  |
| 6  | 2.966296000  | 1.629969000  | -0.476586000 |
| 6  | 2.932249000  | 2.431800000  | 0.673651000  |
| 6  | 4.032808000  | 1.770876000  | -1.379254000 |
| 6  | 3.942919000  | 3.366898000  | 0.911028000  |
| 6  | 5.041113000  | 2.703648000  | -1.139345000 |
| 6  | 4.996651000  | 3.504458000  | 0.006001000  |
| 1  | 2.117834000  | 2.312643000  | 1.381538000  |
| 1  | 4.080439000  | 1.142911000  | -2.264729000 |
| 1  | 3.909235000  | 3.980963000  | 1.806564000  |
| 1  | 5.862272000  | 2.804311000  | -1.843642000 |
| 1  | 5.784640000  | 4.228619000  | 0.192933000  |
| 6  | 2.463679000  | -1.024780000 | -1.458047000 |
| 6  | 3.423841000  | -1.644536000 | -0.637733000 |
| 6  | 2.149454000  | -1.616481000 | -2.690991000 |

|    |              |              |              |
|----|--------------|--------------|--------------|
| 6  | 4.053236000  | -2.820103000 | -1.041655000 |
| 6  | 2.777138000  | -2.799206000 | -3.091733000 |
| 6  | 3.728046000  | -3.404455000 | -2.269286000 |
| 1  | 3.682444000  | -1.197260000 | 0.317120000  |
| 1  | 1.420493000  | -1.160911000 | -3.352869000 |
| 1  | 4.794815000  | -3.282369000 | -0.396251000 |
| 1  | 2.524571000  | -3.242929000 | -4.050836000 |
| 1  | 4.214577000  | -4.323848000 | -2.582016000 |
| 1  | 0.606363000  | 2.275255000  | -1.987099000 |
| 6  | -0.677654000 | 0.587978000  | -2.457076000 |
| 1  | -1.266616000 | 1.175748000  | -3.166947000 |
| 1  | -0.591651000 | -0.423584000 | -2.865587000 |
| 15 | -1.578253000 | 0.410256000  | -0.815102000 |
| 6  | -2.643124000 | 1.908369000  | -0.730164000 |
| 6  | -2.679700000 | 2.650959000  | 0.459229000  |
| 6  | -3.427279000 | 2.327557000  | -1.818821000 |
| 6  | -3.478546000 | 3.793125000  | 0.556207000  |
| 6  | -4.224234000 | 3.467691000  | -1.720621000 |
| 6  | -4.249285000 | 4.203702000  | -0.532264000 |
| 1  | -2.080529000 | 2.329535000  | 1.304829000  |
| 1  | -3.429563000 | 1.755099000  | -2.742334000 |
| 1  | -3.496871000 | 4.359940000  | 1.482695000  |
| 1  | -4.826206000 | 3.780620000  | -2.569151000 |
| 1  | -4.868979000 | 5.092809000  | -0.457098000 |
| 6  | -2.740828000 | -0.981582000 | -1.122111000 |
| 6  | -2.170631000 | -2.243193000 | -1.371726000 |
| 6  | -4.131827000 | -0.884342000 | -0.977571000 |
| 6  | -2.975296000 | -3.373100000 | -1.503729000 |
| 6  | -4.935645000 | -2.020767000 | -1.099821000 |
| 6  | -4.362241000 | -3.264809000 | -1.367178000 |
| 1  | -1.090345000 | -2.346468000 | -1.443650000 |
| 1  | -4.592377000 | 0.075171000  | -0.766208000 |
| 1  | -2.518280000 | -4.339478000 | -1.697183000 |
| 1  | -6.012291000 | -1.930441000 | -0.984797000 |
| 1  | -4.989720000 | -4.146570000 | -1.460821000 |
| 1  | -0.014985000 | 1.483193000  | 1.246125000  |
| 1  | -1.179150000 | 0.976795000  | 3.876169000  |

5

E (BS1) = -2103.995481

E (BS2) = -2104.516824

G<sub>298.15,1M</sub> (BS2) = -2103.989221

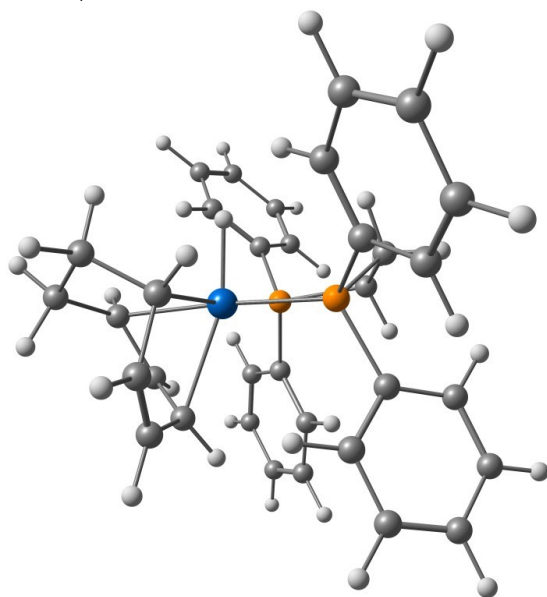

|    |              |              |              |
|----|--------------|--------------|--------------|
| 15 | -1.463031000 | 0.120967000  | -0.898603000 |
| 77 | -0.026671000 | -0.702223000 | 0.699363000  |
| 6  | -0.545066000 | 0.043549000  | -2.519732000 |
| 1  | -1.116763000 | 0.488839000  | -3.339502000 |
| 6  | 1.163909000  | -1.434105000 | 2.446786000  |
| 6  | 0.334895000  | -2.387963000 | 3.318481000  |
| 6  | -0.944878000 | -2.840589000 | 2.598992000  |
| 6  | -1.577242000 | -1.617154000 | 1.892906000  |
| 6  | -2.063938000 | -0.657221000 | 2.948165000  |
| 6  | -1.350247000 | 0.434227000  | 3.245319000  |
| 6  | -0.105882000 | 0.776737000  | 2.499447000  |
| 6  | 1.084945000  | 0.003442000  | 2.468178000  |
| 1  | -1.642379000 | -3.313236000 | 3.312436000  |
| 1  | -0.690397000 | -3.595351000 | 1.846739000  |
| 1  | 0.050521000  | 1.841416000  | 2.324950000  |
| 1  | 1.992924000  | 0.544950000  | 2.205923000  |
| 1  | -2.423230000 | -1.957518000 | 1.283908000  |
| 1  | 0.070807000  | -1.889785000 | 4.258117000  |
| 1  | 2.171283000  | -1.793730000 | 2.238909000  |
| 1  | -1.652670000 | 1.109594000  | 4.047132000  |
| 1  | -2.939757000 | -0.921943000 | 3.547881000  |
| 6  | -3.010437000 | -0.798374000 | -1.278541000 |
| 6  | -2.943106000 | -2.199934000 | -1.355361000 |
| 6  | -4.237674000 | -0.160630000 | -1.506221000 |
| 6  | -4.079593000 | -2.944633000 | -1.668445000 |
| 6  | -5.376304000 | -0.910769000 | -1.810783000 |
| 6  | -5.299736000 | -2.301559000 | -1.895581000 |
| 1  | -2.001562000 | -2.701501000 | -1.151012000 |
| 1  | -4.310045000 | 0.920388000  | -1.445095000 |
| 1  | -4.015033000 | -4.027798000 | -1.723076000 |
| 1  | -6.322470000 | -0.404617000 | -1.981448000 |
| 1  | -6.186696000 | -2.883148000 | -2.130951000 |
| 6  | -2.005380000 | 1.877400000  | -0.757668000 |
| 6  | -2.445727000 | 2.327720000  | 0.498097000  |

|    |              |              |              |
|----|--------------|--------------|--------------|
| 6  | -1.972455000 | 2.784139000  | -1.828397000 |
| 6  | -2.842390000 | 3.652274000  | 0.677314000  |
| 6  | -2.354885000 | 4.115498000  | -1.642501000 |
| 6  | -2.791192000 | 4.552197000  | -0.391047000 |
| 1  | -2.465279000 | 1.637113000  | 1.334794000  |
| 1  | -1.646501000 | 2.466374000  | -2.812967000 |
| 1  | -3.183424000 | 3.983215000  | 1.654334000  |
| 1  | -2.313147000 | 4.808487000  | -2.478237000 |
| 1  | -3.088859000 | 5.587268000  | -0.248564000 |
| 1  | -0.451656000 | -1.026558000 | -2.731216000 |
| 6  | 0.836796000  | 0.687355000  | -2.365287000 |
| 1  | 1.485517000  | 0.442824000  | -3.210888000 |
| 1  | 0.749484000  | 1.776785000  | -2.321747000 |
| 15 | 1.639952000  | 0.116712000  | -0.758945000 |
| 6  | 2.978758000  | -1.010740000 | -1.331174000 |
| 6  | 3.052964000  | -2.306834000 | -0.803414000 |
| 6  | 3.920408000  | -0.609830000 | -2.295124000 |
| 6  | 4.051070000  | -3.187157000 | -1.230531000 |
| 6  | 4.914483000  | -1.489708000 | -2.721084000 |
| 6  | 4.980891000  | -2.781174000 | -2.188285000 |
| 1  | 2.317394000  | -2.618720000 | -0.068824000 |
| 1  | 3.885267000  | 0.396520000  | -2.704098000 |
| 1  | 4.097492000  | -4.190128000 | -0.815556000 |
| 1  | 5.637009000  | -1.168960000 | -3.466391000 |
| 1  | 5.755589000  | -3.466286000 | -2.521334000 |
| 6  | 2.528226000  | 1.627922000  | -0.187232000 |
| 6  | 1.755937000  | 2.781671000  | 0.043443000  |
| 6  | 3.883425000  | 1.639472000  | 0.172243000  |
| 6  | 2.334755000  | 3.925754000  | 0.589572000  |
| 6  | 4.458948000  | 2.785883000  | 0.728364000  |
| 6  | 3.689977000  | 3.931447000  | 0.934297000  |
| 1  | 0.694122000  | 2.779676000  | -0.187603000 |
| 1  | 4.495605000  | 0.756546000  | 0.019843000  |
| 1  | 1.724787000  | 4.809472000  | 0.755469000  |
| 1  | 5.510909000  | 2.778987000  | 1.000189000  |
| 1  | 4.139548000  | 4.820863000  | 1.366582000  |
| 1  | -0.024837000 | -2.080171000 | -0.146665000 |
| 1  | 0.950741000  | -3.253728000 | 3.589108000  |

- 
- <sup>1</sup> O. V. Dolomanov, L. J. Bourhis, R. J. Gildea, J. A. K. Howard and H. Puschmann, *J. Appl. Cryst.* **2009**, *42*, 339-341.
  - <sup>2</sup> G. M. Sheldrick, *Acta Crystallogr. A* **2015**, *71*, 3-8.
  - <sup>3</sup> G. M. Sheldrick, *Acta Crystallogr. C* **2015**, *71*, 3-8.
  - <sup>4</sup> M. J. Fernandez, M. A. Esteruelas, M. Covarrubias and L. A. Oro, *J. Organomet. Chem.*, 1986, **316**, 343-349.
  - <sup>5</sup> M. Fabbian, N. Marsich and E. Farnetti, *Inorg. Chim. Acta*, 2004, **357**, 2881-2888.
  - <sup>6</sup> M. J. Fernandez, M. A. Esteruelas, M. Covarrubias and L. A. Oro, *J. Organomet. Chem.*, 1986, **316**, 343-349.
